# Supplementary material for: A Cell-based Computational Modeling Approach for Developing Site-Directed Molecular Probes
Source: PubMed Central journal article supplement (PMC3285574; doi:10.1371/journal.pcbi.1002378), 2012-02-23
Supplement: pcbi.1002378.s003.pdf [file pcbi.1002378.s003.pdf]

**Instruction**  
**m code for Figure 3 -A**

There are five m files in this PDF file. Their locations were listed in the table below. Put all five m files as noted below into same folder, and run Main.m file to run the simulation.

| <b>m file name</b> | <b>Pages (starting – end page)</b> |
|--------------------|------------------------------------|
| AT_aw_RL.m         | 2-13                               |
| AT_al_RL.m         | 14-23                              |
| AT_Lung_RL.m       | 24-31                              |
| AT_RL_IH_fun.m     | 32-33                              |
| Main.m             | 34-34                              |

```

% 4/30/2009
% 1CellPK based lung:airways model starts here (Rats)
% 12 compartments:
% aEp (surface lining liquied), imEp (Macrophage),
% cEp(epithelial cells),cEpMito(mito of cEp), cEpLyso (lyso of cEp)
% int(Interstitial),imInt(immune cells), sm(smooth muscle),
% cEd(endothelial cells), cEdMito(mito of cEd),cEdLyso (lyso of cEd), p(plasma)

```

```

function [M, G, M_v, Vp] = AT_aw_RL()

```

```

%molecular physiochemical property

```

```

pKa = 100;
logPN = 0.16 ;
logPD = -1.57;
z = 1;
% Constant
T = 273.15+37;
R = 8.314;
F = 96484.56;
%lipid fraction
LaEp = 0.2;
LimEp = 0.05;
LcEp = 0.05 ;
Lint = 0;
Lsm = 0.05;
LimInt = 0.05;
LcEd = 0.05;
Lp = 0;
%volumetric water fraction=1-lipid fraction
WaEp = 1 - LaEp;
WimEp = 1 - LimEp;
WcEp = 1 - LcEp;
Wint = 1 - Lint;
Wsm = 1 - Lsm;
WimInt = 1 - LimInt;
WcEd = 1 - LcEd;
Wp = 1 - Lp;
%activity coefficient of species(N:neutral,D:desociated)
GaEpN = 1;
GaEpD = 1;
GimEpN = 1.23;
GimEpD = 0.74;
GcEpN = 1.23;
GcEpD = 0.74;
GintN = 1;
GintD = 1;
GsmN = 1.23;
GsmD = 0.74;
GimIntN = 1.23;
GimIntD = 0.74;
GcEdN = 1.23;
GcEdD = 0.74;
GpN = 1;
GpD = 1;

```

```

% By Jingyu Yu (used in publication) parameters in airways
% Areas and volumes (m^2, m^3) for 7 membranes and corresponding compartments
AaEp = 108*10^(-4);% literature
AbEp = AaEp;% assuming same with apical
AimEp = 0;% No macrophage
AimInt = 0.01*AaEp;% estimate
Asm = AaEp*2;% two side, double the surface area of airway,T model
AbEd = AaEp/5;% estimated 1/5 surface of epithelium
AaEd = AbEd;% same as basal side
% volumes for 8 compartments(m3)
ASL = 15;% um literature
VaEp = AaEp*ASL*10^(-6);% 15 um thickness
VimEp = 10^(-30);% 10^(-12)*VaEp;% Any number, No macrophage at surface
VcEp = 0.072*10^(-6);% estimated from yori model,basement membrane->surface area->thickness of each
generation
Vint = AaEp*1*10^(-6);% estimated
Vsm = 0.047*10^(-6);% estimated from yori model,basement membrane->surface area->thickness of each
generation
VimInt = 0.01*Vint;% estimated
VcEd = AbEd*0.4*10^(-6);% estimated from literature,thickness of endothelium in AW

R_org = 0.1;
% calculate constant
VcEpMito = R_org*VcEp;
VcEpLyso = R_org*VcEp;
VcEdMito = R_org*VcEd;
VcEdLyso = R_org*VcEd;
VsmMito = R_org*Vsm;
VsmLyso = R_org*Vsm;

AcEpMito = 5.9924e+006*VcEpMito;
AcEpLyso = 5.9924e+006*VcEpLyso;
AcEdMito = 5.9924e+006*VcEdMito;
AcEdLyso = 5.9924e+006*VcEdLyso;
AsmMito = 5.9924e+006*VsmMito;
AsmLyso = 5.9924e+006*VsmLyso;
%#####

M_v = diag([VaEp,VimEp,VcEp,VcEpMito,VcEpLyso,Vint,Vsm, VsmMito, VsmLyso, VimInt, VcEd, VcEdMito,
VcEdLyso]);
V_LUN = trace(M_v)*10^6;
Vp = 340*10^(-9)*V_LUN;

% Membrane potential (V)
EaEp = -0.0093;
EbEp = 0.0119;%0.0119;
EimEp = -0.06;
Esm = -0.06;
EimInt = -0.06;
EbEd = -0.06;
EaEd = -0.06;
% pH values
pHaEp = 7.4;
pHimEp = 7.0;
pHcEp = 7.0;

```

```

pHint = 7.0;
pHsm = 7.0;
pHimInt = 7.0;
pHcEd = 7.0;
pHp = 7.4;

```

```

%adjustment for logP

```

```

if ( abs(z-1) <= 10^(-6) )
    logP_nlipT = 0.33*logPN+2.2 ;
    logP_dlipT = 0.37*logPD+2 ;
end
if ( abs(z+1) <= 10^(-6) )
    logP_nlipT = 0.37*logPN+2.2 ;
    logP_dlipT = 0.33*logPD+2.6 ;
end
if ( abs(z-0) <= 10^(-5) )
    logP_nlipT = 0.33*logPN+2.2 ;
    logP_dlipT = 0.33*logPD+2.2 ;
end

```

```

% Get the first two decimals

```

```

logP_n = round(logP_nlipT*100)/100 ;
logP_d = round(logP_dlipT*100)/100 ;
%calculate the membrane permeability
Pn = 10^(logP_n-6.7)*60; % in 1/min
Pd = 10^(logP_d-6.7)*60; % in 1/min

```

```

i = -sign(z) ;

```

```

%calculate N for flux of ion happening at 7 membranes

```

```

C = z*F/(R*T);
NaEp = C*(-EaEp) ;
NbEp = C*EbEp ;
NimEp = C*EimEp ;
Nsm = C*Esm ;
NimInt = C*EimInt ;
NbEd = C*(-EbEd) ;
NaEd = C*EaEd ;

```

```

%calculate Kn and Kd for 8 compartments

```

```

N = 1.22*10^(logP_n);
D = 1.22*10^(logP_d);
Kd = D;

```

```

KaEpN = N*LaEp ;
KaEpD = D*LaEp ;
KimEpN = N*LimEp ;
KimEpD = D*LimEp ;
KcEpN = N*LcEp ;
KcEpD = D*LcEp ;
KintN = N*Lint ;
KintD = D*Lint ;
KsmN = N*Lsm ;
KsmD = D*Lsm ;
KimIntN = N*LimInt ;
KimIntD = D*LimInt ;

```

```
KcEdN = N*LcEd ;
KcEdD = D*LcEd ;
KpN = N*Lp ;
KpD = D*Lp ;
```

```
%#####for mito and lyso compartments in cEp, sm and
cEd#####
```

```
LcEpMito = 0.05 ;
LcEpLyso = 0.05 ;
LsmMito = 0.05 ;
LsmLyso = 0.05 ;
LcEdMito = 0.05 ;
LcEdLyso = 0.05 ;
```

```
WcEpMito = 1-LcEpMito ;
WcEpLyso = 1-LcEpLyso ;
WsmMito = 1-LsmMito ;
WsmLyso = 1-LsmLyso ;
WcEdMito = 1-LcEdMito ;
WcEdLyso = 1-LcEdLyso ;
```

```
GcEpMitoN = 1.23 ;
GcEpMitoD = 0.74 ;
GcEpLysoN = 1.23 ;
GcEpLysoD = 0.74 ;
```

```
GsmMitoN = 1.23 ;
GsmMitoD = 0.74 ;
GsmLysoN = 1.23 ;
GsmLysoD = 0.74 ;
```

```
GcEdMitoN = 1.23 ;
GcEdMitoD = 0.74 ;
GcEdLysoN = 1.23 ;
GcEdLysoD = 0.74 ;
```

```
EcEpMito = -0.16 ;
EcEpLyso = +0.01 ;
EsmMito = -0.16 ;
EsmLyso = +0.01 ;
EcEdMito = -0.16 ;
EcEdLyso = +0.01 ;
```

```
pHcEpMito = 8 ;
pHcEpLyso = 5 ;
pHsmMito = 8 ;
pHsmLyso = 5 ;
pHcEdMito = 8 ;
pHcEdLyso = 5 ;
```

```
NcEpMito = C*EcEpMito ;
NcEpLyso = C*EcEpLyso ;
NsmMito = C*EsmMito ;
NsmLyso = C*EsmLyso ;
```

NcEdMito = C\*EcEdMito ;  
NcEdLyso = C\*EcEdLyso ;

KcEpMitoN = N\*LcEpMito ;  
KcEpMitoD = D\*LcEpMito ;  
KcEpLysoN = N\*LcEpLyso ;  
KcEpLysoD = D\*LcEpLyso ;

KsmMitoN = N\*LsmMito ;  
KsmMitoD = D\*LsmMito ;  
KsmLysoN = N\*LsmLyso ;  
KsmLysoD = D\*LsmLyso ;

KcEdMitoN = N\*LcEdMito ;  
KcEdMitoD = D\*LcEdMito ;  
KcEdLysoN = N\*LcEdLyso ;  
KcEdLysoD = D\*LcEdLyso ;

fcEpMitoN = 1/(WcEpMito/GcEpMitoN+KcEpMitoN/GcEpMitoN+WcEpMito\*10^(i\*(pHcEpMito-pKa))/GcEpMitoD...  
+KcEpMitoD\*10^(i\*(pHcEpMito-pKa))/GcEpMitoD);  
fcEpMitoD = fcEpMitoN\*10^(i\*(pHcEpMito-pKa));

fcEpLysoN = 1/(WcEpLyso/GcEpLysoN+KcEpLysoN/GcEpLysoN+WcEpLyso\*10^(i\*(pHcEpLyso-pKa))/GcEpLysoD...  
+KcEpLysoD\*10^(i\*(pHcEpLyso-pKa))/GcEpLysoD);  
fcEpLysoD = fcEpLysoN\*10^(i\*(pHcEpLyso-pKa));

fsmMitoN = 1/(WsmMito/GsmMitoN+KsmMitoN/GsmMitoN+WsmMito\*10^(i\*(pHsmMito-pKa))/GsmMitoD...  
+KsmMitoD\*10^(i\*(pHsmMito-pKa))/GsmMitoD);  
fsmMitoD = fsmMitoN\*10^(i\*(pHsmMito-pKa));

fsmLysoN = 1/(WsmLyso/GsmLysoN+KsmLysoN/GsmLysoN+WsmLyso\*10^(i\*(pHsmLyso-pKa))/GsmLysoD...  
+KsmLysoD\*10^(i\*(pHsmLyso-pKa))/GsmLysoD);  
fsmLysoD = fsmLysoN\*10^(i\*(pHsmLyso-pKa));

fcEdMitoN = 1/(WcEdMito/GcEdMitoN+KcEdMitoN/GcEdMitoN+WcEdMito\*10^(i\*(pHcEdMito-pKa))/GcEdMitoD...  
+KcEdMitoD\*10^(i\*(pHcEdMito-pKa))/GcEdMitoD);  
fcEdMitoD = fcEdMitoN\*10^(i\*(pHcEdMito-pKa));

fcEdLysoN = 1/(WcEdLyso/GcEdLysoN+KcEdLysoN/GcEdLysoN+WcEdLyso\*10^(i\*(pHcEdLyso-pKa))/GcEdLysoD...  
+KcEdLysoD\*10^(i\*(pHcEdLyso-pKa))/GcEdLysoD);  
fcEdLysoD = fcEdLysoN\*10^(i\*(pHcEdLyso-pKa));

%#####

%compute the fn and fd for 8 compartments

faEpN = 1/(WaEp/GaEpN+KaEpN/GaEpN+WaEp\*10^(i\*(pHaEp-pKa))/GaEpD...  
+KaEpD\*10^(i\*(pHaEp-pKa))/GaEpD);

```

faEpD = faEpN*10^(i*(pHaEp-pKa));
fimEpN = 1/(WimEp/GimEpN+KimEpN/GimEpN+WimEp*10^(i*(pHimEp-pKa))/GimEpD...
+KimEpD*10^(i*(pHimEp-pKa))/GimEpD);
fimEpD = fimEpN*10^(i*(pHimEp-pKa));
fcEpN = 1/(WcEp/GcEpN+KcEpN/GcEpN+WcEp*10^(i*(pHcEp-pKa))/GcEpD...
+KcEpD*10^(i*(pHcEp-pKa))/GcEpD);
fcEpD = fcEpN*10^(i*(pHcEp-pKa));
fintN = 1/(Wint/GintN+KintN/GintN+Wint*10^(i*(pHint-pKa))/GintD...
+KintD*10^(i*(pHint-pKa))/GintD);
fintD = fintN*10^(i*(pHint-pKa));
fimIntN = 1/(WimInt/GimIntN+KimIntN/GimIntN+WimInt*10^(i*(pHimInt-pKa))/GimIntD...
+KimIntD*10^(i*(pHimInt-pKa))/GimIntD);
fimIntD = fimIntN*10^(i*(pHimInt-pKa));
fsmN = 1/(Wsm/GsmN+KsmN/GsmN+Wsm*10^(i*(pHsm-pKa))/GsmD...
+KsmD*10^(i*(pHsm-pKa))/GsmD);
fsmD = fsmN*10^(i*(pHsm-pKa));
fcEdN = 1/(WcEd/GcEdN+KcEdN/GcEdN+WcEd*10^(i*(pHcEd-pKa))/GcEdD...
+KcEdD*10^(i*(pHcEd-pKa))/GcEdD);
fcEdD = fcEdN*10^(i*(pHcEd-pKa));
fpN = 1/(Wp/GpN+KpN/GpN+Wp*10^(i*(pHp-pKa))/GpD...
+KpD*10^(i*(pHp-pKa))/GpD);
fpD = fpN*10^(i*(pHp-pKa));

% mucus clearance
% Ke = 0.02;
Ke = 0;

% compute the coefficient matrix for ODEs
% #1: Surface Lining Liquid (aEp)
KaEp_aEp = AaEp/VaEp*(Pn*(-faEpN)+Pd*NaEp/(exp(NaEp)-1)*(-faEpD)*exp(NaEp))...
-AimEp/VaEp*(Pn*faEpN+Pd*NimEp/(exp(NimEp)-1)*faEpD)...
-Ke;
KaEp_imEp = -AimEp/VaEp*(Pn*(-fimEpN)+Pd*NimEp/(exp(NimEp)-1)*(-fimEpD)*exp(NimEp));
KaEp_cEp = AaEp/VaEp*(Pn*(fcEpN)+Pd*NaEp/(exp(NaEp)-1)*(fcEpD));
KaEp_cEpMito = 0;
KaEp_cEpLyso = 0;
KaEp_int = 0;
KaEp_sm = 0;
KaEp_smMito = 0;
KaEp_smLyso = 0;
KaEp_imInt = 0;
KaEp_cEd = 0;
KaEp_cEdMito = 0;
KaEp_cEdLyso = 0;
KaEp_p = 0;
SaEp = 0;

% #2: Macrophage (imEp)
KimEp_aEp = AimEp/VimEp*(Pn*faEpN+Pd*NimEp/(exp(NimEp)-1)*faEpD);
KimEp_imEp = AimEp/VimEp*(Pn*(-fimEpN)+Pd*NimEp/(exp(NimEp)-1)*(-fimEpD)*exp(NimEp));
KimEp_cEp = 0;
KimEp_cEpMito = 0 ;
KimEp_cEpLyso = 0 ;
KimEp_int = 0;
KimEp_sm = 0;
KimEp_smMito = 0;

```

```

KimEp_smLyso = 0;
KimEp_imInt = 0;
KimEp_cEd = 0;
KimEp_cEdMito = 0 ;
KimEp_cEdLyso = 0 ;
KimEp_p = 0;
SimEp = 0;

```

### % #3: Epithelial Cells (cEp)

```

KcEp_aEp = -AaEp/VcEp*(Pn*(-faEpN)+Pd*NaEp/(exp(NaEp)-1)*(-faEpD)*exp(NaEp));
KcEp_imEp = 0;
KcEp_cEp = -AaEp/VcEp*(Pn*(fcEpN)+Pd*NaEp/(exp(NaEp)-1)*(fcEpD))...
    -AcEpMito/VcEp*(Pn*fcEpN+Pd*NcEpMito/(exp(NcEpMito)-1)*fcEpD)...
    -AcEpLyso/VcEp*(Pn*fcEpN+Pd*NcEpLyso/(exp(NcEpLyso)-1)*fcEpD)...
    +AbEp/VcEp*(Pn*(-fcEpN)+Pd*NbEp/(exp(NbEp)-1)*(-fcEpD)*exp(NbEp));
KcEp_cEpMito = -AcEpMito/VcEp*(Pn*(-fcEpMitoN)+Pd*NcEpMito/(exp(NcEpMito)-1)*(-
fcEpMitoD)*exp(NcEpMito)) ;
KcEp_cEpLyso = -AcEpLyso/VcEp*(Pn*(-fcEpLysoN)+Pd*NcEpLyso/(exp(NcEpLyso)-1)*(-
fcEpLysoD)*exp(NcEpLyso)) ;
KcEp_int = AbEp/VcEp*(Pn*(fintN)+Pd*NbEp/(exp(NbEp)-1)*(fintD));
KcEp_sm = 0;
KcEp_smMito = 0;
KcEp_smLyso = 0;
KcEp_imInt = 0;
KcEp_cEd = 0;
KcEp_cEdMito = 0 ;
KcEp_cEdLyso = 0 ;
KcEp_p = 0;
ScEp = 0;

```

### % #4: : Epithelial Cells (cEpMito)

```

KcEpMito_aEp = 0;
KcEpMito_imEp = 0;
KcEpMito_cEp = AcEpMito/VcEpMito*(Pn*(fcEpN)+Pd*NcEpMito/(exp(NcEpMito)-1)*(fcEpD));
KcEpMito_cEpMito = AcEpMito/VcEpMito*(Pn*(-fcEpMitoN)+Pd*NcEpMito/(exp(NcEpMito)-1)*(-
fcEpMitoD)*exp(NcEpMito));
KcEpMito_cEpLyso = 0 ;
KcEpMito_int = 0 ;
KcEpMito_sm = 0;
KcEpMito_smMito = 0;
KcEpMito_smLyso = 0;
KcEpMito_imInt = 0;
KcEpMito_cEd = 0;
KcEpMito_cEdMito = 0 ;
KcEpMito_cEdLyso = 0 ;
KcEpMito_p = 0;
ScEpMito = 0;

```

### % #5: : Epithelial Cells (cEpLyso)

```

KcEpLyso_aEp = 0;
KcEpLyso_imEp = 0;
KcEpLyso_cEp = AcEpLyso/VcEpLyso*(Pn*(fcEpN)+Pd*NcEpLyso/(exp(NcEpLyso)-1)*(fcEpD));
KcEpLyso_cEpMito = 0 ;
KcEpLyso_cEpLyso = AcEpLyso/VcEpLyso*(Pn*(-fcEpLysoN)+Pd*NcEpLyso/(exp(NcEpLyso)-1)*(-
fcEpLysoD)*exp(NcEpLyso));
KcEpLyso_int = 0 ;

```



```

KcEpLyso_sm = 0;
KcEpLyso_smMito = 0;
KcEpLyso_smLyso = 0;
KcEpLyso_imInt = 0;
KcEpLyso_cEd = 0;
KcEpLyso_cEdMito = 0 ;
KcEpLyso_cEdLyso = 0 ;
KcEpLyso_p = 0;
ScEpLyso = 0;

```

**% #6: Interstitium (int)**

```

Kint_aEp = 0;
Kint_imEp = 0;
Kint_cEp = -AbEp/Vint*(Pn*(-fcEpN)+Pd*NbEp/(exp(NbEp)-1)*(-fcEpD)*exp(NbEp));
Kint_cEpMito = 0 ;
Kint_cEpLyso = 0 ;
Kint_int = -AbEp/Vint*(Pn*(fintN)+Pd*NbEp/(exp(NbEp)-1)*(fintD))...
    -Asm/Vint*(Pn*fintN+Pd*Nsm/(exp(Nsm)-1)*fintD)...
    -AimInt/Vint*(Pn*fintN+Pd*NimInt/(exp(NimInt)-1)*fintD)...
    +AbEd/Vint*(Pn*(-fintN)+Pd*NbEd/(exp(NbEd)-1)*(-fintD)*exp(NbEd));
Kint_sm = -Asm/Vint*(Pn*(-fsmN)+Pd*Nsm/(exp(Nsm)-1)*(-fsmD)*exp(Nsm));
Kint_smMito = 0;
Kint_smLyso = 0;
Kint_imInt = -AimInt/Vint*(Pn*(-fimIntN)+Pd*NimInt/(exp(NimInt)-1)*(-fimIntD)*exp(NimInt));
Kint_cEd = AbEd/Vint*(Pn*(fcEdN)+Pd*NbEd/(exp(NbEd)-1)*(fcEdD));
Kint_cEdMito = 0 ;
Kint_cEdLyso = 0 ;
Kint_p = 0;
Sint = 0;

```

**% #7: Smooth Muscle (sm)**

```

Ksm_aEp = 0;
Ksm_imEp = 0;
Ksm_cEp = 0;
Ksm_cEpMito = 0 ;
Ksm_cEpLyso = 0 ;
Ksm_int = Asm/Vsm*(Pn*fintN+Pd*Nsm/(exp(Nsm)-1)*fintD);
Ksm_sm = Asm/Vsm*(Pn*(-fsmN)+Pd*Nsm/(exp(Nsm)-1)*(-fsmD)*exp(Nsm))...
    -AsmMito/Vsm*(Pn*fsmN+Pd*NsmMito/(exp(NsmMito)-1)*fsmD)...
    -AsmLyso/Vsm*(Pn*fsmN+Pd*NsmLyso/(exp(NsmLyso)-1)*fsmD);
Ksm_smMito = -AsmMito/Vsm*(Pn*(-fsmMitoN)+Pd*NsmMito/(exp(NsmMito)-1)*(-fsmMitoD)*exp(NsmMito)) ;
Ksm_smLyso = -AsmLyso/Vsm*(Pn*(-fsmLysoN)+Pd*NsmLyso/(exp(NsmLyso)-1)*(-fsmLysoD)*exp(NsmLyso)) ;
Ksm_imInt = 0;
Ksm_cEd = 0;
Ksm_cEdMito = 0 ;
Ksm_cEdLyso = 0 ;
Ksm_p = 0;
Ssm = 0;

```

**% #8: Smooth Muscle (smMito)**

```

KsmMito_aEp = 0;
KsmMito_imEp = 0;
KsmMito_cEp = 0;

```

```

KsmMito_cEpMito = 0;
KsmMito_cEpLyso = 0 ;
KsmMito_int = 0 ;
KsmMito_sm = AsmMito/VsmMito*(Pn*(fsmN)+Pd*NsmMito/(exp(NsmMito)-1)*(fsmD));
KsmMito_smMito = AsmMito/VsmMito*(Pn*(-fsmMitoN)+Pd*NsmMito/(exp(NsmMito)-1)*(-fsmMitoD)*exp(NsmMito));
KsmMito_smLyso = 0;
KsmMito_imInt = 0;
KsmMito_cEd = 0;
KsmMito_cEdMito = 0 ;
KsmMito_cEdLyso = 0 ;
KsmMito_p = 0;
SsmMito = 0;

```

#### % #9: Smooth Muscle (smLyso)

```

KsmLyso_aEp = 0;
KsmLyso_imEp = 0;
KsmLyso_cEp = 0;
KsmLyso_cEpMito = 0 ;
KsmLyso_cEpLyso = 0;
KsmLyso_int = 0 ;
KsmLyso_sm = AsmLyso/VsmLyso*(Pn*(fsmN)+Pd*NsmLyso/(exp(NsmLyso)-1)*(fsmD));
KsmLyso_smMito = 0;
KsmLyso_smLyso = AsmLyso/VsmLyso*(Pn*(-fsmLysoN)+Pd*NsmLyso/(exp(NsmLyso)-1)*(-fsmLysoD)*exp(NsmLyso));
KsmLyso_imInt = 0;
KsmLyso_cEd = 0;
KsmLyso_cEdMito = 0 ;
KsmLyso_cEdLyso = 0 ;
KsmLyso_p = 0;
SsmLyso = 0;

```

#### % #10: Immune Cells (imInt)

```

KimInt_aEp = 0;
KimInt_imEp = 0;
KimInt_cEp = 0;
KimInt_cEpMito = 0;
KimInt_cEpLyso = 0;
KimInt_int = AimInt/VimInt*(Pn*fintN+Pd*NimInt/(exp(NimInt)-1)*fintD);
KimInt_sm = 0;
KimInt_smMito = 0;
KimInt_smLyso = 0;
KimInt_imInt = AimInt/VimInt*(Pn*(-fimIntN)+Pd*NimInt/(exp(NimInt)-1)*(-fimIntD)*exp(NimInt));
KimInt_cEd = 0;
KimInt_cEdMito = 0;
KimInt_cEdLyso = 0;
KimInt_p = 0;
SimInt = 0;

```

#### % #11: Endothelial celss (cEd)

```

KcEd_aEp = 0;
KcEd_imEp = 0;
KcEd_cEp = 0;
KcEd_cEpMito = 0;
KcEd_cEpLyso = 0;
KcEd_int = -AbEd/VcEd*(Pn*(-fintN)+Pd*NbEd/(exp(NbEd)-1)*(-fintD)*exp(NbEd));

```

```

KcEd_sm = 0;
KcEd_smMito = 0;
KcEd_smLyso = 0;
KcEd_imInt = 0;
KcEd_cEd = -AbEd/VcEd*(Pn*(fcEdN)+Pd*NbEd/(exp(NbEd)-1)*(fcEdD))...
    -AcEdMito/VcEd*(Pn*fcEdN+Pd*NcEdMito/(exp(NcEdMito)-1)*fcEdD)...
    -AcEdLyso/VcEd*(Pn*fcEdN+Pd*NcEdLyso/(exp(NcEdLyso)-1)*fcEdD)...
    +AaEd/VcEd*(Pn*(-fcEdN)+Pd*NaEd/(exp(NaEd)-1)*(-fcEdD)*exp(NaEd));
KcEd_cEdMito = -AcEdMito/VcEd*(Pn*(-fcEdMitoN)+Pd*NcEdMito/(exp(NcEdMito)-1)*(-
fcEdMitoD)*exp(NcEdMito));
KcEd_cEdLyso = -AcEdLyso/VcEd*(Pn*(-fcEdLysoN)+Pd*NcEdLyso/(exp(NcEdLyso)-1)*(-
fcEdLysoD)*exp(NcEdLyso));
KcEd_p = AaEd/VcEd*(Pn*(fpN)+Pd*NaEd/(exp(NaEd)-1)*(fpD));
ScEd = 0;

```

**% #12: Endothelial celss (cEd) Mito**

```

KcEdMito_aEp = 0;
KcEdMito_imEp = 0;
KcEdMito_cEp = 0;
KcEdMito_cEpMito = 0;
KcEdMito_cEpLyso = 0;
KcEdMito_int = 0;
KcEdMito_sm = 0;
KcEdMito_smMito = 0;
KcEdMito_smLyso = 0;
KcEdMito_imInt = 0;
KcEdMito_cEd = AcEdMito/VcEdMito*(Pn*(fcEdN)+Pd*NcEdMito/(exp(NcEdMito)-1)*(fcEdD)) ;
KcEdMito_cEdMito = AcEdMito/VcEdMito*(Pn*(-fcEdMitoN)+Pd*NcEdMito/(exp(NcEdMito)-1)*(-
fcEdMitoD)*exp(NcEdMito));
KcEdMito_cEdLyso = 0;
KcEdMito_p = 0 ;
ScEdMito = 0;

```

**% #13: Endothelial celss (cEd) Lyso**

```

KcEdLyso_aEp = 0;
KcEdLyso_imEp = 0;
KcEdLyso_cEp = 0;
KcEdLyso_cEpMito = 0;
KcEdLyso_cEpLyso = 0;
KcEdLyso_int = 0 ;
KcEdLyso_sm = 0;
KcEdLyso_smMito = 0;
KcEdLyso_smLyso = 0;
KcEdLyso_imInt = 0;
KcEdLyso_cEd = AcEdLyso/VcEdLyso*(Pn*(fcEdN)+Pd*NcEdLyso/(exp(NcEdLyso)-1)*(fcEdD)) ;
KcEdLyso_cEdMito = 0;
KcEdLyso_cEdLyso = AcEdLyso/VcEdLyso*(Pn*(-fcEdLysoN)+Pd*NcEdLyso/(exp(NcEdLyso)-1)*(-
fcEdLysoD)*exp(NcEdLyso));
KcEdLyso_p = 0;
ScEdLyso = 0;

```

**% #14: plasma(p)**

```

Kp_aEp = 0;
Kp_imEp = 0;
Kp_cEp = 0;
Kp_cEpMito = 0;

```

$Kp\_cEpLyso = 0;$   
 $Kp\_int = 0;$   
 $Kp\_sm = 0;$   
 $Kp\_smMito = 0;$   
 $Kp\_smLyso = 0;$   
 $Kp\_imInt = 0;$   
 $Kp\_cEd = -AaEd/Vp*(Pn*(-fcEdN)+Pd*NaEd/(exp(NaEd)-1)*(-fcEdD)*exp(NaEd));$   
 $Kp\_cEdMito = 0;$   
 $Kp\_cEdLyso = 0;$   
 $Kp\_p = -AaEd/Vp*(Pn*(fpN)+Pd*NaEd/(exp(NaEd)-1)*(fpD));$   
 $Sp = 0;$

M =

$[KaEp\_aEp, KaEp\_imEp, KaEp\_cEp, KaEp\_cEpMito, KaEp\_cEpLyso, KaEp\_int, KaEp\_sm, KaEp\_smMito, KaEp\_smLyso, KaEp\_imInt, KaEp\_cEd, KaEp\_cEdMito, KaEp\_cEdLyso, KaEp\_p; ...$

$KimEp\_aEp, KimEp\_imEp, KimEp\_cEp, KimEp\_cEpMito, KimEp\_cEpLyso, KimEp\_int, KimEp\_sm, KimEp\_smMito, KimEp\_smLyso, KimEp\_imInt, KimEp\_cEd, KimEp\_cEdMito, KimEp\_cEdLyso, KimEp\_p; ...$

$KcEp\_aEp, KcEp\_imEp, KcEp\_cEp, KcEp\_cEpMito, KcEp\_cEpLyso, KcEp\_int, KcEp\_sm, KcEp\_smMito, KcEp\_smLyso, KcEp\_imInt, KcEp\_cEd, KcEp\_cEdMito, KcEp\_cEdLyso, KcEp\_p; ...$

$KcEpMito\_aEp, KcEpMito\_imEp, KcEpMito\_cEp, KcEpMito\_cEpMito, KcEpMito\_cEpLyso, KcEpMito\_int, KcEpMito\_sm, KcEpMito\_smMito, KcEpMito\_smLyso, KcEpMito\_imInt, KcEpMito\_cEd, KcEpMito\_cEdMito, KcEpMito\_cEdLyso, KcEpMito\_p; ...$

$KcEpLyso\_aEp, KcEpLyso\_imEp, KcEpLyso\_cEp, KcEpLyso\_cEpMito, KcEpLyso\_cEpLyso, KcEpLyso\_int, KcEpLyso\_sm, KcEpLyso\_smMito, KcEpLyso\_smLyso, KcEpLyso\_imInt, KcEpLyso\_cEd, KcEpLyso\_cEdMito, KcEpLyso\_cEdLyso, KcEpLyso\_p; ...$

$Kint\_aEp, Kint\_imEp, Kint\_cEp, Kint\_cEpMito, Kint\_cEpLyso, Kint\_int, Kint\_sm, Kint\_smMito, Kint\_smLyso, Kint\_imInt, Kint\_cEd, Kint\_cEdMito, Kint\_cEdLyso, Kint\_p; ...$

$Ksm\_aEp, Ksm\_imEp, Ksm\_cEp, Ksm\_cEpMito, Ksm\_cEpLyso, Ksm\_int, Ksm\_sm, Ksm\_smMito, Ksm\_smLyso, Ksm\_imInt, Ksm\_cEd, Ksm\_cEdMito, Ksm\_cEdLyso, Ksm\_p; ...$

$KsmMito\_aEp, KsmMito\_imEp, KsmMito\_cEp, KsmMito\_cEpMito, KsmMito\_cEpLyso, KsmMito\_int, KsmMito\_sm, KsmMito\_smMito, KsmMito\_smLyso, KsmMito\_imInt, KsmMito\_cEd, KsmMito\_cEdMito, KsmMito\_cEdLyso, KsmMito\_p; ...$

$KsmLyso\_aEp, KsmLyso\_imEp, KsmLyso\_cEp, KsmLyso\_cEpMito, KsmLyso\_cEpLyso, KsmLyso\_int, KsmLyso\_sm, KsmLyso\_smMito, KsmLyso\_smLyso, KsmLyso\_imInt, KsmLyso\_cEd, KsmLyso\_cEdMito, KsmLyso\_cEdLyso, KsmLyso\_p; ...$

$KimInt\_aEp, KimInt\_imEp, KimInt\_cEp, KimInt\_cEpMito, KimInt\_cEpLyso, KimInt\_int, KimInt\_sm, KimInt\_smMito, KimInt\_smLyso, KimInt\_imInt, KimInt\_cEd, KimInt\_cEdMito, KimInt\_cEdLyso, KimInt\_p; ...$

$KcEd\_aEp, KcEd\_imEp, KcEd\_cEp, KcEd\_cEpMito, KcEd\_cEpLyso, KcEd\_int, KcEd\_sm, KcEd\_smMito, KcEd\_smLyso, KcEd\_imInt, KcEd\_cEd, KcEd\_cEdMito, KcEd\_cEdLyso, KcEd\_p; ...$

$KcEdMito\_aEp, KcEdMito\_imEp, KcEdMito\_cEp, KcEdMito\_cEpMito, KcEdMito\_cEpLyso, KcEdMito\_int, KcEdMito\_sm, KcEdMito\_smMito, KcEdMito\_smLyso, KcEdMito\_imInt, KcEdMito\_cEd, KcEdMito\_cEdMito, KcEdMito\_cEdLyso, KcEdMito\_p; ...$

$KcEdLyso\_aEp, KcEdLyso\_imEp, KcEdLyso\_cEp, KcEdLyso\_cEpMito, KcEdLyso\_cEpLyso, KcEdLyso\_int, KcEdL$

yso\_sm,KcEdLyso\_smMito,KcEdLyso\_smLyso,KcEdLyso\_imInt,KcEdLyso\_cEd,KcEdLyso\_cEdMito,KcEdLyso\_cEdLyso,KcEdLyso\_p;...

Kp\_aEp,Kp\_imEp,Kp\_cEp,Kp\_cEpMito,Kp\_cEpLyso,Kp\_int,Kp\_sm,Kp\_smMito,Kp\_smLyso,Kp\_imInt,Kp\_cEd,Kp\_cEdMito,Kp\_cEdLyso,Kp\_p];

G = [SaEp,SimEp,ScEp,ScEpMito,ScEpLyso,Sint,Ssm,SsmMito,SsmLyso,SimInt,ScEd,ScEdMito,ScEdLyso,Sp]';

```

% 4/30/2009
% 1CellPK based lung:alveoli model starts here (Rats)
% 12 compartments:
% aEp (surface lining liquied), imEp (Macrophage),
% cEp(epithelial cells),cEpMito(mito of cEp), cEpLyso (lyso of cEp)
% int(Interstitial),imInt(immune cells), sm(smooth muscle),
% cEd(endothelial cells), cEdMito(mito of cEd),cEdLyso (lyso of cEd), p(plasma)

```

```

function [M, G, M_v, Vp] = AT_al_RL()

```

```

%molecular physiochemical property

```

```

pKa = 100;
logPN = 0.16 ;
logPD = -1.57;
z = 1;

```

```

% Constant

```

```

T = 273.15+37;

```

```

R = 8.314;

```

```

F = 96484.56;

```

```

%lipid fraction

```

```

LaEp = 0.95;

```

```

LimEp = 0.05;

```

```

LcEp = 0.05 ;

```

```

Lint = 0;

```

```

LimInt = 0.05;

```

```

Lsm = 0;

```

```

LcEd = 0.05;

```

```

Lp = 0;

```

```

%volumetric water fraction=1-lipid fraction

```

```

WaEp = 1 - LaEp;

```

```

WimEp = 1 - LimEp;

```

```

WcEp = 1 - LcEp;

```

```

Wint = 1 - Lint;

```

```

WimInt = 1 - LimInt;

```

```

Wsm = 1 - Lsm;

```

```

WcEd = 1 - LcEd;

```

```

Wp = 1 - Lp;

```

```

%activity coefficient of species(N:neutral,D:desociated)

```

```

GaEpN = 1;

```

```

GaEpD = 1;

```

```

GimEpN = 1.23;

```

```

GimEpD = 0.74;

```

```

GcEpN = 1.23;

```

```

GcEpD = 0.74;

```

```

GintN = 1;

```

```

GintD = 1;

```

```

GimIntN = 1.23;

```

```

GimIntD = 0.74;

```

```

GsmN = 1.23;

```

```

GsmD = 0.74;

```

```

GcEdN = 1.23;

```

```

GcEdD = 0.74;

```

```

GpN = 1;

```

```

GpD = 1;

```

```

% By Jingyu Yu (used in publication) Areas and volumes (m^2, m^3) for 7 membranes and corresponding
compartments
AaEp = 0.387;%literature
AbEp = AaEp;% Assuming same with epical side
AimEp = 3.14*10^(-10)*0.89*10^(9)*3/100/2; % 10 um diameter, only half of surface gets contact with liquid,
since ASL = 5 um
AimInt = AimEp/10; % assuming number of immune cells is 1/10 of macrophage
Asm = 0;% No SM
AbEd = 0.452;%literature
AaEd = 0.452;%literature
% volumes for 8 compartments(m3)
ASL = 5; %literature um
VaEp = AaEp*ASL*10^(-6); % 5 um thickness
VcEp = AaEp*0.384*10^(-6); % 0.384, literature
VimEp = 0.89*10^(9)*3/100*1058*10^(-18);%number of macrophage(literature)*volume of macrophage
Vint = AaEp*0.693*10^(-6); % literature
VimInt = VimEp/10;% assuming number of immune cells is 1/10 of macrophage
Vsm = 10^(-30); % VcEp*10^(-12); % can be any number, surface is 0
VcEd = AbEd*0.358*10^(-6); %0.358 um thickness --literature
% Vp = 5; %total huge volume for lung absorption model

#####
% Subcellular compartments in cEp (epithelial cells) and cEd(endothelial cells)
% calculate constant
R_org = 0.1;

VcEpMito = R_org*VcEp ; % 10^(-30); %
VcEpLyso = R_org*VcEp ; % 10^(-30); %
VcEdMito = R_org*VcEd ; % 10^(-30); %
VcEdLyso = R_org*VcEd ; % 10^(-30); %

AcEpMito = 5.9924e+006*VcEpMito; % 0 ;
AcEpLyso = 5.9924e+006*VcEpLyso; % 0 ;
AcEdMito = 5.9924e+006*VcEdMito; % 0 ;
AcEdLyso = 5.9924e+006*VcEdLyso; % 0 ;
#####

M_v = diag([VaEp,VimEp,VcEp,VcEpMito,VcEpLyso,Vint,Vsm,VimInt,VcEd,VcEdMito,VcEdLyso]);
V_LUN = trace(M_v)*10^6;
Vp = 340*10^(-9)*V_LUN;

% Membrane potential (V)
EaEp = -0.0093;
EbEp = 0.0119;%0.0119;
EimEp = -0.06;
EimInt = -0.06;
Esm = -0.06;
EbEd = -0.06;
EaEd = -0.06;
% pH values
pHaEp = 7.4;
pHimEp = 7.0;
pHcEp = 7.0;
pHint = 7.0;
pHimInt = 7.0;

```

```

pHsm = 7.0;
pHcEd = 7.0;
pHp = 7.4;

%adjustment for logP
if ( abs(z-1) <= 10^(-6) )
    logP_nlipT = 0.33*logPN+2.2 ;
    logP_dlipT = 0.37*logPD+2 ;
end
if ( abs(z+1) <= 10^(-6) )
    logP_nlipT = 0.37*logPN+2.2 ;
    logP_dlipT = 0.33*logPD+2.6 ;
end
if ( abs(z-0) <= 10^(-5) )
    logP_nlipT = 0.33*logPN+2.2 ;
    logP_dlipT = 0.33*logPD+2.2 ;
end

% Get the first two decimals
logP_n = round(logP_nlipT*100)/100 ;
logP_d = round(logP_dlipT*100)/100 ;
%calculate the membrane permeability

Pn = 10^(logP_n-6.7)*60; % in 1/min
Pd = 10^(logP_d-6.7)*60; % in 1/min

i = -sign(z) ;
%calculate N for flux of ion happening at 7 membranes
C = z*F/(R*T);
NaEp = C*(-EaEp) ;
NbEp = C*EbEp ;
NimEp = C*EimEp ;
NimInt = C*EimInt ;
Nsm = C*Esm ;
NbEd = C*(-EbEd) ;
NaEd = C*(EaEd) ;

%calculate Kn and Kd for 8 compartments
N = 1.22*10^(logP_n);
D = 1.22*10^(logP_d);
Kd = D;

KaEpN = N*LaEp ;
KaEpD = D*LaEp ;
KimEpN = N*LimEp ;
KimEpD = D*LimEp;
KcEpN = N*LcEp ;
KcEpD = D*LcEp ;
KintN = N*Lint ;
KintD = D*Lint ;
KimIntN = N*LimInt ;
KimIntD = D*LimInt ;
KsmN = N*Lsm ;
KsmD = D*Lsm ;
KcEdN = N*LcEd ;
KcEdD = D*LcEd ;

```



KpN = N\*Lp ;  
KpD = D\*Lp ;

%#####

LcEpMito = 0.05 ;  
LcEpLyso = 0.05 ;  
LcEdMito = 0.05 ;  
LcEdLyso = 0.05 ;

WcEpMito = 1-LcEpMito ;  
WcEpLyso = 1-LcEpLyso ;  
WcEdMito = 1-LcEdMito ;  
WcEdLyso = 1-LcEdLyso ;

GcEpMitoN = 1.23 ;  
GcEpMitoD = 0.74 ;  
GcEpLysoN = 1.23 ;  
GcEpLysoD = 0.74 ;  
GcEdMitoN = 1.23 ;  
GcEdMitoD = 0.74 ;  
GcEdLysoN = 1.23 ;  
GcEdLysoD = 0.74 ;

EcEpMito = -0.16 ;  
EcEpLyso = +0.01 ;  
EcEdMito = -0.16 ;  
EcEdLyso = +0.01 ;

pHcEpMito = 8 ;  
pHcEpLyso = 5 ;  
pHcEdMito = 8 ;  
pHcEdLyso = 5 ;

NcEpMito = C\*EcEpMito ;  
NcEpLyso = C\*EcEpLyso ;  
NcEdMito = C\*EcEdMito ;  
NcEdLyso = C\*EcEdLyso ;

KcEpMitoN = N\*LcEpMito ;  
KcEpMitoD = D\*LcEpMito ;  
KcEpLysoN = N\*LcEpLyso ;  
KcEpLysoD = D\*LcEpLyso ;

KcEdMitoN = N\*LcEdMito ;  
KcEdMitoD = D\*LcEdMito ;  
KcEdLysoN = N\*LcEdLyso ;  
KcEdLysoD = D\*LcEdLyso ;

fcEpMitoN = 1/(WcEpMito/GcEpMitoN+KcEpMitoN/GcEpMitoN+WcEpMito\*10^(i\*(pHcEpMito-pKa)))/GcEpMitoD...  
+KcEpMitoD\*10^(i\*(pHcEpMito-pKa))/GcEpMitoD);  
fcEpMitoD = fcEpMitoN\*10^(i\*(pHcEpMito-pKa));

```

fcEpLysoN = 1/(WcEpLyso/GcEpLysoN+KcEpLysoN/GcEpLysoN+WcEpLyso*10^(i*(pHcEpLyso-
pKa))/GcEpLysoD...
+KcEpLysoD*10^(i*(pHcEpLyso-pKa))/GcEpLysoD);
fcEpLysoD = fcEpLysoN*10^(i*(pHcEpLyso-pKa));

```

```

fcEdMitoN = 1/(WcEdMito/GcEdMitoN+KcEdMitoN/GcEdMitoN+WcEdMito*10^(i*(pHcEdMito-
pKa))/GcEdMitoD...
+KcEdMitoD*10^(i*(pHcEdMito-pKa))/GcEdMitoD);
fcEdMitoD = fcEdMitoN*10^(i*(pHcEdMito-pKa));

```

```

fcEdLysoN = 1/(WcEdLyso/GcEdLysoN+KcEdLysoN/GcEdLysoN+WcEdLyso*10^(i*(pHcEdLyso-
pKa))/GcEdLysoD...
+KcEdLysoD*10^(i*(pHcEdLyso-pKa))/GcEdLysoD);
fcEdLysoD = fcEdLysoN*10^(i*(pHcEdLyso-pKa));

```

```

%#####

```

```

%compute the fn and fd for 8 compartments

```

```

faEpN = 1/(WaEp/GaEpN+KaEpN/GaEpN+WaEp*10^(i*(pHaEp-pKa))/GaEpD...
+KaEpD*10^(i*(pHaEp-pKa))/GaEpD);
faEpD = faEpN*10^(i*(pHaEp-pKa));
fimEpN = 1/(WimEp/GimEpN+KimEpN/GimEpN+WimEp*10^(i*(pHimEp-pKa))/GimEpD...
+KimEpD*10^(i*(pHimEp-pKa))/GimEpD);
fimEpD = fimEpN*10^(i*(pHimEp-pKa));
fcEpN = 1/(WcEp/GcEpN+KcEpN/GcEpN+WcEp*10^(i*(pHcEp-pKa))/GcEpD...
+KcEpD*10^(i*(pHcEp-pKa))/GcEpD);
fcEpD = fcEpN*10^(i*(pHcEp-pKa));
fintN = 1/(Wint/GintN+KintN/GintN+Wint*10^(i*(pHint-pKa))/GintD...
+KintD*10^(i*(pHint-pKa))/GintD);
fintD = fintN*10^(i*(pHint-pKa));
fimIntN = 1/(WimInt/GimIntN+KimIntN/GimIntN+WimInt*10^(i*(pHimInt-pKa))/GimIntD...
+KimIntD*10^(i*(pHimInt-pKa))/GimIntD);
fimIntD = fimIntN*10^(i*(pHimInt-pKa));
fsmN = 1/(Wsm/GsmN+KsmN/GsmN+Wsm*10^(i*(pHsm-pKa))/GsmD...
+KsmD*10^(i*(pHsm-pKa))/GsmD);
fsmD = fsmN*10^(i*(pHsm-pKa));
fcEdN = 1/(WcEd/GcEdN+KcEdN/GcEdN+WcEd*10^(i*(pHcEd-pKa))/GcEdD...
+KcEdD*10^(i*(pHcEd-pKa))/GcEdD);
fcEdD = fcEdN*10^(i*(pHcEd-pKa));
fpN = 1/(Wp/GpN+KpN/GpN+Wp*10^(i*(pHp-pKa))/GpD...
+KpD*10^(i*(pHp-pKa))/GpD);
fpD = fpN*10^(i*(pHp-pKa));

```

```

%mucus clearance

```

```

%Ke = 0.02;
Ke = 0;

```

```

%compute the coefficient matrix for ODEs

```

```

% #1: Surface Lining Liquid (aEp)

```

```

KaEp_aEp = AaEp/VaEp*(Pn*(-faEpN)+Pd*NaEp/(exp(NaEp)-1)*(-faEpD)*exp(NaEp))...
-AimEp/VaEp*(Pn*faEpN+Pd*NimEp/(exp(NimEp)-1)*faEpD)...
-Ke;
KaEp_imEp = -AimEp/VaEp*(Pn*(-fimEpN)+Pd*NimEp/(exp(NimEp)-1)*(-fimEpD)*exp(NimEp));
KaEp_cEp = AaEp/VaEp*(Pn*(fcEpN)+Pd*NaEp/(exp(NaEp)-1)*(fcEpD));
KaEp_cEpMito = 0;

```

```

KaEp_cEpLyso = 0;
KaEp_int = 0;
KaEp_sm = 0;
KaEp_imInt = 0;
KaEp_cEd = 0;
KaEp_cEdMito = 0;
KaEp_cEdLyso = 0;
KaEp_p = 0;
SaEp = 0;

% #2: Macrophage (imEp)
KimEp_aEp = AimEp/VimEp*(Pn*faEpN+Pd*NimEp/(exp(NimEp)-1)*faEpD);
KimEp_imEp = AimEp/VimEp*(Pn*(-fimEpN)+Pd*NimEp/(exp(NimEp)-1)*(-fimEpD)*exp(NimEp));
KimEp_cEp = 0;
KimEp_cEpMito = 0 ;
KimEp_cEpLyso = 0 ;
KimEp_int = 0;
KimEp_sm = 0;
KimEp_imInt = 0;
KimEp_cEd = 0;
KimEp_cEdMito = 0 ;
KimEp_cEdLyso = 0 ;
KimEp_p = 0;
SimEp = 0;

% #3: Epithelial Cells (cEp)
KcEp_aEp = -AaEp/VcEp*(Pn*(-faEpN)+Pd*NaEp/(exp(NaEp)-1)*(-faEpD)*exp(NaEp));
KcEp_imEp = 0;
KcEp_cEp = -AaEp/VcEp*(Pn*(fcEpN)+Pd*NaEp/(exp(NaEp)-1)*(fcEpD))...
-AcEpMito/VcEp*(Pn*fcEpN+Pd*NcEpMito/(exp(NcEpMito)-1)*fcEpD)...
-AcEpLyso/VcEp*(Pn*fcEpN+Pd*NcEpLyso/(exp(NcEpLyso)-1)*fcEpD)...
+ AbEp/VcEp*(Pn*(-fcEpN)+Pd*NbEp/(exp(NbEp)-1)*(-fcEpD)*exp(NbEp));
KcEp_cEpMito = -AcEpMito/VcEp*(Pn*(-fcEpMitoN)+Pd*NcEpMito/(exp(NcEpMito)-1)*(-fcEpMitoD)*exp(NcEpMito)) ;
KcEp_cEpLyso = -AcEpLyso/VcEp*(Pn*(-fcEpLysoN)+Pd*NcEpLyso/(exp(NcEpLyso)-1)*(-fcEpLysoD)*exp(NcEpLyso)) ;
KcEp_int = AbEp/VcEp*(Pn*(fintN)+Pd*NbEp/(exp(NbEp)-1)*(fintD));
KcEp_sm = 0;
KcEp_imInt = 0;
KcEp_cEd = 0;
KcEp_cEdMito = 0 ;
KcEp_cEdLyso = 0 ;
KcEp_p = 0;
ScEp = 0;

% #4: : Epithelial Cells (cEpMito)
KcEpMito_aEp = 0;
KcEpMito_imEp = 0;
KcEpMito_cEp = AcEpMito/VcEpMito*(Pn*(fcEpN)+Pd*NcEpMito/(exp(NcEpMito)-1)*(fcEpD));
KcEpMito_cEpMito = AcEpMito/VcEpMito*(Pn*(-fcEpMitoN)+Pd*NcEpMito/(exp(NcEpMito)-1)*(-fcEpMitoD)*exp(NcEpMito));
KcEpMito_cEpLyso = 0 ;
KcEpMito_int = 0 ;
KcEpMito_sm = 0;
KcEpMito_imInt = 0;
KcEpMito_cEd = 0;

```

```

KcEpMito_cEdMito = 0 ;
KcEpMito_cEdLyso = 0 ;
KcEpMito_p = 0;
ScEpMito = 0;

```

#### % #5: : Epithelial Cells (cEpLyso)

```

KcEpLyso_aEp = 0;
KcEpLyso_imEp = 0;
KcEpLyso_cEp = AcEpLyso/VcEpLyso*(Pn*(fcEpN)+Pd*NcEpLyso/(exp(NcEpLyso)-1)*(fcEpD));
KcEpLyso_cEpMito = 0 ;
KcEpLyso_cEpLyso = AcEpLyso/VcEpLyso*(Pn*(-fcEpLysoN)+Pd*NcEpLyso/(exp(NcEpLyso)-1)*(-fcEpLysoD)*exp(NcEpLyso));
KcEpLyso_int = 0 ;
KcEpLyso_sm = 0;
KcEpLyso_imInt = 0;
KcEpLyso_cEd = 0;
KcEpLyso_cEdMito = 0 ;
KcEpLyso_cEdLyso = 0 ;
KcEpLyso_p = 0;
ScEpLyso = 0;

```

#### % #6: : Interstitium (int)

```

Kint_aEp = 0;
Kint_imEp = 0;
Kint_cEp = -AbEp/Vint*(Pn*(-fcEpN)+Pd*NbEp/(exp(NbEp)-1)*(-fcEpD)*exp(NbEp));
Kint_cEpMito = 0 ;
Kint_cEpLyso = 0 ;
Kint_int = -AbEp/Vint*(Pn*(fintN)+Pd*NbEp/(exp(NbEp)-1)*(fintD))...
    -Asm/Vint*(Pn*fintN+Pd*Nsm/(exp(Nsm)-1)*fintD)...
    -AimInt/Vint*(Pn*fintN+Pd*NimInt/(exp(NimInt)-1)*fintD)...
    +AbEd/Vint*(Pn*(-fintN)+Pd*NbEd/(exp(NbEd)-1)*(-fintD)*exp(NbEd));
Kint_sm = -Asm/Vint*(Pn*(-fsmN)+Pd*Nsm/(exp(Nsm)-1)*(-fsmD)*exp(Nsm));
Kint_imInt = -AimInt/Vint*(Pn*(-fimIntN)+Pd*NimInt/(exp(NimInt)-1)*(-fimIntD)*exp(NimInt));
Kint_cEd = AbEd/Vint*(Pn*(fcEdN)+Pd*NbEd/(exp(NbEd)-1)*(fcEdD));
Kint_cEdMito = 0 ;
Kint_cEdLyso = 0 ;
Kint_p = 0;
Sint = 0;

```

#### % #7: Smooth Muscle (sm)

```

Ksm_aEp = 0;
Ksm_imEp = 0;
Ksm_cEp = 0;
Ksm_cEpMito = 0 ;
Ksm_cEpLyso = 0 ;
Ksm_int = Asm/Vsm*(Pn*fintN+Pd*Nsm/(exp(Nsm)-1)*fintD);
Ksm_sm = Asm/Vsm*(Pn*(-fsmN)+Pd*Nsm/(exp(Nsm)-1)*(-fsmD)*exp(Nsm));
Ksm_imInt = 0;
Ksm_cEd = 0;
Ksm_cEdMito = 0 ;
Ksm_cEdLyso = 0 ;
Ksm_p = 0;
Ssm = 0;

```

% #8: Immune Cells (imInt)

```
KimInt_aEp = 0;
KimInt_imEp = 0;
KimInt_cEp = 0;
KimInt_cEpMito = 0;
KimInt_cEpLyso = 0;
KimInt_int = AimInt/VimInt*(Pn*fintN+Pd*NimInt/(exp(NimInt)-1)*fintD);
KimInt_sm = 0;
KimInt_imInt = AimInt/VimInt*(Pn*(-fimIntN)+Pd*NimInt/(exp(NimInt)-1)*(-fimIntD)*exp(NimInt));
KimInt_cEd = 0;
KimInt_cEdMito = 0;
KimInt_cEdLyso = 0;
KimInt_p = 0;
SimInt = 0;
```

% #9: Endothelial celss (cEd)

```
KcEd_aEp = 0;
KcEd_imEp = 0;
KcEd_cEp = 0;
KcEd_cEpMito = 0;
KcEd_cEpLyso = 0;
KcEd_int = -AbEd/VcEd*(Pn*(-fintN)+Pd*NbEd/(exp(NbEd)-1)*(-fintD)*exp(NbEd));
KcEd_sm = 0;
KcEd_imInt = 0;
KcEd_cEd = -AbEd/VcEd*(Pn*(fcEdN)+Pd*NbEd/(exp(NbEd)-1)*(fcEdD))...
    -AcEdMito/VcEd*(Pn*fcEdN+Pd*NcEdMito/(exp(NcEdMito)-1)*fcEdD)...
    -AcEdLyso/VcEd*(Pn*fcEdN+Pd*NcEdLyso/(exp(NcEdLyso)-1)*fcEdD)...
    +AaEd/VcEd*(Pn*(-fcEdN)+Pd*NaEd/(exp(NaEd)-1)*(-fcEdD)*exp(NaEd));
KcEd_cEdMito = -AcEdMito/VcEd*(Pn*(-fcEdMitoN)+Pd*NcEdMito/(exp(NcEdMito)-1)*(-fcEdMitoD)*exp(NcEdMito));
KcEd_cEdLyso = -AcEdLyso/VcEd*(Pn*(-fcEdLysoN)+Pd*NcEdLyso/(exp(NcEdLyso)-1)*(-fcEdLysoD)*exp(NcEdLyso));
KcEd_p = AaEd/VcEd*(Pn*(fpN)+Pd*NaEd/(exp(NaEd)-1)*(fpD));
ScEd = 0;
```

% #10: Endothelial celss (cEd) Mito

```
KcEdMito_aEp = 0;
KcEdMito_imEp = 0;
KcEdMito_cEp = 0;
KcEdMito_cEpMito = 0;
KcEdMito_cEpLyso = 0;
KcEdMito_int = 0;
KcEdMito_sm = 0;
KcEdMito_imInt = 0;
KcEdMito_cEd = AcEdMito/VcEdMito*(Pn*(fcEdN)+Pd*NcEdMito/(exp(NcEdMito)-1)*(fcEdD)) ;
KcEdMito_cEdMito = AcEdMito/VcEdMito*(Pn*(-fcEdMitoN)+Pd*NcEdMito/(exp(NcEdMito)-1)*(-fcEdMitoD)*exp(NcEdMito));
KcEdMito_cEdLyso = 0;
KcEdMito_p = 0 ;
ScEdMito = 0;
```

% #11: Endothelial celss (cEd) Lyso

```
KcEdLyso_aEp = 0;
KcEdLyso_imEp = 0;
KcEdLyso_cEp = 0;
```

```

KcEdLyso_cEpMito = 0;
KcEdLyso_cEpLyso = 0;
KcEdLyso_int = 0 ;
KcEdLyso_sm = 0;
KcEdLyso_imInt = 0;
KcEdLyso_cEd = AcEdLyso/VcEdLyso*(Pn*(fcEdN)+Pd*NcEdLyso/(exp(NcEdLyso)-1)*(fcEdD)) ;
KcEdLyso_cEdMito = 0;
KcEdLyso_cEdLyso = AcEdLyso/VcEdLyso*(Pn*(-fcEdLysoN)+Pd*NcEdLyso/(exp(NcEdLyso)-1)*(-fcEdLysoD)*exp(NcEdLyso));
KcEdLyso_p = 0;
ScEdLyso = 0;

```

```

% #12: plasma(p)

```

```

Kp_aEp = 0;
Kp_imEp = 0;
Kp_cEp = 0;
Kp_cEpMito = 0;
Kp_cEpLyso = 0;
Kp_int = 0;
Kp_sm = 0;
Kp_imInt = 0;
Kp_cEd = -AaEd/Vp*(Pn*(-fcEdN)+Pd*NaEd/(exp(NaEd)-1)*(-fcEdD)*exp(NaEd));
Kp_cEdMito = 0;
Kp_cEdLyso = 0;
Kp_p = -AaEd/Vp*(Pn*(fpN)+Pd*NaEd/(exp(NaEd)-1)*(fpD));
Sp = 0;

```

```

M =

```

```

[KaEp_aEp,KaEp_imEp,KaEp_cEp,KaEp_cEpMito,KaEp_cEpLyso,KaEp_int,KaEp_sm,KaEp_imInt,KaEp_cEd,KaEp_cEdMito,KaEp_cEdLyso,KaEp_p;...

```

```

KimEp_aEp,KimEp_imEp,KimEp_cEp,KimEp_cEpMito,KimEp_cEpLyso,KimEp_int,KimEp_sm,KimEp_imInt,KimEp_cEd,KimEp_cEdMito,KimEp_cEdLyso,KimEp_p;...

```

```

KcEp_aEp,KcEp_imEp,KcEp_cEp,KcEp_cEpMito,KcEp_cEpLyso,KcEp_int,KcEp_sm,KcEp_imInt,KcEp_cEd,KcEp_cEdMito,KcEp_cEdLyso,KcEp_p;...

```

```

KcEpMito_aEp,KcEpMito_imEp,KcEpMito_cEp,KcEpMito_cEpMito,KcEpMito_cEpLyso,KcEpMito_int,KcEpMito_sm,KcEpMito_imInt,KcEpMito_cEd,KcEpMito_cEdMito,KcEpMito_cEdLyso,KcEpMito_p;...

```

```

KcEpLyso_aEp,KcEpLyso_imEp,KcEpLyso_cEp,KcEpLyso_cEpMito,KcEpLyso_cEpLyso,KcEpLyso_int,KcEpLyso_sm,KcEpLyso_imInt,KcEpLyso_cEd,KcEpLyso_cEdMito,KcEpLyso_cEdLyso,KcEpLyso_p;...

```

```

Kint_aEp,Kint_imEp,Kint_cEp,Kint_cEpMito,Kint_cEpLyso,Kint_int,Kint_sm,Kint_imInt,Kint_cEd,Kint_cEdMito,Kint_cEdLyso,Kint_p;...

```

```

Ksm_aEp,Ksm_imEp,Ksm_cEp,Ksm_cEpMito,Ksm_cEpLyso,Ksm_int,Ksm_sm,Ksm_imInt,Ksm_cEd,Ksm_cEdMito,Ksm_cEdLyso,Ksm_p;...

```

```

KimInt_aEp,KimInt_imEp,KimInt_cEp,KimInt_cEpMito,KimInt_cEpLyso,KimInt_int,KimInt_sm,KimInt_imInt,KimInt_cEd,KimInt_cEdMito,KimInt_cEdLyso,KimInt_p;...

```

```

KcEd_aEp,KcEd_imEp,KcEd_cEp,KcEd_cEpMito,KcEd_cEpLyso,KcEd_int,KcEd_sm,KcEd_imInt,KcEd_cEd,KcEd_cEdMito,KcEd_cEdLyso,KcEd_p;...

```

KcEdMito\_aEp,KcEdMito\_imEp,KcEdMito\_cEp,KcEdMito\_cEpMito,KcEdMito\_cEpLyso,KcEdMito\_int,KcEdMito\_sm,KcEdMito\_imInt,KcEdMito\_cEd,KcEdMito\_cEdMito,KcEdMito\_cEdLyso,KcEdMito\_p;...

KcEdLyso\_aEp,KcEdLyso\_imEp,KcEdLyso\_cEp,KcEdLyso\_cEpMito,KcEdLyso\_cEpLyso,KcEdLyso\_int,KcEdLyso\_sm,KcEdLyso\_imInt,KcEdLyso\_cEd,KcEdLyso\_cEdMito,KcEdLyso\_cEdLyso,KcEdLyso\_p;...

Kp\_aEp,Kp\_imEp,Kp\_cEp,Kp\_cEpMito,Kp\_cEpLyso,Kp\_int,Kp\_sm,Kp\_imInt,Kp\_cEd,Kp\_cEdMito,Kp\_cEdLyso,Kp\_p];

G = [SaEp,SimEp,ScEp,ScEpMito,ScEpLyso,Sint,Ssm,SimInt,ScEd,ScEdMito,ScEdLyso,Sp]';

```

% By J YU. @ 5/5/2010
% This is the generic PBPK model of atenolol in rat
% Virtual Lung (with Mito and Lyso in cEp and cEd) - PBPK
% Six big compartment model: arterial blood, lung, venous blood, liver, brain, and rest

function [dConc] = AT_Lung_RL(t,Conc)
global V_VEN Vp fup B2P Vtot;
%call lung model
[LungM, LungG, M_v, Vp] = AT_al_RL(); % get the coefficients for the Alveolar Region
[LungM_Airways, LungG_Airways, M_v_Airways, Vp_Airways] = AT_aw_RL(); % get the coefficients for the
airways

BW = 0.25 ;

% From PATRICK POULIN, FRANK-PETER. THEILPrediction of Pharmacokinetics prior to In Vivo Studies.
% II. Generic Physiologically Based Pharmacokinetic Models of Drug Disposition
% Blood flow rate (mL/min)

Q_tot = 0.235*BW^0.75*1000 ; % Total cardiac output = 0.235 * body weight (kg)^0.75 (L/min)
Q_LUN = Q_tot ;
Q_HRT = 0.049*Q_tot ;
Q_BRA = 0.02*Q_tot ;
Q_LIV = 0.175*Q_tot ;
Q_GUT = 0.131*Q_tot ;
Q_KID = 0.141*Q_tot ;
Q_MUS = 0.278*Q_tot ;
Q_SKN = 0.058*Q_tot ;
Q_ADI = 0.07*Q_tot ;
Q_SPL = 0.02*Q_tot ;
Q_BON = 0.122*Q_tot ;
Q_Airways = 0.01*Q_tot;
Q_RES = Q_tot - Q_HRT - Q_BRA - Q_LIV - Q_KID - Q_MUS - Q_SKN - Q_ADI - Q_BON - Q_Airways ;

% From PATRICK POULIN, FRANK-PETER. THEILPrediction of Pharmacokinetics prior to In Vivo Studies.
% II. Generic Physiologically Based Pharmacokinetic Models of Drug Disposition
% Volume of each organ (mL)= fraction of total body volume (L/kg)*BW*1000
V_ART = 0.0272*BW*1000 ;
V_LUN = trace(M_v)*10^6; % total lung volume, in mL
V_LUNp = Vp*10^(6) ; % plasma volume in the lung, obtained from 'LungRatReverse' (in m^3), converted to mL
V_LUNb = 519*10^(-3)*V_LUN ; % total blood volume in the lung = 519uL/g
V_VEN = 0.0544*BW*1000 ;
V_HRT = 0.0033*BW*1000 ;
V_BRA = 0.0057*BW*1000 ;
V_LIV = 0.0366*BW*1000 ;
V_GUT = 0.027*BW*1000 ;
V_KID = 0.0073*BW*1000 ;
V_MUS = 0.404*BW*1000 ;
V_SKN = 0.19*BW*1000 ;
V_ADI = 0.076*BW*1000 ;
V_SPL = 0.002*BW*1000 ;
V_BON = 0.04148*BW*1000 ;
V_LUN_Airways = trace(M_v_Airways)*10^6 ;
V_LUNp_Airways = Vp_Airways*10^(6) ;
V_LUNb_Airways = 519*10^(-3)*V_LUN_Airways ;

```



V\_RES = BW\*1000-V\_ART-V\_LUN-V\_LUNp-V\_LUNb-V\_LUN\_Airways-V\_LUNp\_Airways-  
V\_LUNb\_Airways-V\_VEN - V\_HRT...  
-V\_BRA-V\_LIV-V\_GUT-V\_KID-V\_MUS-V\_SKN-V\_ADI-V\_SPL-V\_BON ;

% Tissue : Blood partition coefficient = K(Tissue:Plasma)/B2P

B2P = 0.80 ;

fup = 0.13 ;

Kp\_LUN = 54.90/B2P ; % exp data

Kp\_HRT = 4.97/B2P ; % exp data

Kp\_BRA = 9.20/B2P ; % exp data

Kp\_LIV = 5.67/B2P ;

Kp\_GUT = 8.22/B2P ;

Kp\_KID = 3.80/B2P ; % exp data

Kp\_MUS = 2.20/B2P ; % exp data

Kp\_SKN = 7.22/B2P ;

Kp\_ADI = 0.18/B2P ;

Kp\_SPL = 2.98/B2P ;

Kp\_BON = 6.90/B2P ;

Kp\_RES = 1/B2P ;

% Dosing Infusion information mg/kg, rats weight = 0.25kg

Kiv = 0 ;

% Mass balance

% 1 - Arterial, ART

% 2 - Lung alveoli plasma free concentration, LUN,

% Cellular compartments of the lung alveoli:

% 15 - Surface lining liquid (aEp)

% 16 - Macrophage (imEp)

% 17 - Epithelial cells (cEp)

% 18 - Epithelial cells Mito (cEpMito)

% 19 - Epithelial cells Lyso (cEpLyso)

% 20 - Interstitium (int)

% 21 - Smooth muscle (sm)

% 22 - Immune cells (imInt)

% 23 - Endothelial cells (cEd)

% 24 - Endothelial cells Mito (cEdMito)

% 25 - Endothelial cells Lyso (cEdLyso)

% 3 - Venous, VEN

% 4 - Heart, HRT

% 5 - Brain, BRA

% 6 - Liver, LIV, may be eliminatin organ

% 7 - Gut, GUT

% 8 - Spleen, SPL

% 9 - Kidney, KID, may be elimination organ

% 10 - Muscle, MUS

% 11 - Skin, SKN

% 12 - Adipose, ADI

% 13 - Bone, BON

% 14 - Rest of body, RES

% 26 - Lung airway plasma free concentration, LUN\_airways

% Cellular compartments of the lung airways:

% 27 - Surface lining liquid (aEp\_airway)

% 28 - Macrophage (imEp\_airway)

% 29 - Epithelial cells (cEp\_airway)

% 30 - Epithelial cells Mito (cEpMito\_airway)  
 % 31 - Epithelial cells Lyso (cEpLyso\_airway)  
 % 32 - Interstitium (int\_airway)  
 % 33 - Smooth muscle (sm\_airway)  
 % 34 - Smooth muscle Mito (smMito\_airway)  
 % 35 - Smooth muscle Lyso (smLyso\_airway)  
 % 36 - Immune cells (imInt\_airway)  
 % 37 - Endothelial cells (cEd\_airway)  
 % 38 - Endothelial cells Mito (cEdMito\_airway)  
 % 39 - Endothelial cells Lyso (cEdLyso\_airway)

% fup: fraction of unbound in the plasma  
 % Kp: Tissue:Blood partition coefficients = C\_tissue, tot : C\_blood, tot

dConc(1) = Conc(2)\*Q\_tot/V\_ART - Conc(1)\*Q\_tot/V\_ART ; % ART, arterial blood

dConc(2) = Conc(3)\*Q\_tot/V\_LUNb + (LungM(12,1)\*Conc(15) + LungM(12,2)\*Conc(16) +  
 LungM(12,3)\*Conc(17) + LungM(12,4)\*Conc(18)...  
 + LungM(12,5)\*Conc(19) + LungM(12,6)\*Conc(21) + LungM(12,7)\*Conc(21) + LungM(12,8)\*Conc(22) +  
 LungM(12,9)\*Conc(23) ...  
 + LungM(12,10)\*Conc(24) + LungM(12,11)\*Conc(25) + LungM(12,12)\*Conc(2)\*fup/B2P +  
 LungG(12))\*V\_LUNp/V\_LUNb - Conc(2)\*Q\_tot/V\_LUNb ;  
 % 2 -Lung total blood concentration,C(2)\*fup/B2P = free plasma conc in the  
 lung alveoli

dConc(15) = LungM(1,1)\*Conc(15) + LungM(1,2)\*Conc(16) + LungM(1,3)\*Conc(17) + LungM(1,4)\*Conc(18)  
 + LungM(1,5)\*Conc(19)...  
 + LungM(1,6)\*Conc(20) + LungM(1,7)\*Conc(21) + LungM(1,8)\*Conc(22) + LungM(1,9)\*Conc(23) +  
 LungM(1,10)\*Conc(24)...  
 + LungM(1,11)\*Conc(25) + LungM(1,12)\*Conc(2)\*fup/B2P + LungG(1); % 15 -  
 SurfaConce lining liquid (aEp)

dConc(16) = LungM(2,1)\*Conc(15) + LungM(2,2)\*Conc(16) + LungM(2,3)\*Conc(17) + LungM(2,4)\*Conc(18)  
 + LungM(2,5)\*Conc(19)...  
 + LungM(2,6)\*Conc(20) + LungM(2,7)\*Conc(21) + LungM(2,8)\*Conc(22) + LungM(2,9)\*Conc(23) +  
 LungM(2,10)\*Conc(24)...  
 + LungM(2,11)\*Conc(25) + LungM(2,12)\*Conc(2)\*fup/B2P + LungG(2); % 16 -  
 Macrophage (imEp)

dConc(17) = LungM(3,1)\*Conc(15) + LungM(3,2)\*Conc(16) + LungM(3,3)\*Conc(17) + LungM(3,4)\*Conc(18)  
 + LungM(3,5)\*Conc(19)...  
 + LungM(3,6)\*Conc(20) + LungM(3,7)\*Conc(21) + LungM(3,8)\*Conc(22) + LungM(3,9)\*Conc(23) +  
 LungM(3,10)\*Conc(24)...  
 + LungM(3,11)\*Conc(25) + LungM(3,12)\*Conc(2)\*fup/B2P + LungG(3); % 17 -  
 Epithelial cells (cEp)

dConc(18) = LungM(4,1)\*Conc(15) + LungM(4,2)\*Conc(16) + LungM(4,3)\*Conc(17) + LungM(4,4)\*Conc(18)  
 + LungM(4,5)\*Conc(19)...  
 + LungM(4,6)\*Conc(20) + LungM(4,7)\*Conc(21) + LungM(4,8)\*Conc(22) + LungM(4,9)\*Conc(23) +  
 LungM(4,10)\*Conc(24)...  
 + LungM(4,11)\*Conc(25) + LungM(4,12)\*Conc(2)\*fup/B2P + LungG(4); % 18 -  
 Epithelial cells (cEpMito)

dConc(19) = LungM(5,1)\*Conc(15) + LungM(5,2)\*Conc(16) + LungM(5,3)\*Conc(17) + LungM(5,4)\*Conc(18)  
 + LungM(5,5)\*Conc(19)...

+ LungM(5,6)\*Conc(20) + LungM(5,7)\*Conc(21) + LungM(5,8)\*Conc(22) + LungM(5,9)\*Conc(23) + LungM(5,10)\*Conc(24)...  
 + LungM(5,11)\*Conc(25) + LungM(5,12)\*Conc(2)\*fup/B2P + LungG(5); % 19 -  
 Epithelial cells (cEpLyso)

dConc(20) = LungM(6,1)\*Conc(15) + LungM(6,2)\*Conc(16) + LungM(6,3)\*Conc(17) + LungM(6,4)\*Conc(18) + LungM(6,5)\*Conc(19)...  
 + LungM(6,6)\*Conc(20) + LungM(6,7)\*Conc(21) + LungM(6,8)\*Conc(22) + LungM(6,9)\*Conc(23) + LungM(6,10)\*Conc(24)...  
 + LungM(6,11)\*Conc(25) + LungM(6,12)\*Conc(2)\*fup/B2P + LungG(6); % 20 -  
 Interstitium (int)

dConc(21) = LungM(7,1)\*Conc(15) + LungM(7,2)\*Conc(16) + LungM(7,3)\*Conc(17) + LungM(7,4)\*Conc(18) + LungM(7,5)\*Conc(19)...  
 + LungM(7,6)\*Conc(20) + LungM(7,7)\*Conc(21) + LungM(7,8)\*Conc(22) + LungM(7,9)\*Conc(23) + LungM(7,10)\*Conc(24)...  
 + LungM(7,11)\*Conc(25) + LungM(7,12)\*Conc(2)\*fup/B2P + LungG(7); % 21 -  
 Smooth muscle (sm)

dConc(22) = LungM(8,1)\*Conc(15) + LungM(8,2)\*Conc(16) + LungM(8,3)\*Conc(17) + LungM(8,4)\*Conc(18) + LungM(8,5)\*Conc(19)...  
 + LungM(8,6)\*Conc(20) + LungM(8,7)\*Conc(21) + LungM(8,8)\*Conc(22) + LungM(8,9)\*Conc(23) + LungM(8,10)\*Conc(24)...  
 + LungM(8,11)\*Conc(25) + LungM(8,12)\*Conc(2)\*fup/B2P + LungG(8); % 22 -  
 Immune cells (imInt)

dConc(23) = LungM(9,1)\*Conc(15) + LungM(9,2)\*Conc(16) + LungM(9,3)\*Conc(17) + LungM(9,4)\*Conc(18) + LungM(9,5)\*Conc(19)...  
 + LungM(9,6)\*Conc(20) + LungM(9,7)\*Conc(21) + LungM(9,8)\*Conc(22) + LungM(9,9)\*Conc(23) + LungM(9,10)\*Conc(24)...  
 + LungM(9,11)\*Conc(25) + LungM(9,12)\*Conc(2)\*fup/B2P + LungG(9); % 23 -  
 Endothelial cells (cEd)

dConc(24) = LungM(10,1)\*Conc(15) + LungM(10,2)\*Conc(16) + LungM(10,3)\*Conc(17) + LungM(10,4)\*Conc(18) + LungM(10,5)\*Conc(19)...  
 + LungM(10,6)\*Conc(20) + LungM(10,7)\*Conc(21) + LungM(10,8)\*Conc(22) + LungM(10,9)\*Conc(23) + LungM(10,10)\*Conc(24)...  
 + LungM(10,11)\*Conc(25) + LungM(10,12)\*Conc(2)\*fup/B2P + LungG(10); % 24 -  
 Endothelial cells (cEdMito)

dConc(25) = LungM(11,1)\*Conc(15) + LungM(11,2)\*Conc(16) + LungM(11,3)\*Conc(17) + LungM(11,4)\*Conc(18) + LungM(11,5)\*Conc(19)...  
 + LungM(11,6)\*Conc(20) + LungM(11,7)\*Conc(21) + LungM(11,8)\*Conc(22) + LungM(11,9)\*Conc(23) + LungM(11,10)\*Conc(24)...  
 + LungM(11,11)\*Conc(25) + LungM(11,12)\*Conc(2)\*fup/B2P + LungG(11); % 25 -  
 Endothelial cells (cEdLyso)

dConc(3) = Conc(4)\*Q\_HRT/Kp\_HRT/V\_VEN + Conc(5)\*Q\_BRA/Kp\_BRA/V\_VEN + Conc(6)\*Q\_LIV/Kp\_LIV/V\_VEN...  
 + Conc(9)\*Q\_KID/Kp\_KID/V\_VEN + Conc(10)\*Q\_MUS/Kp\_MUS/V\_VEN + Conc(11)\*Q\_SKN/Kp\_SKN/V\_VEN...  
 + Conc(12)\*Q\_ADI/Kp\_ADI/V\_VEN + Conc(13)\*Q\_BON/Kp\_BON/V\_VEN + Conc(14)\*Q\_RES/Kp\_RES/V\_VEN...  
 + Conc(26)\*Q\_Airways/V\_VEN - Conc(3)\*Q\_tot/V\_VEN + Kiv/V\_VEN ; % Venous blood

dConc(4) = Conc(1)\*Q\_HRT/V\_HRT - Conc(4)\*Q\_HRT/Kp\_HRT/V\_HRT ; % Heart  
dConc(5) = Conc(1)\*Q\_BRA/V\_BRA - Conc(5)\*Q\_BRA/Kp\_BRA/V\_BRA ; % Brain

E\_LIV = 0;  
dConc(6) = (((Q\_LIV-Q\_GUT-Q\_SPL)\*Conc(1)+(Q\_GUT\*Conc(7)/Kp\_GUT + Q\_SPL\*Conc(8)/Kp\_SPL -  
Q\_LIV\*Conc(6)/Kp\_LIV))/V\_LIV)...  
- (((Q\_LIV-Q\_GUT-Q\_SPL)\*Conc(1)+(Q\_GUT\*Conc(7)/Kp\_GUT +  
Q\_SPL\*Conc(8)/Kp\_SPL))\*E\_LIV))/V\_LIV ;

dConc(7) = Conc(1)\*Q\_GUT/V\_GUT - Conc(7)\*Q\_GUT/Kp\_GUT/V\_GUT ; % Gut  
dConc(8) = Conc(1)\*Q\_SPL/V\_SPL - Conc(8)\*Q\_SPL/Kp\_SPL/V\_SPL ; % Spleen  
dConc(9) = Conc(1)\*Q\_KID/V\_KID - Conc(9)\*Q\_KID/Kp\_KID/V\_KID ; % Kidney  
dConc(10) = Conc(1)\*Q\_MUS/V\_MUS - Conc(10)\*Q\_MUS/Kp\_MUS/V\_MUS ; %

Muscle

dConc(11) = Conc(1)\*Q\_SKN/V\_SKN - Conc(11)\*Q\_SKN/Kp\_SKN/V\_SKN ; % Skin  
dConc(12) = Conc(1)\*Q\_ADI/V\_ADI - Conc(12)\*Q\_ADI/Kp\_ADI/V\_ADI ; %

Adipose

dConc(13) = Conc(1)\*Q\_BON/V\_BON - Conc(13)\*Q\_BON/Kp\_BON/V\_BON ; %

Bone

dConc(14) = Conc(1)\*Q\_RES/V\_RES - Conc(14)\*Q\_RES/Kp\_RES/V\_RES ; % Rest  
of body

dConc(26) = Conc(1)\*Q\_Airways/V\_LUNb\_Airways - Conc(26)\*Q\_Airways/V\_LUNb\_Airways... % 26 -Lung  
airways blood concentration, C(2)\*fup/B2P = free plasma conc  
+ (LungM\_Airways(14,1)\*Conc(27) + LungM\_Airways(14,2)\*Conc(28) + LungM\_Airways(14,3)\*Conc(29)  
+ LungM\_Airways(14,4)\*Conc(30)...  
+ LungM\_Airways(14,5)\*Conc(31) + LungM\_Airways(14,6)\*Conc(24) + LungM\_Airways(14,7)\*Conc(33)  
+ LungM\_Airways(14,8)\*Conc(34)...  
+ LungM\_Airways(14,9)\*Conc(35) + LungM\_Airways(14,10)\*Conc(36) +  
LungM\_Airways(14,11)\*Conc(37) + LungM\_Airways(14,12)\*Conc(38)...  
+ LungM\_Airways(14,13)\*Conc(39) + LungM\_Airways(14,14)\*Conc(26)\*fup/B2P +  
LungG\_Airways(14)\*V\_LUNp\_Airways/V\_LUNb\_Airways; % 26 -Lung airways blood concentration,  
C(2)\*fup/B2P = free plasma conc

dConc(27) = LungM\_Airways(1,1)\*Conc(27) + LungM\_Airways(1,2)\*Conc(28) +  
LungM\_Airways(1,3)\*Conc(29) + LungM\_Airways(1,4)\*Conc(30) + LungM\_Airways(1,5)\*Conc(31)...  
+ LungM\_Airways(1,6)\*Conc(32) + LungM\_Airways(1,7)\*Conc(33) + LungM\_Airways(1,8)\*Conc(34) +  
LungM\_Airways(1,9)\*Conc(35) + LungM\_Airways(1,10)\*Conc(36)...  
+ LungM\_Airways(1,11)\*Conc(37)+ LungM\_Airways(1,12)\*Conc(38)+  
LungM\_Airways(1,13)\*Conc(39) ...  
+ LungM\_Airways(1,14)\*Conc(26)\*fup/B2P + LungG\_Airways(1); % 27 - Airways  
SurfaConce lining liquid (aEp)

dConc(28) = LungM\_Airways(2,1)\*Conc(27) + LungM\_Airways(2,2)\*Conc(28) +  
LungM\_Airways(2,3)\*Conc(29) + LungM\_Airways(2,4)\*Conc(30) + LungM\_Airways(2,5)\*Conc(31)...  
+ LungM\_Airways(2,6)\*Conc(32) + LungM\_Airways(2,7)\*Conc(33) + LungM\_Airways(2,8)\*Conc(34) +  
LungM\_Airways(2,9)\*Conc(35) + LungM\_Airways(2,10)\*Conc(36)...  
+ LungM\_Airways(2,11)\*Conc(37)+ LungM\_Airways(2,12)\*Conc(38)+  
LungM\_Airways(2,13)\*Conc(39) ...  
+ LungM\_Airways(2,14)\*Conc(26)\*fup/B2P + LungG\_Airways(2); % 28 - Airways  
Macrophage (imEp)

$dConc(29) = LungM\_Airways(3,1)*Conc(27) + LungM\_Airways(3,2)*Conc(28) +$   
 $LungM\_Airways(3,3)*Conc(29) + LungM\_Airways(3,4)*Conc(30) + LungM\_Airways(3,5)*Conc(31)...$   
 $+ LungM\_Airways(3,6)*Conc(32) + LungM\_Airways(3,7)*Conc(33) + LungM\_Airways(3,8)*Conc(34) +$   
 $LungM\_Airways(3,9)*Conc(35) + LungM\_Airways(3,10)*Conc(36)...$   
 $+ LungM\_Airways(3,11)*Conc(37) + LungM\_Airways(3,12)*Conc(38) +$   
 $LungM\_Airways(3,13)*Conc(39) ...$   
 $+ LungM\_Airways(3,14)*Conc(26)*fup/B2P + LungG\_Airways(3);$  % 29 - Airways  
 Epithelial cells (cEp)

$dConc(30) = LungM\_Airways(4,1)*Conc(27) + LungM\_Airways(4,2)*Conc(28) +$   
 $LungM\_Airways(4,3)*Conc(29) + LungM\_Airways(4,4)*Conc(30) + LungM\_Airways(4,5)*Conc(31)...$   
 $+ LungM\_Airways(4,6)*Conc(32) + LungM\_Airways(4,7)*Conc(33) + LungM\_Airways(4,8)*Conc(34) +$   
 $LungM\_Airways(4,9)*Conc(35) + LungM\_Airways(4,10)*Conc(36)...$   
 $+ LungM\_Airways(4,11)*Conc(37) + LungM\_Airways(4,12)*Conc(38) +$   
 $LungM\_Airways(4,13)*Conc(39) ...$   
 $+ LungM\_Airways(4,14)*Conc(26)*fup/B2P + LungG\_Airways(4);$  % 30 - Airways  
 Epithelial cells (cEpMito)

$dConc(31) = LungM\_Airways(5,1)*Conc(27) + LungM\_Airways(5,2)*Conc(28) +$   
 $LungM\_Airways(5,3)*Conc(29) + LungM\_Airways(5,4)*Conc(30) + LungM\_Airways(5,5)*Conc(31)...$   
 $+ LungM\_Airways(5,6)*Conc(32) + LungM\_Airways(5,7)*Conc(33) + LungM\_Airways(5,8)*Conc(34) +$   
 $LungM\_Airways(5,9)*Conc(35) + LungM\_Airways(5,10)*Conc(36)...$   
 $+ LungM\_Airways(5,11)*Conc(37) + LungM\_Airways(5,12)*Conc(38) +$   
 $LungM\_Airways(5,13)*Conc(39) ...$   
 $+ LungM\_Airways(5,14)*Conc(26)*fup/B2P + LungG\_Airways(5);$  % 31 - Airways  
 Epithelial cells (cEpLyso)

$dConc(32) = LungM\_Airways(6,1)*Conc(27) + LungM\_Airways(6,2)*Conc(28) +$   
 $LungM\_Airways(6,3)*Conc(29) + LungM\_Airways(6,4)*Conc(30) + LungM\_Airways(6,5)*Conc(31)...$   
 $+ LungM\_Airways(6,6)*Conc(32) + LungM\_Airways(6,7)*Conc(33) + LungM\_Airways(6,8)*Conc(34) +$   
 $LungM\_Airways(6,9)*Conc(35) + LungM\_Airways(6,10)*Conc(36)...$   
 $+ LungM\_Airways(6,11)*Conc(37) + LungM\_Airways(6,12)*Conc(38) +$   
 $LungM\_Airways(6,13)*Conc(39) ...$   
 $+ LungM\_Airways(6,14)*Conc(26)*fup/B2P + LungG\_Airways(6);$  % 32 - Airways  
 Interstitium (int)

$dConc(33) = LungM\_Airways(7,1)*Conc(27) + LungM\_Airways(7,2)*Conc(28) +$   
 $LungM\_Airways(7,3)*Conc(29) + LungM\_Airways(7,4)*Conc(30) + LungM\_Airways(7,5)*Conc(31)...$   
 $+ LungM\_Airways(7,6)*Conc(32) + LungM\_Airways(7,7)*Conc(33) + LungM\_Airways(7,8)*Conc(34) +$   
 $LungM\_Airways(7,9)*Conc(35) + LungM\_Airways(7,10)*Conc(36)...$   
 $+ LungM\_Airways(7,11)*Conc(37) + LungM\_Airways(7,12)*Conc(38) +$   
 $LungM\_Airways(7,13)*Conc(39) ...$   
 $+ LungM\_Airways(7,14)*Conc(26)*fup/B2P + LungG\_Airways(7);$  % 33 - Airways  
 Smooth muscle (sm)

$dConc(34) = LungM\_Airways(8,1)*Conc(27) + LungM\_Airways(8,2)*Conc(28) +$   
 $LungM\_Airways(8,3)*Conc(29) + LungM\_Airways(8,4)*Conc(30) + LungM\_Airways(8,5)*Conc(31)...$   
 $+ LungM\_Airways(8,6)*Conc(32) + LungM\_Airways(8,7)*Conc(33) + LungM\_Airways(8,8)*Conc(34) +$   
 $LungM\_Airways(8,9)*Conc(35) + LungM\_Airways(8,10)*Conc(36)...$   
 $+ LungM\_Airways(8,11)*Conc(37) + LungM\_Airways(8,12)*Conc(38) +$   
 $LungM\_Airways(8,13)*Conc(39) ...$   
 $+ LungM\_Airways(8,14)*Conc(26)*fup/B2P + LungG\_Airways(8);$  % 34 - Airways  
 Smooth muscle (smMito)

$dConc(35) = LungM\_Airways(9,1)*Conc(27) + LungM\_Airways(9,2)*Conc(28) +$   
 $LungM\_Airways(9,3)*Conc(29) + LungM\_Airways(9,4)*Conc(30) + LungM\_Airways(9,5)*Conc(31)...$   
 $+ LungM\_Airways(9,6)*Conc(32) + LungM\_Airways(9,7)*Conc(33) + LungM\_Airways(9,8)*Conc(34) +$   
 $LungM\_Airways(9,9)*Conc(35) + LungM\_Airways(9,10)*Conc(36)...$   
 $+ LungM\_Airways(9,11)*Conc(37) + LungM\_Airways(9,12)*Conc(38) +$   
 $LungM\_Airways(9,13)*Conc(39) ...$   
 $+ LungM\_Airways(9,14)*Conc(26)*fup/B2P + LungG\_Airways(9);$  % 35 - Airways  
 Smooth muscle (smLyso)

$dConc(36) = LungM\_Airways(10,1)*Conc(27) + LungM\_Airways(10,2)*Conc(28) +$   
 $LungM\_Airways(10,3)*Conc(29) + LungM\_Airways(10,4)*Conc(30) + LungM\_Airways(10,5)*Conc(31)...$   
 $+ LungM\_Airways(10,6)*Conc(32) + LungM\_Airways(10,7)*Conc(33) +$   
 $LungM\_Airways(10,8)*Conc(34) + LungM\_Airways(10,9)*Conc(35) + LungM\_Airways(10,10)*Conc(36)...$   
 $+ LungM\_Airways(10,11)*Conc(37) + LungM\_Airways(10,12)*Conc(38) +$   
 $LungM\_Airways(10,13)*Conc(39) ...$   
 $+ LungM\_Airways(10,14)*Conc(26)*fup/B2P + LungG\_Airways(10);$  % 36 - Airways  
 Immune cells (imInt)

$dConc(37) = LungM\_Airways(11,1)*Conc(27) + LungM\_Airways(11,2)*Conc(28) +$   
 $LungM\_Airways(11,3)*Conc(29) + LungM\_Airways(11,4)*Conc(30) + LungM\_Airways(11,5)*Conc(31)...$   
 $+ LungM\_Airways(11,6)*Conc(32) + LungM\_Airways(11,7)*Conc(33) +$   
 $LungM\_Airways(11,8)*Conc(34) + LungM\_Airways(11,9)*Conc(35) + LungM\_Airways(11,10)*Conc(36)...$   
 $+ LungM\_Airways(11,11)*Conc(37) + LungM\_Airways(11,12)*Conc(38) +$   
 $LungM\_Airways(11,13)*Conc(39) ...$   
 $+ LungM\_Airways(11,14)*Conc(26)*fup/B2P + LungG\_Airways(11);$  % 37 - Airways  
 Endothelial cells

$dConc(38) = LungM\_Airways(12,1)*Conc(27) + LungM\_Airways(12,2)*Conc(28) +$   
 $LungM\_Airways(12,3)*Conc(29) + LungM\_Airways(12,4)*Conc(30) + LungM\_Airways(12,5)*Conc(31)...$   
 $+ LungM\_Airways(12,6)*Conc(32) + LungM\_Airways(12,7)*Conc(33) +$   
 $LungM\_Airways(12,8)*Conc(34) + LungM\_Airways(12,9)*Conc(35) + LungM\_Airways(12,10)*Conc(36)...$   
 $+ LungM\_Airways(12,11)*Conc(37) + LungM\_Airways(12,12)*Conc(38) +$   
 $LungM\_Airways(12,13)*Conc(39) ...$   
 $+ LungM\_Airways(12,14)*Conc(26)*fup/B2P + LungG\_Airways(12);$  % 38 -  
 Endothelial cells (cEdMito)

$dConc(39) = LungM\_Airways(13,1)*Conc(27) + LungM\_Airways(13,2)*Conc(28) +$   
 $LungM\_Airways(13,3)*Conc(29) + LungM\_Airways(13,4)*Conc(30) + LungM\_Airways(13,5)*Conc(31)...$   
 $+ LungM\_Airways(13,6)*Conc(32) + LungM\_Airways(13,7)*Conc(33) +$   
 $LungM\_Airways(13,8)*Conc(34) + LungM\_Airways(13,9)*Conc(35) + LungM\_Airways(13,10)*Conc(36)...$   
 $+ LungM\_Airways(13,11)*Conc(37) + LungM\_Airways(13,12)*Conc(38) +$   
 $LungM\_Airways(13,13)*Conc(39) ...$   
 $+ LungM\_Airways(13,14)*Conc(26)*fup/B2P + LungG\_Airways(13);$  % 39 -  
 Endothelial cells (cEdLyso)

$V_{tot} = diag([V\_ART V\_LUNb V\_VEN V\_HRT V\_BRA V\_LIV V\_GUT V\_SPL V\_KID...$   
 $V\_MUS V\_SKN V\_ADI V\_BON V\_RES diag(M\_v)*10^6 V\_LUNb\_Airways$   
 $diag(M\_v\_Airways)*10^6]);$

$dConc = [dConc(1), dConc(2), dConc(3), dConc(4), dConc(5), dConc(6), dConc(7), dConc(8), dConc(9),$   
 $dConc(10),...$   
 $dConc(11), dConc(12), dConc(13), dConc(14), dConc(15), dConc(16), dConc(17), dConc(18), dConc(19),$   
 $dConc(20),...$

dConc(21), dConc(22), dConc(23), dConc(24), dConc(25), dConc(26), dConc(27), dConc(28), dConc(29),  
dConc(30),...  
dConc(31), dConc(32), dConc(33), dConc(34), dConc(35), dConc(36), dConc(37), dConc(38), dConc(39)]' ;

```

% Whole body physiologically based pharmacokinetic model:
% compartments and corresponding number

% function
function [T,Y,Conc_LUNSim,Con_al,Con_aw,Mass_LUNtemp,Mass_Airwaystemp]= AT_RL_IH_fun()
global BW V_VEN fup B2P Vtot;

% calculate the concentration accumulated in the lung by Jerry's model
[M, G, M_v, Vp] = AT_al_RL();
[M_Airways, G_Airways, M_v_Airways, Vp_Airways] = AT_aw_RL();

%observed tissue concentration
Conc_Lung = [13.05,6.30,1.71,0.96]*10^3;%ng/ml;Schneck 1977 paper
t_obs = [20,60,120,240];

BW = 0.25 ;
V_VEN = 0.0544*BW*1000 ;%ml
Y0 = zeros(39,1) ;

% %inhale dose
% Y0(15) = 0.5*2*10^6*BW/(M_v(1,1)*10^6) ; % AL,ng/mL
% Y0(27) = 0.5*2*10^6*BW/(M_v_Airways(1,1)*10^6) ; % AW,ng/mL
%
% % IV dose
% %Y0(3) = (1*10^6*M_v(1,1)*10^6 + 1*10^6*M_v_Airways(1,1)*10^6)/V_VEN;

%inhale dose same Conc
Y0(15) = 0.5*2*10^6 ; % AL,ng/mL
Y0(27) = 0.5*2*10^6 ; % AW,ng/mL

Yopt = 1e-13 * ones(1,39) ;
options = odeset('RelTol',1e-13,'AbsTol',Yopt);
[T,Y] = ode15s(@AT_Lung_RL,[0 10*60],Y0,options);
len = length(T) ;
Conc_LUNtemp = Y(:,15:25) ;
Mass_LUNtemp = Conc_LUNtemp*(M_v*10^6) ; %ng,alveo

Conc_Airwaystemp = Y(:,27:39) ;
Mass_Airwaystemp = Conc_Airwaystemp*(M_v_Airways*10^6) ; %ng

Mass_LUNSim = sum(Mass_LUNtemp, 2) + sum(Mass_Airwaystemp, 2) ;%ng
Conc_LUNSim = Mass_LUNSim / ((trace(M_v)*10^6)+(trace(M_v_Airways)*10^6)); %ng/mL

Con_al = sum(Mass_LUNtemp, 2)/(trace(M_v)*10^6);%ng/ml
Con_aw = sum(Mass_Airwaystemp, 2)/(trace(M_v_Airways)*10^6);%ng/ml

% lung:venous blood concentration ratio (Kp_LUN)
Kpulung = Conc_LUNSim(len)/(Y(len,3)*fup/B2P) ;
Kplung = Conc_LUNSim(len)/Y(len,3) ;
Conc_LUN_1hr = Conc_LUNSim(len);%ng/ml
Conc_ven_1hr = Y(len,3);%ng/ml

% organelle mass/concentration
Mass = Y*Vtot;%ng
%mito
Mass_mito = Mass(:,18) + Mass(:,24) + Mass(:,30) + Mass(:,34) + Mass(:,38);

```



```

V_mito = Vtot(18,18) + Vtot(24,24) + Vtot(30,30) + Vtot(34,34) + Vtot(38,38);
C_mito = Mass_mito/V_mito;
%lyso
Mass_lyso = Mass(:,19) + Mass(:,25) + Mass(:,31) + Mass(:,35) + Mass(:,39);
V_lyso = Vtot(19,19) + Vtot(25,25) + Vtot(31,31) + Vtot(35,35) + Vtot(39,39);
C_lyso = Mass_lyso/V_lyso;
%cyto
Mass_cyto = Mass(:,16) + Mass(:,17) + Mass(:,21) + Mass(:,22) + Mass(:,23)...
+ Mass(:,28) + Mass(:,29) + Mass(:,33) + Mass(:,36) + Mass(:,37);
V_cyto = Vtot(16,16) + Vtot(17,17) + Vtot(21,21) + Vtot(22,22) + Vtot(23,23)...
+ Vtot(28,28) + Vtot(29,29) + Vtot(33,33) + Vtot(36,36) + Vtot(37,37);
C_cyto = Mass_cyto/V_cyto;

end

```

```

% Main function
clear
close all
clc

% -----
% MTR
%-----
[HIH.T,HIH.Y,HIH.C_lung,HIH.C_al,HIH.C_aw]=AT_RL_IH_fun();
AUC_al = trapz(HIH.T,HIH.C_al);
AUC_aw = trapz(HIH.T,HIH.C_aw);
HIH.L_al = num2str(AUC_al,'%6.2e');
HIH.L_aw = num2str(AUC_aw,'%6.2e');
% HIH.Y = HIH.Y.*10^6;
save('3','HIH');

Fig1 = figure;
sub1 = subplot(1,1,1,'Parent',Fig1,'YScale','log','YMinorTick','on',...
    'FontSize',30);
xlim(sub1,[0 60]);
% Uncomment the following line to preserve the Y-limits of the axes
ylim(sub1,[1 10^8]);
hold(sub1,'all');

for i = [3]
load(num2str(i));
AL = strcat('Inhale');
AW = AL;
plot(HIH.T,HIH.C_al,'DisplayName',strcat('Alveoli Total',';', AL),'LineWidth',3);%Inhale,al
plot(HIH.T,HIH.C_aw,'DisplayName',strcat('Airways Total',';', AW),'LineWidth',3);%Inhale,aw

% Create xlabel
xlabel('Time (min)','FontSize',30);
% Create ylabel
ylabel('Concentration (ng/ml)','FontSize',30);
title('MTR','FontSize',30);
legend1 = legend(sub1,'show');
set(legend1,'FontSize',24,'FontName','Arial');
end

hold off

```
