# Supplementary material for: A Cell-based Computational Modeling Approach for Developing Site-Directed Molecular Probes
Source: PubMed Central journal article supplement (PMC3285574; doi:10.1371/journal.pcbi.1002378), 2012-02-23
Supplement: pcbi.1002378.s007.pdf [file pcbi.1002378.s007.pdf]

**Supplementary Information for**

**A Cell-based Computational Modeling Approach for Developing**

**Site-Directed Molecular Probes**

Jing-yu Yu<sup>1#</sup>, Nan Zheng<sup>1#</sup>, Gerta Mane<sup>2</sup>, Kyoung Ah Min<sup>1</sup>, Juan Hinestroza<sup>3</sup>, Huaning Zhu<sup>3</sup>, Kathleen A. Stringer<sup>2</sup>, and Gus R. Rosania<sup>1\*</sup>

**Table S1.**

**Parameters and Sensitivity Analysis**

**Table. I.** Constant Parameters in the Model

| Symbol | Value      | Unit        | description            |
|--------|------------|-------------|------------------------|
| T      | 310.15     | K           | Body temperature       |
| R      | 8.314      | J / mol / K | Universal gas constant |
| F      | 96485.3415 | sA / mol    | Faraday constant       |

Parameter abbreviations in Supplementary Tables: L indicates the volumetric fraction of lipids (dimensionless), G indicates the activity coefficient  $\gamma$  (dimensionless), A indicates the surface area of the membrane (unit:  $m^2$ ), V indicates the volume of the corresponding compartment (unit:  $m^3$ ). E indicates the membrane potential (unit: V), pH indicates the pH values in corresponding compartment (dimensionless). Ro indicates the volumetric percentage of organelles in cellular compartments (dimensionless). The subscripts *aEp* indicates the apical side of epithelial cells, *cEp* indicates the cytosol of epithelial, *imEp* indicates the macrophage/immune cells on the surface of epithelium, *int* indicates the interstitium, *imInt* indicates the immune cells in the interstitium, *sm*

indicates the smooth muscle, *cEd* indicates the cytosol of endothelium, *p* indicates the plasma.

**Table. S2.** Parameter values and sensitivity analysis of AUC (mg/ml\*min) for alveoli

| Parameter | Default | Low   | High | Mean    | SD       | CV       | Trend |
|-----------|---------|-------|------|---------|----------|----------|-------|
| LaEp      | 0.95    | 0.05  | 0.95 | 0.06148 | 0.01861  | 0.3027   | +     |
| LimEp     | 0.05    | 0.005 | 0.5  | 0.09819 | 0.001462 | 0.01489  | +     |
| LcEp      | 0.05    | 0.005 | 0.5  | 0.09709 | 0.000794 | 0.008183 | +     |
| Lint      | 0       | 0.005 | 0.5  | 0.09702 | 0.00055  | 0.005668 | +     |
| LimInt    | 0.05    | 0.005 | 0.5  | 0.09621 | 5.61E-05 | 0.000583 | +     |
| LcEd      | 0.05    | 0.005 | 0.5  | 0.09863 | 0.001656 | 0.0168   | +     |
| Lp        | 0       | 0.005 | 0.5  | 0.09612 | 6.08E-12 | 6.33E-11 | -     |
| GaEpN     | 1       | 0.5   | 1.5  | 0.09677 | 0.005074 | 0.05243  | -     |
| GaEpD     | 1       | 0.5   | 1.5  | 0.1017  | 0.02376  | 0.2336   | -     |
| GimEpN    | 1.23    | 0.5   | 1.5  | 0.09614 | 1.45E-05 | 0.000151 | -     |
| GimEpD    | 0.74    | 0.5   | 1.5  | 0.09569 | 0.000605 | 0.006326 | -     |
| GcEpN     | 1.23    | 0.5   | 1.5  | 0.09613 | 7.49E-06 | 7.79E-05 | -     |
| GcEpD     | 0.74    | 0.5   | 1.5  | 0.09589 | 0.000346 | 0.003612 | -     |
| GintN     | 1       | 0.5   | 1.5  | 0.09612 | 6.30E-07 | 6.55E-06 | -     |
| GintD     | 1       | 0.5   | 1.5  | 0.09615 | 0.000236 | 0.002452 | -     |
| GimIntN   | 1.23    | 0.5   | 1.5  | 0.09612 | 6.24E-07 | 6.50E-06 | -     |
| GimIntD   | 0.74    | 0.5   | 1.5  | 0.0961  | 2.73E-05 | 0.000284 | -     |
| GcEdN     | 1.23    | 0.5   | 1.5  | 0.09613 | 1.86E-05 | 0.000194 | -     |
| GcEdD     | 0.74    | 0.5   | 1.5  | 0.09553 | 0.000717 | 0.007507 | -     |
| GpN       | 1       | 0.5   | 1.5  | 0.09612 | 6.88E-13 | 7.16E-12 | +     |
| GpD       | 1       | 0.5   | 1.5  | 0.09612 | 1.12E-11 | 1.17E-10 | +     |

|         |          |          |          |         |          |          |   |
|---------|----------|----------|----------|---------|----------|----------|---|
| AaEp    | 0.387    | 0.0387   | 3.87     | 0.06819 | 0.04024  | 0.5901   | - |
| Aabp    | 0.387    | 0.0387   | 3.87     | 0.09149 | 0.01539  | 0.1682   | - |
| AimEp   | 0.0042   | 0.00042  | 0.042    | 0.101   | 0.003111 | 0.0308   | + |
| AimInt  | 0.00042  | 0.000042 | 0.0042   | 0.09612 | 1.32E-09 | 1.37E-08 | + |
| AbEd    | 0.452    | 0.0452   | 4.52     | 0.09261 | 0.008726 | 0.09422  | - |
| AaEd    | 0.452    | 0.0452   | 4.52     | 0.09281 | 0.01073  | 0.1156   | - |
| ASL     | 5        | 0.5      | 50       | 0.1065  | 0.01065  | 0.1001   | + |
| Vint    | 2.68E-07 | 2.68E-08 | 2.68E-06 | 0.07264 | 0.01426  | 0.1963   | - |
| Ro      | 0.1      | 0.01     | 0.5      | 0.09777 | 0.001412 | 0.01444  | + |
| pHaEp   | 7.4      | 4        | 9        | 0.09607 | 0.003608 | 0.03756  | + |
| pHimEp  | 7        | 4        | 9        | 0.09593 | 0.001094 | 0.01141  | - |
| pHcEp   | 7        | 4        | 9        | 0.09889 | 0.005637 | 0.057    | + |
| pHint   | 7        | 4        | 9        | 0.1004  | 0.008185 | 0.08152  | + |
| pHimInt | 7        | 4        | 9        | 0.09612 | 4.42E-05 | 0.00046  | - |
| pHcEd   | 7        | 4        | 9        | 0.09596 | 0.002246 | 0.02341  | - |
| pHp     | 7.4      | 4        | 9        | 0.09612 | 1.28E-11 | 1.33E-10 | - |
| EbEd    | -0.06    | -0.12    | 0        | 0.09933 | 0.01645  | 0.1656   | + |
| EaEd    | -0.06    | -0.12    | 0        | 0.09759 | 0.009574 | 0.0981   | - |
| EimInt  | -0.06    | -0.12    | 0        | 0.09616 | 0.000112 | 0.001164 | - |
| EimEp   | -0.06    | -0.12    | 0        | 0.09388 | 8.63E-05 | 0.000919 | + |
| EbEp    | 0.0119   | 0        | 0.12     | 0.07161 | 0.01334  | 0.1863   | - |
| EaEp    | -0.0093  | -0.12    | 0        | 0.04605 | 0.02446  | 0.1311   | + |

**Table. S3** Parameter values and sensitivity analysis of AUC (mg/ml\*min) for airways

| Parameter | Default | Low   | High | Mean  | SD       | CV       | Trend |
|-----------|---------|-------|------|-------|----------|----------|-------|
| LaEp      | 0.2     | 0.05  | 0.95 | 8.555 | 0.8889   | 0.1039   | +     |
| LcEp      | 0.05    | 0.005 | 0.5  | 7.83  | 0.3157   | 0.04032  | +     |
| Lint      | 0       | 0.005 | 0.5  | 7.509 | 0.03813  | 0.005078 | +     |
| LimInt    | 0.05    | 0.005 | 0.5  | 7.452 | 0.003692 | 0.000495 | +     |
| Lsm       | 0.05    | 0.005 | 0.5  | 9.912 | 1.706    | 0.1721   | +     |
| LcEd      | 0.05    | 0.005 | 0.5  | 7.47  | 0.01523  | 0.002039 | +     |
| Lp        | 0       | 0.005 | 0.5  | 7.447 | 1.18E-08 | 1.58E-09 | -     |
| GaEpN     | 1       | 0.5   | 1.5  | 7.453 | 0.05194  | 0.006969 | -     |
| GaEpD     | 1       | 0.5   | 1.5  | 7.54  | 0.3954   | 0.05243  | -     |
| GcEpN     | 1.23    | 0.5   | 1.5  | 7.449 | 0.002974 | 0.000399 | -     |
| GcEpD     | 0.74    | 0.5   | 1.5  | 7.357 | 0.1376   | 0.01871  | -     |
| GintN     | 1       | 0.5   | 1.5  | 7.447 | 4.36E-05 | 5.85E-06 | -     |
| GintD     | 1       | 0.5   | 1.5  | 7.449 | 0.01635  | 0.002195 | -     |
| GimIntN   | 1.23    | 0.5   | 1.5  | 7.447 | 4.11E-05 | 5.52E-06 | -     |
| GimIntD   | 0.74    | 0.5   | 1.5  | 7.446 | 0.001797 | 0.000241 | -     |
| GsmN      | 1.23    | 0.5   | 1.5  | 7.461 | 0.01669  | 0.002237 | -     |
| GsmD      | 0.74    | 0.5   | 1.5  | 6.921 | 0.7033   | 0.1016   | -     |
| GcEdN     | 1.23    | 0.5   | 1.5  | 7.447 | 0.000171 | 2.30E-05 | -     |
| GcEdD     | 0.74    | 0.5   | 1.5  | 7.441 | 0.006594 | 0.000886 | -     |
| GpN       | 1       | 0.5   | 1.5  | 7.447 | 8.91E-09 | 1.20E-09 | -     |

|         |          |          |          |       |          |          |   |
|---------|----------|----------|----------|-------|----------|----------|---|
| GpD     | 1        | 0.5      | 1.5      | 7.447 | 1.99E-08 | 2.67E-09 | - |
| AaEp    | 1.08E-02 | 2.70E-03 | 4.32E-02 | 7.291 | 3.757    | 0.5153   | - |
| AimInt  | 1.08E+04 | 1.08E-05 | 1.08E-03 | 7.447 | 8.62E-08 | 1.16E-08 | + |
| Asm     | 2.16E-02 | 2.16E-03 | 2.16E-01 | 15.18 | 4.173    | 0.2749   | + |
| AbEd    | 2.16E-03 | 5.40E-04 | 8.64E-03 | 7.152 | 1.164    | 0.1627   | - |
| AaEd    | 2.16E-03 | 5.40E-04 | 8.64E-03 | 7.116 | 1.149    | 0.1614   | - |
| ASL     | 15       | 1.5      | 150      | 4.889 | 1.849    | 0.3781   | - |
| VcEp    | 7.20E-08 | 7.20E-09 | 7.20E-07 | 5.656 | 1.082    | 0.1912   | - |
| Vint    | 1.08E-08 | 1.08E-09 | 1.08E-07 | 6.774 | 0.4348   | 0.06419  | - |
| Vsm     | 4.70E-08 | 4.70E-09 | 4.70E-07 | 15.56 | 4.529    | 0.2911   | + |
| pHaEp   | 7.4      | 4        | 9        | 7.448 | 0.1056   | 0.01418  | - |
| pHcEp   | 7.0      | 4        | 9        | 7.409 | 0.07615  | 0.01028  | - |
| pHint   | 7.0      | 4        | 9        | 7.805 | 0.6839   | 0.08762  | + |
| pHsm    | 7.0      | 4        | 9        | 7.309 | 2.272    | 0.3109   | - |
| pHimInt | 7.0      | 4        | 9        | 7.446 | 0.002912 | 0.000391 | - |
| pHcEd   | 7.0      | 4        | 9        | 7.445 | 0.02066  | 0.002775 | - |
| pHp     | 7.4      | 4        | 9        | 7.447 | 3.19E-08 | 4.28E-09 | - |
| EbEd    | -0.06    | -0.12    | 0        | 8.59  | 0.5854   | 0.06815  | + |
| EaEd    | -0.06    | -0.12    | 0        | 7.79  | 0.2234   | 0.02868  | - |
| Esm     | -0.06    | -0.12    | 0        | 10.46 | 6.49     | 0.6205   | - |
| EimInt  | -0.06    | -0.12    | 0        | 7.449 | 0.007372 | 0.00099  | - |
| EbEp    | 0.0119   | 0        | 0.12     | 6.296 | 0.6186   | 0.09824  | - |
| EaEp    | -0.0093  | -0.12    | 0        | 6.958 | 0.3514   | 0.05051  | + |
| Ro      | 0.1      | 0.01     | 0.5      | 10.44 | 2.555    | 0.2448   | + |

**Table. S4** Parameter values and sensitivity analysis of  $T_{ss}$  (min) for alveoli

| Parameter | Default | low   | high | Mean  | SD       | CV       | Trend |
|-----------|---------|-------|------|-------|----------|----------|-------|
| LaEp      | 0.95    | 0.05  | 0.95 | 1.795 | 0.6543   | 0.3645   | +     |
| LimEp     | 0.05    | 0.05  | 0.5  | 3.297 | 0.1911   | 0.05796  | +     |
| LcEp      | 0.05    | 0.005 | 0.5  | 3.021 | 0.01608  | 0.005323 | +     |
| Lint      | 0       | 0.005 | 0.5  | 2.992 | 0.006055 | 0.002024 | -     |
| LimInt    | 0.05    | 0.005 | 0.5  | 3.016 | 0.01673  | 0.005546 | +     |
| LcEd      | 0.05    | 0.005 | 0.5  | 2.912 | 0.05801  | 0.01992  | -     |
| Lp        | 0       | 0.005 | 0.5  | 2.998 | 0.004398 | 0.001467 | -     |
| GaEpN     | 1       | 0.5   | 1.5  | 3.038 | 0.1957   | 0.06441  | -     |
| GaEpD     | 1       | 0.5   | 1.5  | 3.335 | 0.8703   | 0.261    | -     |
| GimEpN    | 1.23    | 0.5   | 1.5  | 3.002 | 0.002848 | 0.000949 | -     |
| GimEpD    | 0.74    | 0.5   | 1.5  | 2.97  | 0.05358  | 0.01804  | -     |
| GcEpN     | 1.23    | 0.5   | 1.5  | 3.001 | 0.001427 | 0.000476 | +     |
| GcEpD     | 0.74    | 0.5   | 1.5  | 2.994 | 0.007105 | 0.002373 | -     |
| GintN     | 1       | 0.5   | 1.5  | 3.001 | 0.001191 | 0.000397 | +     |
| GintD     | 1       | 0.5   | 1.5  | 2.997 | 0.004986 | 0.001664 | +     |
| GimIntN   | 1.23    | 0.5   | 1.5  | 2.999 | 0.002187 | 0.000729 | +     |
| GimIntD   | 0.74    | 0.5   | 1.5  | 2.998 | 0.004614 | 0.001539 | -     |
| GcEdN     | 1.23    | 0.5   | 1.5  | 2.998 | 0.004602 | 0.001535 | +     |



|         |          |          |          |       |          |          |   |
|---------|----------|----------|----------|-------|----------|----------|---|
| GcEdD   | 0.74     | 0.5      | 1.5      | 3.024 | 0.03149  | 0.01041  | + |
| GpN     | 1        | 0.5      | 1.5      | 3.001 | 0.00178  | 0.000593 | - |
| GpD     | 1        | 0.5      | 1.5      | 2.998 | 0.004921 | 0.001641 | - |
| AaEp    | 0.387    | 0.0387   | 3.87     | 3.259 | 0.725    | 0.2225   | + |
| AbEp    | 0.387    | 0.0387   | 3.87     | 2.924 | 0.3595   | 0.1229   | - |
| AimEp   | 0.0042   | 0.00042  | 0.042    | 2.956 | 0.03784  | 0.0128   | - |
| AimInt  | 0.00042  | 4.19E-05 | 0.004192 | 2.997 | 0.009786 | 0.003266 | - |
| AbEd    | 0.452    | 0.0452   | 4.52     | 2.7   | 0.2743   | 0.1016   | - |
| AaEd    | 0.452    | 0.0452   | 4.52     | 2.774 | 0.3023   | 0.109    | - |
| ASL     | 5        | 0.5      | 50       | 15.3  | 9.311    | 0.6087   | + |
| Vint    | 2.68E-07 | 2.68E-08 | 2.68E-06 | 2.983 | 0.009908 | 0.003322 | - |
| EaEp    | -0.0093  | -0.12    | 0        | 1.162 | 0.08901  | 0.07661  | + |
| EbEp    | 0.0119   | 0        | 0.12     | 1.651 | 0.0762   | 0.04614  | - |
| EimEp   | -0.06    | -0.12    | 0        | 3.147 | 0.293    | 0.09308  | - |
| EimInt  | -0.06    | -0.12    | 0        | 3.007 | 0.01809  | 0.006017 | - |
| EbEd    | -0.06    | -0.12    | 0        | 3.338 | 1.073    | 0.3214   | + |
| EaEd    | -0.06    | -0.12    | 0        | 3.119 | 0.3052   | 0.09785  | - |
| pHaEp   | 7.4      | 4        | 9        | 2.998 | 0.09591  | 0.03199  | + |
| pHimEp  | 7        | 4        | 9        | 2.977 | 0.08239  | 0.02767  | - |
| pHcEp   | 7        | 4        | 9        | 3.138 | 0.2374   | 0.07565  | + |
| pHint   | 7        | 4        | 9        | 3.226 | 0.3662   | 0.1135   | + |
| pHimInt | 7        | 4        | 9        | 2.998 | 0.004545 | 0.001516 | - |
| pHcEd   | 7        | 4        | 9        | 3.063 | 0.1185   | 0.03868  | + |
| pHp     | 7.4      | 4        | 9        | 2.997 | 0.005152 | 0.001719 | - |
| Ro      | 0.1      | 0.01     | 0.5      | 2.921 | 0.06519  | 0.02232  | - |

**Table. S5** Parameter values and sensitivity analysis of  $T_{ss}$  (min) for airways

| Parameter | default | low   | high | Mean  | SD      | CV       | Trend |
|-----------|---------|-------|------|-------|---------|----------|-------|
| LaEp      | 0.2     | 0.05  | 0.95 | 34.37 | 3.208   | 0.09334  | +     |
| LcEp      | 0.05    | 0.005 | 0.5  | 32.61 | 1.097   | 0.03365  | +     |
| Lint      | 0       | 0.005 | 0.5  | 31.26 | 0.1733  | 0.005542 | +     |
| LimInt    | 0.05    | 0.005 | 0.5  | 30.99 | 0.05303 | 0.001711 | -     |
| Lsm       | 0.05    | 0.005 | 0.5  | 41.89 | 7.162   | 0.171    | +     |
| LcEd      | 0.05    | 0.005 | 0.5  | 31    | 0.05826 | 0.001879 | -     |
| Lp        | 0       | 0.005 | 0.5  | 30.96 | 0.0523  | 0.001689 | +     |
| GaEpN     | 1       | 0.5   | 1.5  | 31    | 0.1873  | 0.006043 | -     |
| GaEpD     | 1       | 0.5   | 1.5  | 31.48 | 1.314   | 0.04172  | -     |
| GcEpN     | 1.23    | 0.5   | 1.5  | 30.93 | 0.03826 | 0.001237 | +     |
| GcEpD     | 0.74    | 0.5   | 1.5  | 30.65 | 0.4926  | 0.01607  | -     |
| GintN     | 1       | 0.5   | 1.5  | 30.93 | 0.02438 | 0.000788 | -     |
| GintD     | 1       | 0.5   | 1.5  | 30.99 | 0.09294 | 0.002999 | -     |
| GimIntN   | 1.23    | 0.5   | 1.5  | 30.92 | 0.03475 | 0.001124 | +     |
| GimIntD   | 0.74    | 0.5   | 1.5  | 30.97 | 0.04729 | 0.001527 | -     |

|         |          |          |          |       |         |          |   |
|---------|----------|----------|----------|-------|---------|----------|---|
| GsmN    | 1.23     | 0.5      | 1.5      | 31.03 | 0.1006  | 0.003242 | - |
| GsmD    | 0.74     | 0.5      | 1.5      | 28.41 | 3.055   | 0.1075   | - |
| GcEdN   | 1.23     | 0.5      | 1.5      | 30.95 | 0.04532 | 0.001465 | - |
| GcEdD   | 0.74     | 0.5      | 1.5      | 30.95 | 0.04737 | 0.00153  | + |
| GpN     | 1        | 0.5      | 1.5      | 30.93 | 0.02644 | 0.000855 | + |
| GpD     | 1        | 0.5      | 1.5      | 30.97 | 0.05493 | 0.001774 | - |
| AaEp    | 1.08E-02 | 2.70E-03 | 4.32E-02 | 31.08 | 10.23   | 0.3292   | - |
| AimInt  | 1.08E+04 | 1.08E-05 | 1.08E-03 | 30.96 | 0.04623 | 0.001493 | - |
| Asm     | 2.16E-02 | 2.16E-03 | 2.16E-01 | 124.4 | 66.76   | 0.5367   | - |
| AbEd    | 2.16E-03 | 5.40E-04 | 8.64E-03 | 22.11 | 9.556   | 0.4322   | - |
| AaEd    | 2.16E-03 | 5.40E-04 | 8.64E-03 | 22.8  | 10.32   | 0.4529   | - |
| ASL     | 15       | 1.5      | 150      | 50.52 | 15.21   | 0.301    | + |
| VcEp    | 7.20E-08 | 7.20E-09 | 7.20E-07 | 45.77 | 10.24   | 0.2237   | + |
| Vint    | 1.08E-08 | 1.08E-09 | 1.08E-07 | 32.05 | 0.7181  | 0.02241  | + |
| Vsm     | 4.70E-08 | 4.70E-09 | 4.70E-07 | 124.4 | 66.76   | 0.5367   | + |
| EaEp    | -0.0093  | -0.12    | 0        | 28.33 | 1.249   | 0.04409  | + |
| EbEp    | 0.0119   | 0        | 0.12     | 26.38 | 2.277   | 0.08634  | - |
| Esm     | -0.06    | -0.12    | 0        | 40.18 | 26.64   | 0.6632   | - |
| EimInt  | -0.06    | -0.12    | 0        | 30.99 | 0.06302 | 0.002034 | - |
| EbEd    | -0.06    | -0.12    | 0        | 47.79 | 3.545   | 0.07418  | + |
| EaEd    | -0.06    | -0.12    | 0        | 34.99 | 1.05    | 0.03001  | - |
| pHaEp   | 7.4      | 4        | 9        | 30.98 | 0.2709  | 0.008745 | - |
| pHcEp   | 7        | 4        | 9        | 30.79 | 0.2611  | 0.008477 | - |
| pHint   | 7        | 4        | 9        | 32.87 | 3.068   | 0.09333  | + |
| pHimInt | 7        | 4        | 9        | 30.95 | 0.05372 | 0.001736 | + |

|       |     |      |     |       |         |          |   |
|-------|-----|------|-----|-------|---------|----------|---|
| pHcEd | 7   | 4    | 9   | 30.94 | 0.05553 | 0.001795 | - |
| pHp   | 7.4 | 4    | 9   | 30.97 | 0.06052 | 0.001954 | + |
| Ro    | 0.1 | 0.01 | 0.5 | 51.29 | 17.51   | 0.3415   | + |

**Table. S6** Parameter values and sensitivity analysis of mass deposition for alveoli (mass fraction in lungs)

| Parameter | Default | low   | high | Mean   | SD       | CV       | Trend |
|-----------|---------|-------|------|--------|----------|----------|-------|
| LaEp      | 0.95    | 0.05  | 0.95 | 0.8867 | 0.02451  | 0.02764  | +     |
| LimEp     | 0.05    | 0.005 | 0.5  | 0.9215 | 0.000416 | 0.000452 | +     |
| LcEp      | 0.05    | 0.005 | 0.5  | 0.9215 | 0.000432 | 0.000469 | +     |
| Lint      | 0       | 0.005 | 0.5  | 0.9222 | 0.001027 | 0.001114 | +     |
| LimInt    | 0.05    | 0.005 | 0.5  | 0.921  | 9.63E-05 | 0.000105 | +     |
| LcEd      | 0.05    | 0.005 | 0.5  | 0.9276 | 0.004776 | 0.005148 | +     |

|         |        |         |       |        |          |          |   |
|---------|--------|---------|-------|--------|----------|----------|---|
| Lp      | 0      | 0.005   | 0.5   | 0.8295 | 0.05402  | 0.06512  | - |
| GaEpN   | 1      | 0.5     | 1.5   | 0.9153 | 0.003549 | 0.003877 | - |
| GaEpD   | 1      | 0.5     | 1.5   | 0.9181 | 0.01396  | 0.01521  | - |
| GimEpN  | 1.23   | 0.5     | 1.5   | 0.9147 | 4.31E-06 | 4.71E-06 | - |
| GimEpD  | 0.74   | 0.5     | 1.5   | 0.9146 | 0.000202 | 0.00022  | - |
| GcEpN   | 1.23   | 0.5     | 1.5   | 0.9147 | 4.96E-06 | 5.43E-06 | - |
| GcEpD   | 0.74   | 0.5     | 1.5   | 0.9146 | 0.000211 | 0.000231 | - |
| GintN   | 1      | 0.5     | 1.5   | 0.9147 | 1.22E-05 | 1.34E-05 | - |
| GintD   | 1      | 0.5     | 1.5   | 0.9149 | 0.000565 | 0.000618 | - |
| GimIntN | 1.23   | 0.5     | 1.5   | 0.9147 | 9.48E-07 | 1.04E-06 | - |
| GimIntD | 0.74   | 0.5     | 1.5   | 0.9147 | 3.95E-05 | 4.32E-05 | - |
| GcEdN   | 1.23   | 0.5     | 1.5   | 0.9148 | 6.31E-05 | 6.89E-05 | - |
| GcEdD   | 0.74   | 0.5     | 1.5   | 0.9133 | 0.002762 | 0.003024 | - |
| GpN     | 1      | 0.5     | 1.5   | 0.9147 | 1.79E-09 | 1.95E-09 | + |
| GpD     | 1      | 0.5     | 1.5   | 0.9097 | 0.02491  | 0.02738  | + |
| AaEp    | 0.387  | 0.0387  | 3.87  | 0.9279 | 0.02019  | 0.02176  | + |
| AbEp    | 0.387  | 0.0387  | 3.87  | 0.9208 | 2.48E-15 | 2.70E-15 | - |
| AimEp   | 0.0042 | 0.00042 | 0.042 | 0.9242 | 0.002247 | 0.002431 | + |

|         |          |          |          |        |          |          |   |
|---------|----------|----------|----------|--------|----------|----------|---|
| AimInt  | 0.00042  | 4.19E-05 | 0.004192 | 0.9208 | 2.61E-15 | 2.83E-15 | - |
| AbEd    | 0.452    | 0.0452   | 4.52     | 0.9511 | 0.01806  | 0.01899  | + |
| AaEd    | 0.452    | 0.0452   | 4.52     | 0.9208 | 2.30E-15 | 2.50E-15 | + |
| ASL     | 5        | 0.5      | 50       | 0.9693 | 0.02505  | 0.02584  | + |
| Vint    | 2.68E-07 | 2.68E-08 | 2.68E-06 | 0.9266 | 0.004073 | 0.004395 | + |
| EaEp    | -0.0093  | -0.12    | 0        | 0.7143 | 0.1568   | 0.2196   | + |
| EbEp    | 0.0119   | 0        | 0.12     | 0.8432 | 0.05729  | 0.06795  | - |
| EimEp   | -0.06    | -0.12    | 0        | 0.921  | 0.00079  | 0.000858 | - |
| EimInt  | -0.06    | -0.12    | 0        | 0.9209 | 0.000192 | 0.000209 | - |
| EbEd    | -0.06    | -0.12    | 0        | 0.9152 | 0.05026  | 0.05491  | + |
| EaEd    | -0.06    | -0.12    | 0        | 0.8826 | 0.09135  | 0.1035   | - |
| pHaEp   | 7.4      | 4        | 9        | 0.9213 | 0.002439 | 0.002647 | + |
| pHimEp  | 7        | 4        | 9        | 0.9207 | 0.000335 | 0.000364 | - |
| pHcEp   | 7        | 4        | 9        | 0.9246 | 0.006427 | 0.006951 | + |
| pHint   | 7        | 4        | 9        | 0.9279 | 0.01363  | 0.01469  | + |
| pHimInt | 7        | 4        | 9        | 0.9208 | 6.61E-05 | 7.18E-05 | - |
| pHcEd   | 7        | 4        | 9        | 0.9169 | 0.008666 | 0.009452 | - |
| pHp     | 7.4      | 4        | 9        | 0.9284 | 0.01869  | 0.02013  | + |

|    |     |      |     |        |          |          |   |
|----|-----|------|-----|--------|----------|----------|---|
| Ro | 0.1 | 0.01 | 0.5 | 0.9302 | 0.008617 | 0.009263 | + |
|----|-----|------|-----|--------|----------|----------|---|

**Table. S7** Parameter and sensitivity analysis of mass deposition for airways (mass fraction in lungs)

| Parameter | Default | low   | high | Mean    | SD       | CV       | Trend |
|-----------|---------|-------|------|---------|----------|----------|-------|
| LaEp      | 0.2     | 0.05  | 0.95 | 0.08661 | 0.006106 | 0.0705   | +     |
| LcEp      | 0.05    | 0.005 | 0.5  | 0.08279 | 0.002397 | 0.02896  | +     |
| Lint      | 0       | 0.005 | 0.5  | 0.07976 | 0.000444 | 0.00556  | +     |
| Lsm       | 0.05    | 0.005 | 0.5  | 0.1035  | 0.01537  | 0.1485   | +     |
| LimInt    | 0.05    | 0.005 | 0.5  | 0.07923 | 3.87E-05 | 0.000489 | +     |
| LcEd      | 0.05    | 0.005 | 0.5  | 0.07966 | 0.000349 | 0.004382 | +     |
| Lp        | 0       | 0.005 | 0.5  | 0.03946 | 0.001595 | 0.04042  | -     |
| GaEpN     | 1       | 0.5   | 1.5  | 0.07924 | 0.000363 | 0.004582 | -     |
| GaEpD     | 1       | 0.5   | 1.5  | 0.08016 | 0.002608 | 0.03254  | -     |

|         |          |          |          |         |          |          |   |
|---------|----------|----------|----------|---------|----------|----------|---|
| GcEpN   | 1.23     | 0.5      | 1.5      | 0.07919 | 2.40E-05 | 0.000303 | - |
| GcEpD   | 0.74     | 0.5      | 1.5      | 0.07833 | 0.001    | 0.01277  | - |
| GintN   | 1        | 0.5      | 1.5      | 0.07917 | 6.29E-06 | 7.94E-05 | - |
| GintD   | 1        | 0.5      | 1.5      | 0.07929 | 0.00027  | 0.003408 | - |
| GsmN    | 1.23     | 0.5      | 1.5      | 0.07936 | 0.000182 | 0.002295 | - |
| GsmD    | 0.74     | 0.5      | 1.5      | 0.07293 | 0.007359 | 0.1009   | - |
| GimIntN | 1.23     | 0.5      | 1.5      | 0.07917 | 4.28E-07 | 5.40E-06 | - |
| GimIntD | 0.74     | 0.5      | 1.5      | 0.07916 | 1.75E-05 | 0.000221 | - |
| GcEdN   | 1.23     | 0.5      | 1.5      | 0.07917 | 3.46E-06 | 4.36E-05 | - |
| GcEdD   | 0.74     | 0.5      | 1.5      | 0.07904 | 0.00013  | 0.00165  | - |
| GpN     | 1        | 0.5      | 1.5      | 0.07913 | 0.000155 | 0.001964 | + |
| GpD     | 1        | 0.5      | 1.5      | 0.07391 | 0.002036 | 0.02755  | + |
| AaEp    | 1.08E-02 | 2.70E-03 | 4.32E-02 | 0.08063 | 0.00408  | 0.0506   | + |
| AimInt  | 1.08E+04 | 1.08E-05 | 1.08E-03 | 0.07945 | 0.000201 | 0.002525 | + |
| Asm     | 2.16E-02 | 2.16E-03 | 2.16E-01 | 0.2206  | 0.1051   | 0.4766   | + |
| AbEd    | 2.16E-03 | 5.40E-04 | 8.64E-03 | 0.07947 | 0.000445 | 0.005597 | + |
| AaEd    | 2.16E-03 | 5.40E-04 | 8.64E-03 | 0.0833  | 0.002652 | 0.03184  | + |
| Vint    | 1.08E-08 | 1.08E-09 | 1.08E-07 | 0.08255 | 0.00229  | 0.02774  | + |
| EaEp    | -0.0093  | -0.12    | 0        | 0.07357 | 0.002812 | 0.03823  | + |
| EbEp    | 0.0119   | 0        | 0.12     | 0.0688  | 0.005865 | 0.08524  | - |
| Esm     | -0.06    | -0.12    | 0        | 0.09275 | 0.06086  | 0.6562   | - |
| EimInt  | -0.06    | -0.12    | 0        | 0.0792  | 8.91E-05 | 0.001125 | - |
| EbEd    | -0.06    | -0.12    | 0        | 0.1321  | 0.01128  | 0.08541  | + |
| EaEd    | -0.06    | -0.12    | 0        | 0.0943  | 0.007571 | 0.08028  | - |
| pHaEp   | 7.4      | 4        | 9        | 0.07907 | 0.00068  | 0.008595 | - |



|         |     |      |     |         |          |          |   |
|---------|-----|------|-----|---------|----------|----------|---|
| pHcEp   | 7   | 4    | 9   | 0.07879 | 0.000626 | 0.007948 | - |
| pHint   | 7   | 4    | 9   | 0.08395 | 0.007481 | 0.08911  | + |
| pHsm    | 7   | 4    | 9   | 0.07023 | 0.02485  | 0.3538   | - |
| pHimInt | 7   | 4    | 9   | 0.07916 | 3.29E-05 | 0.000416 | - |
| pHcEd   | 7   | 4    | 9   | 0.07901 | 0.000458 | 0.005797 | - |
| pHp     | 7.4 | 4    | 9   | 0.09632 | 0.003901 | 0.0405   | + |
| Ro      | 0.1 | 0.01 | 0.5 | 0.119   | 0.03917  | 0.3292   | + |
