# Supplementary material for: A Cell-based Computational Modeling Approach for Developing Site-Directed Molecular Probes
Source: PLoS Comput Biol. 2012 Feb 23;8(2):e1002378. doi: 10.1371/journal.pcbi.1002378 (PMC3285574; doi:10.1371/journal.pcbi.1002378)
Supplement: Text S2 — File AW_AL_Mass.pdf containing detailed instructions and Matlab code used to generate figure 2D–F . (PDF) [file pcbi.1002378.s002.pdf]

**Instruction**  
**m code for Figure 2 - D, E and F**

There are five m files in this PDF file. Their locations were listed in the table below. Put all five m files as noted below into same folder, and run Main.m file to run the simulation.

| <b>m file name</b>   | <b>Pages (starting – end page)</b> |
|----------------------|------------------------------------|
| Lung_AW.m            | 2-12                               |
| Lung_AL.m            | 13-22                              |
| Local_lung_PBPk.m    | 23-28                              |
| Local_lung_Kpu_fun.m | 29-30                              |
| Main.m               | 31-31                              |

```

% 4/30/2010
% 1CellPK based lung model starts here (Rats)
% 12 compartments:
% aEp (surface lining liquied), imEp (Macrophage),
% cEp(epithelial cells),cEpMito(mito of cEp), cEpLyso (lyso of cEp)
% int(Interstitial),imInt(immune cells), sm(smooth muscle),
% cEd(endothelial cells), cEdMito(mito of cEd),cEdLyso (lyso of cEd), p(plasma)

function [M, G, M_v, Vp] = Lung_AW(pKa,logPN,n)

% Constant
T = 273.15+37;
R = 8.314;
F = 96484.56;
%lipid fraction
LaEp = 0.2;
LimEp = 0.05;
LcEp = 0.05 ;
Lint = 0.05;
Lsm = 0.05;
LimInt = 0.05;
LcEd = 0.05;
Lp = 0;
%volumetric water fraction=1-lipid fraction
WaEp = 1 - LaEp;
WimEp = 1 - LimEp;
WcEp = 1 - LcEp;
Wint = 1 - Lint;
Wsm = 1 - Lsm;
WimInt = 1 - LimInt;
WcEd = 1 - LcEd;
Wp = 1 - Lp;
%activity coefficient of species(N:neutral,D:desociated)
GaEpN = 1;
GaEpD = 1;
GimEpN = 1.23;
GimEpD = 0.74;
GcEpN = 1.23;
GcEpD = 0.74;
GintN = 1;
GintD = 1;
GsmN = 1.23;
GsmD = 0.74;
GimIntN = 1.23;
GimIntD = 0.74;
GcEdN = 1.23;
GcEdD = 0.74;
GpN = 1;
GpD = 1;

% By Jingyu Yu (used in publication, J YU, Pharm Res 2010) parameters in airways
% Areas and volumes (m^2, m^3) for 7 membranes and corresponding compartments
AaEp = 108*10^(-4);%
AbEp = AaEp;%assuming same with apical
AimEp = 0;%No macrophage
AimInt = 0.01*AaEp;%estimate

```

```

Asm = AaEp*2; % two side, double the surface area of airway,T model
AbEd = AaEp/5;%estimated 1/5 surface of epithelium
AaEd = AbEd;% same as basical side
%volumes for 8 compartments(m3)
ASL = 15; %um literature
VaEp = AaEp*ASL*10^(-6); % 15 um thickness
VimEp = 10^(-30); % 10^(-12)*VaEp; % Anynumber,No macrophage at surface
VcEp = 0.072*10^(-6); % estimated from yori model,basement membrane->surface area->thickness of each
generation
Vint = AaEp*1*10^(-6);%estimated
Vsm = 0.047*10^(-6);%% estimated from yori model,basement membrane->surface area->thickness of each
generation
VimInt = 0.01*Vint;%setimated
VcEd = AbEd*0.4*10^(-6); %estimated from literature,thickness of endothelium in AW
Vp = 5; %total blood

% calculate constant
VcEpMito = 0.1*VcEp;
VcEpLyso = 0.1*VcEp;
VcEdMito = 0.1*VcEd ;
VcEdLyso = 0.1*VcEd ;
VsmMito = 0.1*Vsm;
VsmLyso = 0.1*Vsm;

AcEpMito = 5.9924e+006*VcEpMito ;
AcEpLyso = 5.9924e+006*VcEpLyso ;
AcEdMito = 5.9924e+006*VcEdMito ;
AcEdLyso = 5.9924e+006*VcEdLyso ;
AsmMito = 5.9924e+006*VsmMito ;
AsmLyso = 5.9924e+006*VsmLyso ;
%#####

M_v = diag([VaEp,VimEp,VcEp,VcEpMito,VcEpLyso,Vint,Vsm, VsmMito, VsmLyso, VimInt, VcEd, VcEdMito,
VcEdLyso]);
V_LUN = trace(M_v)*10^6;

% Membrane potential (V)
EaEp = -0.0093;
EbEp = 0.0019;%0.0119;
EimEp = -0.06;
Esm = -0.06;
EimInt = -0.06;
EbEd = -0.06;
EaEd = -0.06;
% pH values
pHaEp = 7.4;
pHimEp = 7.0;
pHcEp = 7.0;
pHint = 7.0;
pHsm = 7.0;
pHimInt = 7.0;
pHcEd = 7.0;
pHp = 7.4;

% molecular physiochemical property

```

```

logPD = logPN-3.7 ;
z = 1;

%adjustment for logP
if ( abs(z-1) <= 10^(-6) )
    logP_nlipT = 0.33*logPN+2.2 ;
    logP_dlipT = 0.37*logPD+2 ;
end
if ( abs(z+1) <= 10^(-6) )
    logP_nlipT = 0.37*logPN+2.2 ;
    logP_dlipT = 0.33*logPD+2.6 ;
end
if ( abs(z-0) <= 10^(-5) )
    logP_nlipT = 0.33*logPN+2.2 ;
    logP_dlipT = 0.33*logPD+2.2 ;
end

% Get the first two decimals
logP_n = round(logP_nlipT*100)/100 ;
logP_d = round(logP_dlipT*100)/100 ;
%calculate the membrane permeability
Pn = 10^(logP_n-6.7)*60; % in 1/min
Pd = 10^(logP_d-6.7)*60; % in 1/min

i = -sign(z) ;
%calculate N for flux of ion happening at 7 membranes
C = z*F/(R*T);
NaEp = C*(-EaEp) ;
NbEp = C*EbEp ;
NimEp = C*EimEp ;
Nsm = C*Esm ;
NimInt = C*EimInt ;
NbEd = C*(-EbEd) ;
NaEd = C*EaEd ;
%calculate Kn and Kd for 8 compartments
N = 1.22*10^(logP_n);
D = 1.22*10^(logP_d);
KaEpN = N*LaEp ;
KaEpD = D*LaEp ;
KimEpN = N*LimEp ;
KimEpD = D*LimEp ;
KcEpN = N*LcEp ;
KcEpD = D*LcEp ;
KintN = N*Lint ;
KintD = D*Lint ;
KsmN = N*Lsm ;
KsmD = D*Lsm ;
KimIntN = N*LimInt ;
KimIntD = D*LimInt ;
KcEdN = N*LcEd ;
KcEdD = D*LcEd ;
KpN = N*Lp ;
KpD = D*Lp ;

```

```
%#####for mito and lyso compartments in cEp, sm and cEd#####
```

```
LcEpMito = 0.05 ;
LcEpLyso = 0.05 ;
LsmMito = 0.05 ;
LsmLyso = 0.05 ;
LcEdMito = 0.05 ;
LcEdLyso = 0.05 ;
```

```
WcEpMito = 1-LcEpMito ;
WcEpLyso = 1-LcEpLyso ;
WsmMito = 1-LsmMito ;
WsmLyso = 1-LsmLyso ;
WcEdMito = 1-LcEdMito ;
WcEdLyso = 1-LcEdLyso ;
```

```
GcEpMitoN = 1.23 ;
GcEpMitoD = 0.74 ;
GcEpLysoN = 1.23 ;
GcEpLysoD = 0.74 ;
```

```
GsmMitoN = 1.23 ;
GsmMitoD = 0.74 ;
GsmLysoN = 1.23 ;
GsmLysoD = 0.74 ;
```

```
GcEdMitoN = 1.23 ;
GcEdMitoD = 0.74 ;
GcEdLysoN = 1.23 ;
GcEdLysoD = 0.74 ;
```

```
EcEpMito = -0.16 ;
EcEpLyso = +0.01 ;
EsmMito = -0.16 ;
EsmLyso = +0.01 ;
EcEdMito = -0.16 ;
EcEdLyso = +0.01 ;
```

```
pHcEpMito = 8 ;
pHcEpLyso = 5 ;
pHsmMito = 8 ;
pHsmLyso = 5 ;
pHcEdMito = 8 ;
pHcEdLyso = 5 ;
```

```
NcEpMito = C*EcEpMito ;
NcEpLyso = C*EcEpLyso ;
NsmMito = C*EsmMito ;
NsmLyso = C*EsmLyso ;
NcEdMito = C*EcEdMito ;
NcEdLyso = C*EcEdLyso ;
```

```
KcEpMitoN = N*LcEpMito ;
```

KcEpMitoD = D\*LcEpMito ;  
KcEpLysoN = N\*LcEpLyso ;  
KcEpLysoD = D\*LcEpLyso ;

KsmMitoN = N\*LsmMito ;  
KsmMitoD = D\*LsmMito ;  
KsmLysoN = N\*LsmLyso ;  
KsmLysoD = D\*LsmLyso ;

KcEdMitoN = N\*LcEdMito ;  
KcEdMitoD = D\*LcEdMito ;  
KcEdLysoN = N\*LcEdLyso ;  
KcEdLysoD = D\*LcEdLyso ;

fcEpMitoN = 1/(WcEpMito/GcEpMitoN+KcEpMitoN/GcEpMitoN+WcEpMito\*10^(i\*(pHcEpMito-pKa))/GcEpMitoD...  
+KcEpMitoD\*10^(i\*(pHcEpMito-pKa))/GcEpMitoD);  
fcEpMitoD = fcEpMitoN\*10^(i\*(pHcEpMito-pKa));

fcEpLysoN = 1/(WcEpLyso/GcEpLysoN+KcEpLysoN/GcEpLysoN+WcEpLyso\*10^(i\*(pHcEpLyso-pKa))/GcEpLysoD...  
+KcEpLysoD\*10^(i\*(pHcEpLyso-pKa))/GcEpLysoD);  
fcEpLysoD = fcEpLysoN\*10^(i\*(pHcEpLyso-pKa));

fsmMitoN = 1/(WsmMito/GsmMitoN+KsmMitoN/GsmMitoN+WsmMito\*10^(i\*(pHsmMito-pKa))/GsmMitoD...  
+KsmMitoD\*10^(i\*(pHsmMito-pKa))/GsmMitoD);  
fsmMitoD = fsmMitoN\*10^(i\*(pHsmMito-pKa));

fsmLysoN = 1/(WsmLyso/GsmLysoN+KsmLysoN/GsmLysoN+WsmLyso\*10^(i\*(pHsmLyso-pKa))/GsmLysoD...  
+KsmLysoD\*10^(i\*(pHsmLyso-pKa))/GsmLysoD);  
fsmLysoD = fsmLysoN\*10^(i\*(pHsmLyso-pKa));

fcEdMitoN = 1/(WcEdMito/GcEdMitoN+KcEdMitoN/GcEdMitoN+WcEdMito\*10^(i\*(pHcEdMito-pKa))/GcEdMitoD...  
+KcEdMitoD\*10^(i\*(pHcEdMito-pKa))/GcEdMitoD);  
fcEdMitoD = fcEdMitoN\*10^(i\*(pHcEdMito-pKa));

fcEdLysoN = 1/(WcEdLyso/GcEdLysoN+KcEdLysoN/GcEdLysoN+WcEdLyso\*10^(i\*(pHcEdLyso-pKa))/GcEdLysoD...  
+KcEdLysoD\*10^(i\*(pHcEdLyso-pKa))/GcEdLysoD);  
fcEdLysoD = fcEdLysoN\*10^(i\*(pHcEdLyso-pKa));

%#####

%compute the fn and fd for 8 compartments

faEpN = 1/(WaEp/GaEpN+KaEpN/GaEpN+WaEp\*10^(i\*(pHaEp-pKa))/GaEpD...  
+KaEpD\*10^(i\*(pHaEp-pKa))/GaEpD);  
faEpD = faEpN\*10^(i\*(pHaEp-pKa));  
fimEpN = 1/(WimEp/GimEpN+KimEpN/GimEpN+WimEp\*10^(i\*(pHimEp-pKa))/GimEpD...  
+KimEpD\*10^(i\*(pHimEp-pKa))/GimEpD);  
fimEpD = fimEpN\*10^(i\*(pHimEp-pKa));  
fcEpN = 1/(WcEp/GcEpN+KcEpN/GcEpN+WcEp\*10^(i\*(pHcEp-pKa))/GcEpD...

```

+KcEpD*10^(i*(pHcEp-pKa))/GcEpD);
fcEpD = fcEpN*10^(i*(pHcEp-pKa));
fintN = 1/(Wint/GintN+KintN/GintN+Wint*10^(i*(pHint-pKa))/GintD...
+KintD*10^(i*(pHint-pKa))/GintD);
fintD = fintN*10^(i*(pHint-pKa));
fimIntN = 1/(WimInt/GimIntN+KimIntN/GimIntN+WimInt*10^(i*(pHimInt-pKa))/GimIntD...
+KimIntD*10^(i*(pHimInt-pKa))/GimIntD);
fimIntD = fimIntN*10^(i*(pHimInt-pKa));
fsmN = 1/(Wsm/GsmN+KsmN/GsmN+Wsm*10^(i*(pHsm-pKa))/GsmD...
+KsmD*10^(i*(pHsm-pKa))/GsmD);
fsmD = fsmN*10^(i*(pHsm-pKa));
fcEdN = 1/(WcEd/GcEdN+KcEdN/GcEdN+WcEd*10^(i*(pHcEd-pKa))/GcEdD...
+KcEdD*10^(i*(pHcEd-pKa))/GcEdD);
fcEdD = fcEdN*10^(i*(pHcEd-pKa));
fpN = 1/(Wp/GpN+KpN/GpN+Wp*10^(i*(pHp-pKa))/GpD...
+KpD*10^(i*(pHp-pKa))/GpD);
fpD = fpN*10^(i*(pHp-pKa));

```

%mucus clearance: optional

```
Ke = 0;
```

%compute the coefficient matrix for ODEs

% #1: Surface Lining Liquid (aEp)

```

KaEp_aEp = AaEp/VaEp*(Pn*(-faEpN)+Pd*NaEp/(exp(NaEp)-1)*(-faEpD)*exp(NaEp))...
-AimEp/VaEp*(Pn*faEpN+Pd*NimEp/(exp(NimEp)-1)*faEpD)...
-Ke;

```

```
KaEp_imEp = -AimEp/VaEp*(Pn*(-fimEpN)+Pd*NimEp/(exp(NimEp)-1)*(-fimEpD)*exp(NimEp));
```

```
KaEp_cEp = AaEp/VaEp*(Pn*(fcEpN)+Pd*NaEp/(exp(NaEp)-1)*(fcEpD));
```

```
KaEp_cEpMito = 0;
```

```
KaEp_cEpLyso = 0;
```

```
KaEp_int = 0;
```

```
KaEp_sm = 0;
```

```
KaEp_smMito = 0;
```

```
KaEp_smLyso = 0;
```

```
KaEp_imInt = 0;
```

```
KaEp_cEd = 0;
```

```
KaEp_cEdMito = 0;
```

```
KaEp_cEdLyso = 0;
```

```
KaEp_p = 0;
```

```
SaEp = 0;
```

% #2: Macrophage (imEp)

```
KimEp_aEp = AimEp/VimEp*(Pn*faEpN+Pd*NimEp/(exp(NimEp)-1)*faEpD);
```

```
KimEp_imEp = AimEp/VimEp*(Pn*(-fimEpN)+Pd*NimEp/(exp(NimEp)-1)*(-fimEpD)*exp(NimEp));
```

```
KimEp_cEp = 0;
```

```
KimEp_cEpMito = 0 ;
```

```
KimEp_cEpLyso = 0 ;
```

```
KimEp_int = 0;
```

```
KimEp_sm = 0;
```

```
KimEp_smMito = 0;
```

```
KimEp_smLyso = 0;
```

```
KimEp_imInt = 0;
```

```
KimEp_cEd = 0;
```

```
KimEp_cEdMito = 0 ;
```

```
KimEp_cEdLyso = 0 ;
```

```
KimEp_p = 0;
```

SimEp = 0;

**% #3: Epithelial Cells (cEp)**

```
KcEp_aEp = -AaEp/VcEp*(Pn*(-faEpN)+Pd*NaEp/(exp(NaEp)-1)*(-faEpD)*exp(NaEp));
KcEp_imEp = 0;
KcEp_cEp = -AaEp/VcEp*(Pn*(fcEpN)+Pd*NaEp/(exp(NaEp)-1)*(fcEpD))...
    -AcEpMito/VcEp*(Pn*fcEpN+Pd*NcEpMito/(exp(NcEpMito)-1)*fcEpD)...
    -AcEpLyso/VcEp*(Pn*fcEpN+Pd*NcEpLyso/(exp(NcEpLyso)-1)*fcEpD)...
    +AbEp/VcEp*(Pn*(-fcEpN)+Pd*NbEp/(exp(NbEp)-1)*(-fcEpD)*exp(NbEp));
KcEp_cEpMito = -AcEpMito/VcEp*(Pn*(-fcEpMitoN)+Pd*NcEpMito/(exp(NcEpMito)-1)*(-
    fcEpMitoD)*exp(NcEpMito)) ;
KcEp_cEpLyso = -AcEpLyso/VcEp*(Pn*(-fcEpLysoN)+Pd*NcEpLyso/(exp(NcEpLyso)-1)*(-
    fcEpLysoD)*exp(NcEpLyso)) ;
KcEp_int = AbEp/VcEp*(Pn*(fintN)+Pd*NbEp/(exp(NbEp)-1)*(fintD));
KcEp_sm = 0;
KcEp_smMito = 0;
KcEp_smLyso = 0;
KcEp_imInt = 0;
KcEp_cEd = 0;
KcEp_cEdMito = 0 ;
KcEp_cEdLyso = 0 ;
KcEp_p = 0;
ScEp = 0;
```

**% #4: : Epithelial Cells (cEpMito)**

```
KcEpMito_aEp = 0;
KcEpMito_imEp = 0;
KcEpMito_cEp = AcEpMito/VcEpMito*(Pn*(fcEpN)+Pd*NcEpMito/(exp(NcEpMito)-1)*(fcEpD));
KcEpMito_cEpMito = AcEpMito/VcEpMito*(Pn*(-fcEpMitoN)+Pd*NcEpMito/(exp(NcEpMito)-1)*(-
    fcEpMitoD)*exp(NcEpMito));
KcEpMito_cEpLyso = 0 ;
KcEpMito_int = 0 ;
KcEpMito_sm = 0;
KcEpMito_smMito = 0;
KcEpMito_smLyso = 0;
KcEpMito_imInt = 0;
KcEpMito_cEd = 0;
KcEpMito_cEdMito = 0 ;
KcEpMito_cEdLyso = 0 ;
KcEpMito_p = 0;
ScEpMito = 0;
```

**% #5: : Epithelial Cells (cEpLyso)**

```
KcEpLyso_aEp = 0;
KcEpLyso_imEp = 0;
KcEpLyso_cEp = AcEpLyso/VcEpLyso*(Pn*(fcEpN)+Pd*NcEpLyso/(exp(NcEpLyso)-1)*(fcEpD));
KcEpLyso_cEpMito = 0 ;
KcEpLyso_cEpLyso = AcEpLyso/VcEpLyso*(Pn*(-fcEpLysoN)+Pd*NcEpLyso/(exp(NcEpLyso)-1)*(-
    fcEpLysoD)*exp(NcEpLyso));
KcEpLyso_int = 0 ;
KcEpLyso_sm = 0;
KcEpLyso_smMito = 0;
KcEpLyso_smLyso = 0;
KcEpLyso_imInt = 0;
KcEpLyso_cEd = 0;
KcEpLyso_cEdMito = 0 ;
```

```

KcEpLyso_cEdLyso = 0 ;
KcEpLyso_p = 0;
ScEpLyso = 0;

% #6: Interstitium (int)
Kint_aEp = 0;
Kint_imEp = 0;
Kint_cEp = -AbEp/Vint*(Pn*(-fcEpN)+Pd*NbEp/(exp(NbEp)-1)*(-fcEpD)*exp(NbEp));
Kint_cEpMito = 0 ;
Kint_cEpLyso = 0 ;
Kint_int = -AbEp/Vint*(Pn*(fintN)+Pd*NbEp/(exp(NbEp)-1)*(fintD))...
    -Asm/Vint*(Pn*fintN+Pd*Nsm/(exp(Nsm)-1)*fintD)...
    -AimInt/Vint*(Pn*fintN+Pd*NimInt/(exp(NimInt)-1)*fintD)...
    +AbEd/Vint*(Pn*(-fintN)+Pd*NbEd/(exp(NbEd)-1)*(-fintD)*exp(NbEd));
Kint_sm = -Asm/Vint*(Pn*(-fsmN)+Pd*Nsm/(exp(Nsm)-1)*(-fsmD)*exp(Nsm));
Kint_smMito = 0;
Kint_smLyso = 0;
Kint_imInt = -AimInt/Vint*(Pn*(-fimIntN)+Pd*NimInt/(exp(NimInt)-1)*(-fimIntD)*exp(NimInt));
Kint_cEd = AbEd/Vint*(Pn*(fcEdN)+Pd*NbEd/(exp(NbEd)-1)*(fcEdD));
Kint_cEdMito = 0 ;
Kint_cEdLyso = 0 ;
Kint_p = 0;
Sint = 0;

```

```

% #7: Smooth Muscle (sm)
Ksm_aEp = 0;
Ksm_imEp = 0;
Ksm_cEp = 0;
Ksm_cEpMito = 0 ;
Ksm_cEpLyso = 0 ;
Ksm_int = Asm/Vsm*(Pn*fintN+Pd*Nsm/(exp(Nsm)-1)*fintD);
Ksm_sm = Asm/Vsm*(Pn*(-fsmN)+Pd*Nsm/(exp(Nsm)-1)*(-fsmD)*exp(Nsm))...
    -AsmMito/Vsm*(Pn*fsmN+Pd*NsmMito/(exp(NsmMito)-1)*fsmD)...
    -AsmLyso/Vsm*(Pn*fsmN+Pd*NsmLyso/(exp(NsmLyso)-1)*fsmD);
Ksm_smMito = -AsmMito/Vsm*(Pn*(-fsmMitoN)+Pd*NsmMito/(exp(NsmMito)-1)*(-fsmMitoD)*exp(NsmMito)) ;
Ksm_smLyso = -AsmLyso/Vsm*(Pn*(-fsmLysoN)+Pd*NsmLyso/(exp(NsmLyso)-1)*(-fsmLysoD)*exp(NsmLyso)) ;
Ksm_imInt = 0;
Ksm_cEd = 0;
Ksm_cEdMito = 0 ;
Ksm_cEdLyso = 0 ;
Ksm_p = 0;
Ssm = 0;

```

```

% #8: Smooth Muscle (smMito)
KsmMito_aEp = 0;
KsmMito_imEp = 0;
KsmMito_cEp = 0;
KsmMito_cEpMito = 0;
KsmMito_cEpLyso = 0 ;
KsmMito_int = 0 ;
KsmMito_sm = AsmMito/VsmMito*(Pn*(fsmN)+Pd*NsmMito/(exp(NsmMito)-1)*(fsmD));
KsmMito_smMito = AsmMito/VsmMito*(Pn*(-fsmMitoN)+Pd*NsmMito/(exp(NsmMito)-1)*(-fsmMitoD)*exp(NsmMito));

```

```

KsmMito_smLyso = 0;
KsmMito_imInt = 0;
KsmMito_cEd = 0;
KsmMito_cEdMito = 0 ;
KsmMito_cEdLyso = 0 ;
KsmMito_p = 0;
SsmMito = 0;

% #9: Smooth Muscle (smLyso)
KsmLyso_aEp = 0;
KsmLyso_imEp = 0;
KsmLyso_cEp = 0;
KsmLyso_cEpMito = 0 ;
KsmLyso_cEpLyso = 0;
KsmLyso_int = 0 ;
KsmLyso_sm = AsmLyso/VsmLyso*(Pn*(fsmN)+Pd*NsmLyso/(exp(NsmLyso)-1)*(fsmD));
KsmLyso_smMito = 0;
KsmLyso_smLyso = AsmLyso/VsmLyso*(Pn*(-fsmLysoN)+Pd*NsmLyso/(exp(NsmLyso)-1)*(-fsmLysoD)*exp(NsmLyso));
KsmLyso_imInt = 0;
KsmLyso_cEd = 0;
KsmLyso_cEdMito = 0 ;
KsmLyso_cEdLyso = 0 ;
KsmLyso_p = 0;
SsmLyso = 0;

% #10: Immune Cells (imInt)
KimInt_aEp = 0;
KimInt_imEp = 0;
KimInt_cEp = 0;
KimInt_cEpMito = 0;
KimInt_cEpLyso = 0;
KimInt_int = AimInt/VimInt*(Pn*fintN+Pd*NimInt/(exp(NimInt)-1)*fintD);
KimInt_sm = 0;
KimInt_smMito = 0;
KimInt_smLyso = 0;
KimInt_imInt = AimInt/VimInt*(Pn*(-fimIntN)+Pd*NimInt/(exp(NimInt)-1)*(-fimIntD)*exp(NimInt));
KimInt_cEd = 0;
KimInt_cEdMito = 0;
KimInt_cEdLyso = 0;
KimInt_p = 0;
SimInt = 0;

% #11: Endothelial celss (cEd)
KcEd_aEp = 0;
KcEd_imEp = 0;
KcEd_cEp = 0;
KcEd_cEpMito = 0;
KcEd_cEpLyso = 0;
KcEd_int = -AbEd/VcEd*(Pn*(-fintN)+Pd*NbEd/(exp(NbEd)-1)*(-fintD)*exp(NbEd));
KcEd_sm = 0;
KcEd_smMito = 0;
KcEd_smLyso = 0;
KcEd_imInt = 0;
KcEd_cEd = -AbEd/VcEd*(Pn*(fcEdN)+Pd*NbEd/(exp(NbEd)-1)*(fcEdD))...
-AcEdMito/VcEd*(Pn*fcEdN+Pd*NcEdMito/(exp(NcEdMito)-1)*fcEdD)...

```

```

        -AcEdLyso/VcEd*(Pn*fcEdN+Pd*NcEdLyso/(exp(NcEdLyso)-1)*fcEdD)...
        +AaEd/VcEd*(Pn*(-fcEdN)+Pd*NaEd/(exp(NaEd)-1)*(-fcEdD)*exp(NaEd));
KcEd_cEdMito = -AcEdMito/VcEd*(Pn*(-fcEdMitoN)+Pd*NcEdMito/(exp(NcEdMito)-1)*(-
fcEdMitoD)*exp(NcEdMito));
KcEd_cEdLyso = -AcEdLyso/VcEd*(Pn*(-fcEdLysoN)+Pd*NcEdLyso/(exp(NcEdLyso)-1)*(-
fcEdLysoD)*exp(NcEdLyso));
KcEd_p = AaEd/VcEd*(Pn*(fpN)+Pd*NaEd/(exp(NaEd)-1)*(fpD));
ScEd = 0;

```

#### % #12: Endothelial celss (cEd) Mito

```

KcEdMito_aEp = 0;
KcEdMito_imEp = 0;
KcEdMito_cEp = 0;
KcEdMito_cEpMito = 0;
KcEdMito_cEpLyso = 0;
KcEdMito_int = 0;
KcEdMito_sm = 0;
KcEdMito_smMito = 0;
KcEdMito_smLyso = 0;
KcEdMito_imInt = 0;
KcEdMito_cEd = AcEdMito/VcEdMito*(Pn*(fcEdN)+Pd*NcEdMito/(exp(NcEdMito)-1)*(fcEdD)) ;
KcEdMito_cEdMito = AcEdMito/VcEdMito*(Pn*(-fcEdMitoN)+Pd*NcEdMito/(exp(NcEdMito)-1)*(-
fcEdMitoD)*exp(NcEdMito));
KcEdMito_cEdLyso = 0;
KcEdMito_p = 0 ;
ScEdMito = 0;

```

#### % #13: Endothelial celss (cEd) Lyso

```

KcEdLyso_aEp = 0;
KcEdLyso_imEp = 0;
KcEdLyso_cEp = 0;
KcEdLyso_cEpMito = 0;
KcEdLyso_cEpLyso = 0;
KcEdLyso_int = 0 ;
KcEdLyso_sm = 0;
KcEdLyso_smMito = 0;
KcEdLyso_smLyso = 0;
KcEdLyso_imInt = 0;
KcEdLyso_cEd = AcEdLyso/VcEdLyso*(Pn*(fcEdN)+Pd*NcEdLyso/(exp(NcEdLyso)-1)*(fcEdD)) ;
KcEdLyso_cEdMito = 0;
KcEdLyso_cEdLyso = AcEdLyso/VcEdLyso*(Pn*(-fcEdLysoN)+Pd*NcEdLyso/(exp(NcEdLyso)-1)*(-
fcEdLysoD)*exp(NcEdLyso));
KcEdLyso_p = 0;
ScEdLyso = 0;

```

#### % #14: plasma(p)

```

Kp_aEp = 0;
Kp_imEp = 0;
Kp_cEp = 0;
Kp_cEpMito = 0;
Kp_cEpLyso = 0;
Kp_int = 0;
Kp_sm = 0;
Kp_smMito = 0;
Kp_smLyso = 0;
Kp_imInt = 0;

```

$Kp\_cEd = -AaEd/Vp*(Pn*(-fcEdN)+Pd*NaEd/(exp(NaEd)-1)*(-fcEdD)*exp(NaEd));$   
 $Kp\_cEdMito = 0;$   
 $Kp\_cEdLyso = 0;$   
 $Kp\_p = -AaEd/Vp*(Pn*(fpN)+Pd*NaEd/(exp(NaEd)-1)*(fpD));$   
 $Sp = 0;$

$M =$   
 $[KaEp\_aEp,KaEp\_imEp,KaEp\_cEp,KaEp\_cEpMito,KaEp\_cEpLyso,KaEp\_int,KaEp\_sm,KaEp\_smMito,KaEp\_smLyso,KaEp\_imInt,KaEp\_cEd,KaEp\_cEdMito,KaEp\_cEdLyso,KaEp\_p;...$

$KimEp\_aEp,KimEp\_imEp,KimEp\_cEp,KimEp\_cEpMito,KimEp\_cEpLyso,KimEp\_int,KimEp\_sm,KimEp\_smMito,$   
 $KimEp\_smLyso,KimEp\_imInt,KimEp\_cEd,KimEp\_cEdMito,KimEp\_cEdLyso,KimEp\_p;...$

$KcEp\_aEp,KcEp\_imEp,KcEp\_cEp,KcEp\_cEpMito,KcEp\_cEpLyso,KcEp\_int,KcEp\_sm,KcEp\_smMito,KcEp\_smLyso,$   
 $KcEp\_imInt,KcEp\_cEd,KcEp\_cEdMito,KcEp\_cEdLyso,KcEp\_p;...$

$KcEpMito\_aEp,KcEpMito\_imEp,KcEpMito\_cEp,KcEpMito\_cEpMito,KcEpMito\_cEpLyso,KcEpMito\_int,KcEpMi$   
 $to\_sm,KcEpMito\_smMito,KcEpMito\_smLyso,KcEpMito\_imInt,KcEpMito\_cEd,KcEpMito\_cEdMito,KcEpMito\_c$   
 $EdLyso,KcEpMito\_p;...$

$KcEpLyso\_aEp,KcEpLyso\_imEp,KcEpLyso\_cEp,KcEpLyso\_cEpMito,KcEpLyso\_cEpLyso,KcEpLyso\_int,KcEpL$   
 $ys\_sm,KcEpLyso\_smMito,KcEpLyso\_smLyso,KcEpLyso\_imInt,KcEpLyso\_cEd,KcEpLyso\_cEdMito,KcEpLyso\_c$   
 $EdLyso,KcEpLyso\_p;...$

$Kint\_aEp,Kint\_imEp,Kint\_cEp,Kint\_cEpMito,Kint\_cEpLyso,Kint\_int,Kint\_sm,Kint\_smMito,Kint\_smLyso,Kint\_i$   
 $mInt,Kint\_cEd,Kint\_cEdMito,Kint\_cEdLyso,Kint\_p;...$

$Ksm\_aEp,Ksm\_imEp,Ksm\_cEp,Ksm\_cEpMito,Ksm\_cEpLyso,Ksm\_int,Ksm\_sm,Ksm\_smMito,Ksm\_smLyso,Ksm$   
 $\_imInt,Ksm\_cEd,Ksm\_cEdMito,Ksm\_cEdLyso,Ksm\_p;...$

$KsmMito\_aEp,KsmMito\_imEp,KsmMito\_cEp,KsmMito\_cEpMito,KsmMito\_cEpLyso,KsmMito\_int,KsmMito\_sm,$   
 $KsmMito\_smMito,KsmMito\_smLyso,KsmMito\_imInt,KsmMito\_cEd,KsmMito\_cEdMito,KsmMito\_cEdLyso,Ksm$   
 $Mito\_p;...$

$KsmLyso\_aEp,KsmLyso\_imEp,KsmLyso\_cEp,KsmLyso\_cEpMito,KsmLyso\_cEpLyso,KsmLyso\_int,KsmLyso\_sm$   
 $,KsmLyso\_smMito,KsmLyso\_smLyso,KsmLyso\_imInt,KsmLyso\_cEd,KsmLyso\_cEdMito,KsmLyso\_cEdLyso,Ks$   
 $mLyso\_p;...$

$KimInt\_aEp,KimInt\_imEp,KimInt\_cEp,KimInt\_cEpMito,KimInt\_cEpLyso,KimInt\_int,KimInt\_sm,KimInt\_smMito,$   
 $KimInt\_smLyso,KimInt\_imInt,KimInt\_cEd,KimInt\_cEdMito,KimInt\_cEdLyso,KimInt\_p;...$

$KcEd\_aEp,KcEd\_imEp,KcEd\_cEp,KcEd\_cEpMito,KcEd\_cEpLyso,KcEd\_int,KcEd\_sm,KcEd\_smMito,KcEd\_smL$   
 $ys\_sm,KcEd\_imInt,KcEd\_cEd,KcEd\_cEdMito,KcEd\_cEdLyso,KcEd\_p;...$

$KcEdMito\_aEp,KcEdMito\_imEp,KcEdMito\_cEp,KcEdMito\_cEpMito,KcEdMito\_cEpLyso,KcEdMito\_int,KcEdMi$   
 $to\_sm,KcEdMito\_smMito,KcEdMito\_smLyso,KcEdMito\_imInt,KcEdMito\_cEd,KcEdMito\_cEdMito,KcEdMito\_c$   
 $EdLyso,KcEdMito\_p;...$

$KcEdLyso\_aEp,KcEdLyso\_imEp,KcEdLyso\_cEp,KcEdLyso\_cEpMito,KcEdLyso\_cEpLyso,KcEdLyso\_int,KcEdL$   
 $ys\_sm,KcEdLyso\_smMito,KcEdLyso\_smLyso,KcEdLyso\_imInt,KcEdLyso\_cEd,KcEdLyso\_cEdMito,KcEdLyso\_c$   
 $EdLyso,KcEdLyso\_p;...$

$Kp\_aEp,Kp\_imEp,Kp\_cEp,Kp\_cEpMito,Kp\_cEpLyso,Kp\_int,Kp\_sm,Kp\_smMito,Kp\_smLyso,Kp\_imInt,Kp\_cEd,$   
 $Kp\_cEdMito,Kp\_cEdLyso,Kp\_p];$

$G = [SaEp,SimEp,ScEp,ScEpMito,ScEpLyso,Sint,Ssm,SsmMito,SsmLyso,SimInt,ScEd,ScEdMito,ScEdLyso,Sp]';$

```

% 4/30/2009
% 1CellPK based lung-Alveoli model starts here (Rats)
% 12 compartments:
% aEp (surface lining liquied), imEp (Macrophage),
% cEp(epithelial cells),cEpMito(mito of cEp), cEpLyso (lyso of cEp)
% int(Interstitial),imInt(immune cells), sm(smooth muscle),
% cEd(endothelial cells), cEdMito(mito of cEd),cEdLyso (lyso of cEd), p(plasma)

function [M, G, M_v, Vp] = Lung_AL(pKa,logPN)

% Constant
T = 273.15+37;
R = 8.314;
F = 96484.56;
%lipid fraction
LaEp = 0.95;
LimEp = 0.05;
LcEp = 0.05 ;
Lint = 0.05;
LimInt = 0.05;
Lsm = 0;
LcEd = 0.05;
Lp = 0;
%volumetric water fraction=1-lipid fraction
WaEp = 1 - LaEp;
WimEp = 1 - LimEp;
WcEp = 1 - LcEp;
Wint = 1 - Lint;
WimInt = 1 - LimInt;
Wsm = 1 - Lsm;
WcEd = 1 - LcEd;
Wp = 1 - Lp;
%activity coefficient of species(N:neutral,D:desociated)
GaEpN = 1;
GaEpD = 1;
GimEpN = 1.23;
GimEpD = 0.74;
GcEpN = 1.23;
GcEpD = 0.74;
GintN = 1;
GintD = 1;
GimIntN = 1.23;
GimIntD = 0.74;
GsmN = 1.23;
GsmD = 0.74;
GcEdN = 1.23;
GcEdD = 0.74;
GpN = 1;
GpD = 1;

% By Jingyu Yu (used in publication,J YU Pharm Res, 2010) Areas and volumes (m^2, m^3) for 7 membranes and
corresponding compartments
AaEp = 0.387;%
AbEp = AaEp;%Assuming same with epical side
AimEp = 3.14*10^(-10)*0.89*10^(9)*3/100/2; % 10 um diameter, only half of surface gets contact with liquid,
since ASL = 5 um

```

```

AimInt = AimEp/10; % assuming number of immune cells is 1/10 of macrophage
Asm = 0;%No SM
AbEd = 0.452;%literature
AaEd = 0.452;%literature
%volumes for 8 compartments(m3)
ASL = 10; %literature um
VaEp = AaEp*ASL*10^(-6); %5 um thickness
VcEp = AaEp*0.384*10^(-6); % 0.384, literature
VimEp = 0.89*10^(9)*3/100*1058*10^(-18);%number of macrophage(literature)*volume of macrophage
Vint = AaEp*0.693*10^(-6); % literature
VimInt = VimEp/10;% assuming number of immune cells is 1/10 of macrophage
Vsm = 10^(-30); % VcEp*10^(-12); % can be any number, surface is 0
VcEd = AbEd*0.358*10^(-6); %0.358 um thickness --literature
Vp = 5; %total huge volume for lung absorption model

#####
% Subcellular compartments in cEp (epithelial cells) and cEd(endothelial cells)
% calculate constant
VcEpMito = 0.1*VcEp ; % 10^(-30); %
VcEpLyso = 0.1*VcEp ; % 10^(-30); %
VcEdMito = 0.1*VcEd ; % 10^(-30); %
VcEdLyso = 0.1*VcEd ; % 10^(-30); %

AcEpMito = 5.9924e+006*VcEpMito; % 0 ;
AcEpLyso = 5.9924e+006*VcEpLyso; % 0 ;
AcEdMito = 5.9924e+006*VcEdMito; % 0 ;
AcEdLyso = 5.9924e+006*VcEdLyso; % 0 ;
#####

M_v = diag([VaEp,VimEp,VcEp,VcEpMito,VcEpLyso,Vint,Vsm,VimInt,VcEd,VcEdMito,VcEdLyso]);
V_LUN = trace(M_v)*10^6;

% Membrane potential (V)
EaEp = -0.0093;
EbEp = 0.0019;%0.0119;
EimEp = -0.06;
EimInt = -0.06;
Esm = -0.06;
EbEd = -0.06;
EaEd = -0.06;
% pH values
pHaEp = 7.4;
pHimEp = 7.0;
pHcEp = 7.0;
pHint = 7.0;
pHimInt = 7.0;
pHsm = 7.0;
pHcEd = 7.0;
pHp = 7.4;

%molecular physiochemical property
logPD = logPN-3.7 ;

```

```

z = 1;

%adjustment for logP
if ( abs(z-1) <= 10^(-6) )
    logP_nlipT = 0.33*logPN+2.2 ;
    logP_dlipT = 0.37*logPD+2 ;
end
if ( abs(z+1) <= 10^(-6) )
    logP_nlipT = 0.37*logPN+2.2 ;
    logP_dlipT = 0.33*logPD+2.6 ;
end
if ( abs(z-0) <= 10^(-5) )
    logP_nlipT = 0.33*logPN+2.2 ;
    logP_dlipT = 0.33*logPD+2.2 ;
end

% Get the first two decimals
logP_n = round(logP_nlipT*100)/100 ;
logP_d = round(logP_dlipT*100)/100 ;
%calculate the membrane permeability

Pn = 10^(logP_n-6.7)*60; % in 1/min
Pd = 10^(logP_d-6.7)*60; % in 1/min

i = -sign(z) ;
%calculate N for flux of ion happening at 7 membranes
C = z*F/(R*T);
NaEp = C*(-EaEp) ;
NbEp = C*EbEp ;
NimEp = C*EimEp ;
NimInt = C*EimInt ;
Nsm = C*Esm ;
NbEd = C*(-EbEd) ;
NaEd = C*(EaEd) ;

%calculate Kn and Kd for 8 compartments
N = 1.22*10^(logP_n);
D = 1.22*10^(logP_d);
KaEpN = N*LaEp ;
KaEpD = D*LaEp ;
KimEpN = N*LimEp ;
KimEpD = D*LimEp ;
KcEpN = N*LcEp ;
KcEpD = D*LcEp ;
KintN = N*Lint ;
KintD = D*Lint ;
KimIntN = N*LimInt ;
KimIntD = D*LimInt ;
KsmN = N*Lsm ;
KsmD = D*Lsm ;
KcEdN = N*LcEd ;
KcEdD = D*LcEd ;
KpN = N*Lp ;
KpD = D*Lp ;

```

```

#####
LcEpMito = 0.05 ;
LcEpLyso = 0.05 ;
LcEdMito = 0.05 ;
LcEdLyso = 0.05 ;

WcEpMito = 1-LcEpMito ;
WcEpLyso = 1-LcEpLyso ;
WcEdMito = 1-LcEdMito ;
WcEdLyso = 1-LcEdLyso ;

GcEpMitoN = 1.23 ;
GcEpMitoD = 0.74 ;
GcEpLysoN = 1.23 ;
GcEpLysoD = 0.74 ;
GcEdMitoN = 1.23 ;
GcEdMitoD = 0.74 ;
GcEdLysoN = 1.23 ;
GcEdLysoD = 0.74 ;

EcEpMito = -0.16 ;
EcEpLyso = +0.01 ;
EcEdMito = -0.16 ;
EcEdLyso = +0.01 ;

pHcEpMito = 8 ;
pHcEpLyso = 5 ;
pHcEdMito = 8 ;
pHcEdLyso = 5 ;

NcEpMito = C*EcEpMito ;
NcEpLyso = C*EcEpLyso ;
NcEdMito = C*EcEdMito ;
NcEdLyso = C*EcEdLyso ;

KcEpMitoN = N*LcEpMito ;
KcEpMitoD = D*LcEpMito ;
KcEpLysoN = N*LcEpLyso ;
KcEpLysoD = D*LcEpLyso ;

KcEdMitoN = N*LcEdMito ;
KcEdMitoD = D*LcEdMito ;
KcEdLysoN = N*LcEdLyso ;
KcEdLysoD = D*LcEdLyso ;

fcEpMitoN = 1/(WcEpMito/GcEpMitoN+KcEpMitoN/GcEpMitoN+WcEpMito*10^(i*(pHcEpMito-
pKa))/GcEpMitoD...
+KcEpMitoD*10^(i*(pHcEpMito-pKa))/GcEpMitoD);
fcEpMitoD = fcEpMitoN*10^(i*(pHcEpMito-pKa));

fcEpLysoN = 1/(WcEpLyso/GcEpLysoN+KcEpLysoN/GcEpLysoN+WcEpLyso*10^(i*(pHcEpLyso-
pKa))/GcEpLysoD...
+KcEpLysoD*10^(i*(pHcEpLyso-pKa))/GcEpLysoD);

```

```

fcEpLysoD = fcEpLysoN*10^(i*(pHcEpLyso-pKa));

fcEdMitoN = 1/(WcEdMito/GcEdMitoN+KcEdMitoN/GcEdMitoN+WcEdMito*10^(i*(pHcEdMito-
pKa))/GcEdMitoD...
+KcEdMitoD*10^(i*(pHcEdMito-pKa))/GcEdMitoD);
fcEdMitoD = fcEdMitoN*10^(i*(pHcEdMito-pKa));

fcEdLysoN = 1/(WcEdLyso/GcEdLysoN+KcEdLysoN/GcEdLysoN+WcEdLyso*10^(i*(pHcEdLyso-
pKa))/GcEdLysoD...
+KcEdLysoD*10^(i*(pHcEdLyso-pKa))/GcEdLysoD);
fcEdLysoD = fcEdLysoN*10^(i*(pHcEdLyso-pKa));

%#####

%compute the fn and fd for 8 compartments
faEpN = 1/(WaEp/GaEpN+KaEpN/GaEpN+WaEp*10^(i*(pHaEp-pKa))/GaEpD...
+KaEpD*10^(i*(pHaEp-pKa))/GaEpD);
faEpD = faEpN*10^(i*(pHaEp-pKa));
fimEpN = 1/(WimEp/GimEpN+KimEpN/GimEpN+WimEp*10^(i*(pHimEp-pKa))/GimEpD...
+KimEpD*10^(i*(pHimEp-pKa))/GimEpD);
fimEpD = fimEpN*10^(i*(pHimEp-pKa));
fcEpN = 1/(WcEp/GcEpN+KcEpN/GcEpN+WcEp*10^(i*(pHcEp-pKa))/GcEpD...
+KcEpD*10^(i*(pHcEp-pKa))/GcEpD);
fcEpD = fcEpN*10^(i*(pHcEp-pKa));
fintN = 1/(Wint/GintN+KintN/GintN+Wint*10^(i*(pHint-pKa))/GintD...
+KintD*10^(i*(pHint-pKa))/GintD);
fintD = fintN*10^(i*(pHint-pKa));
fimIntN = 1/(WimInt/GimIntN+KimIntN/GimIntN+WimInt*10^(i*(pHimInt-pKa))/GimIntD...
+KimIntD*10^(i*(pHimInt-pKa))/GimIntD);
fimIntD = fimIntN*10^(i*(pHimInt-pKa));
fsmN = 1/(Wsm/GsmN+KsmN/GsmN+Wsm*10^(i*(pHsm-pKa))/GsmD...
+KsmD*10^(i*(pHsm-pKa))/GsmD);
fsmD = fsmN*10^(i*(pHsm-pKa));
fcEdN = 1/(WcEd/GcEdN+KcEdN/GcEdN+WcEd*10^(i*(pHcEd-pKa))/GcEdD...
+KcEdD*10^(i*(pHcEd-pKa))/GcEdD);
fcEdD = fcEdN*10^(i*(pHcEd-pKa));
fpN = 1/(Wp/GpN+KpN/GpN+Wp*10^(i*(pHp-pKa))/GpD...
+KpD*10^(i*(pHp-pKa))/GpD);
fpD = fpN*10^(i*(pHp-pKa));

% mucus clearance: optional
Ke = 0;

%compute the coefficient matrix for ODEs
% #1: Surface Lining Liquid (aEp)
KaEp_aEp = AaEp/VaEp*(Pn*(-faEpN)+Pd*NaEp/(exp(NaEp)-1)*(-faEpD)*exp(NaEp))...
-AimEp/VaEp*(Pn*faEpN+Pd*NimEp/(exp(NimEp)-1)*faEpD)...
-Ke;
KaEp_imEp = -AimEp/VaEp*(Pn*(-fimEpN)+Pd*NimEp/(exp(NimEp)-1)*(-fimEpD)*exp(NimEp));
KaEp_cEp = AaEp/VaEp*(Pn*(fcEpN)+Pd*NaEp/(exp(NaEp)-1)*(fcEpD));
KaEp_cEpMito = 0;
KaEp_cEpLyso = 0;
KaEp_int = 0;
KaEp_sm = 0;
KaEp_imInt = 0;
KaEp_cEd = 0;

```

```

KaEp_cEdMito = 0;
KaEp_cEdLyso = 0;
KaEp_p = 0;
SaEp = 0;

% #2: Macrophage (imEp)
KimEp_aEp = AimEp/VimEp*(Pn*faEpN+Pd*NimEp/(exp(NimEp)-1)*faEpD);
KimEp_imEp = AimEp/VimEp*(Pn*(-fimEpN)+Pd*NimEp/(exp(NimEp)-1)*(-fimEpD)*exp(NimEp));
KimEp_cEp = 0;
KimEp_cEpMito = 0 ;
KimEp_cEpLyso = 0 ;
KimEp_int = 0;
KimEp_sm = 0;
KimEp_imInt = 0;
KimEp_cEd = 0;
KimEp_cEdMito = 0 ;
KimEp_cEdLyso = 0 ;
KimEp_p = 0;
SimEp = 0;

% #3: Epithelial Cells (cEp)
KcEp_aEp = -AaEp/VcEp*(Pn*(-faEpN)+Pd*NaEp/(exp(NaEp)-1)*(-faEpD)*exp(NaEp));
KcEp_imEp = 0;
KcEp_cEp = -AaEp/VcEp*(Pn*(fcEpN)+Pd*NaEp/(exp(NaEp)-1)*(fcEpD))...
    -AcEpMito/VcEp*(Pn*fcEpN+Pd*NcEpMito/(exp(NcEpMito)-1)*fcEpD)...
    -AcEpLyso/VcEp*(Pn*fcEpN+Pd*NcEpLyso/(exp(NcEpLyso)-1)*fcEpD)...
    + AbEp/VcEp*(Pn*(-fcEpN)+Pd*NbEp/(exp(NbEp)-1)*(-fcEpD)*exp(NbEp));
KcEp_cEpMito = -AcEpMito/VcEp*(Pn*(-fcEpMitoN)+Pd*NcEpMito/(exp(NcEpMito)-1)*(-fcEpMitoD)*exp(NcEpMito)) ;
KcEp_cEpLyso = -AcEpLyso/VcEp*(Pn*(-fcEpLysoN)+Pd*NcEpLyso/(exp(NcEpLyso)-1)*(-fcEpLysoD)*exp(NcEpLyso)) ;
KcEp_int = AbEp/VcEp*(Pn*(fintN)+Pd*NbEp/(exp(NbEp)-1)*(fintD));
KcEp_sm = 0;
KcEp_imInt = 0;
KcEp_cEd = 0;
KcEp_cEdMito = 0 ;
KcEp_cEdLyso = 0 ;
KcEp_p = 0;
ScEp = 0;

% #4: : Epithelial Cells (cEpMito)
KcEpMito_aEp = 0;
KcEpMito_imEp = 0;
KcEpMito_cEp = AcEpMito/VcEpMito*(Pn*(fcEpN)+Pd*NcEpMito/(exp(NcEpMito)-1)*(fcEpD));
KcEpMito_cEpMito = AcEpMito/VcEpMito*(Pn*(-fcEpMitoN)+Pd*NcEpMito/(exp(NcEpMito)-1)*(-fcEpMitoD)*exp(NcEpMito));
KcEpMito_cEpLyso = 0 ;
KcEpMito_int = 0 ;
KcEpMito_sm = 0;
KcEpMito_imInt = 0;
KcEpMito_cEd = 0;
KcEpMito_cEdMito = 0 ;
KcEpMito_cEdLyso = 0 ;
KcEpMito_p = 0;
ScEpMito = 0;

```

#### % #5: : Epithelial Cells (cEpLyso)

```
KcEpLyso_aEp = 0;
KcEpLyso_imEp = 0;
KcEpLyso_cEp = AcEpLyso/VcEpLyso*(Pn*(fcEpN)+Pd*NcEpLyso/(exp(NcEpLyso)-1)*(fcEpD));
KcEpLyso_cEpMito = 0 ;
KcEpLyso_cEpLyso = AcEpLyso/VcEpLyso*(Pn*(-fcEpLysoN)+Pd*NcEpLyso/(exp(NcEpLyso)-1)*(-fcEpLysoD)*exp(NcEpLyso));
KcEpLyso_int = 0 ;
KcEpLyso_sm = 0;
KcEpLyso_imInt = 0;
KcEpLyso_cEd = 0;
KcEpLyso_cEdMito = 0 ;
KcEpLyso_cEdLyso = 0 ;
KcEpLyso_p = 0;
ScEpLyso = 0;
```

#### % #6: : Interstitium (int)

```
Kint_aEp = 0;
Kint_imEp = 0;
Kint_cEp = -AbEp/Vint*(Pn*(-fcEpN)+Pd*NbEp/(exp(NbEp)-1)*(-fcEpD)*exp(NbEp));
Kint_cEpMito = 0 ;
Kint_cEpLyso = 0 ;
Kint_int = -AbEp/Vint*(Pn*(fintN)+Pd*NbEp/(exp(NbEp)-1)*(fintD))...
    -Asm/Vint*(Pn*fintN+Pd*Nsm/(exp(Nsm)-1)*fintD)...
    -AimInt/Vint*(Pn*fintN+Pd*NimInt/(exp(NimInt)-1)*fintD)...
    +AbEd/Vint*(Pn*(-fintN)+Pd*NbEd/(exp(NbEd)-1)*(-fintD)*exp(NbEd));
Kint_sm = -Asm/Vint*(Pn*(-fsmN)+Pd*Nsm/(exp(Nsm)-1)*(-fsmD)*exp(Nsm));
Kint_imInt = -AimInt/Vint*(Pn*(-fimIntN)+Pd*NimInt/(exp(NimInt)-1)*(-fimIntD)*exp(NimInt));
Kint_cEd = AbEd/Vint*(Pn*(fcEdN)+Pd*NbEd/(exp(NbEd)-1)*(fcEdD));
Kint_cEdMito = 0 ;
Kint_cEdLyso = 0 ;
Kint_p = 0;
Sint = 0;
```

#### % #7: Smooth Muscle (sm)

```
Ksm_aEp = 0;
Ksm_imEp = 0;
Ksm_cEp = 0;
Ksm_cEpMito = 0 ;
Ksm_cEpLyso = 0 ;
Ksm_int = Asm/Vsm*(Pn*fintN+Pd*Nsm/(exp(Nsm)-1)*fintD);
Ksm_sm = Asm/Vsm*(Pn*(-fsmN)+Pd*Nsm/(exp(Nsm)-1)*(-fsmD)*exp(Nsm));
Ksm_imInt = 0;
Ksm_cEd = 0;
Ksm_cEdMito = 0 ;
Ksm_cEdLyso = 0 ;
Ksm_p = 0;
Ssm = 0;
```

#### % #8: Immune Cells (imInt)

```
KimInt_aEp = 0;
KimInt_imEp = 0;
KimInt_cEp = 0;
KimInt_cEpMito = 0;
```

```

KimInt_cEpLyso = 0;
KimInt_int = AimInt/VimInt*(Pn*fintN+Pd*NimInt/(exp(NimInt)-1)*fintD);
KimInt_sm = 0;
KimInt_imInt = AimInt/VimInt*(Pn*(-fimIntN)+Pd*NimInt/(exp(NimInt)-1)*(-fimIntD)*exp(NimInt));
KimInt_cEd = 0;
KimInt_cEdMito = 0;
KimInt_cEdLyso = 0;
KimInt_p = 0;
SimInt = 0;

```

#### % #9: Endothelial celss (cEd)

```

KcEd_aEp = 0;
KcEd_imEp = 0;
KcEd_cEp = 0;
KcEd_cEpMito = 0;
KcEd_cEpLyso = 0;
KcEd_int = -AbEd/VcEd*(Pn*(-fintN)+Pd*NbEd/(exp(NbEd)-1)*(-fintD)*exp(NbEd));
KcEd_sm = 0;
KcEd_imInt = 0;
KcEd_cEd = -AbEd/VcEd*(Pn*(fcEdN)+Pd*NbEd/(exp(NbEd)-1)*(fcEdD))...
    -AcEdMito/VcEd*(Pn*fcEdN+Pd*NcEdMito/(exp(NcEdMito)-1)*fcEdD)...
    -AcEdLyso/VcEd*(Pn*fcEdN+Pd*NcEdLyso/(exp(NcEdLyso)-1)*fcEdD)...
    +AaEd/VcEd*(Pn*(-fcEdN)+Pd*NaEd/(exp(NaEd)-1)*(-fcEdD)*exp(NaEd));
KcEd_cEdMito = -AcEdMito/VcEd*(Pn*(-fcEdMitoN)+Pd*NcEdMito/(exp(NcEdMito)-1)*(-fcEdMitoD)*exp(NcEdMito));
KcEd_cEdLyso = -AcEdLyso/VcEd*(Pn*(-fcEdLysoN)+Pd*NcEdLyso/(exp(NcEdLyso)-1)*(-fcEdLysoD)*exp(NcEdLyso));
KcEd_p = AaEd/VcEd*(Pn*(fpN)+Pd*NaEd/(exp(NaEd)-1)*(fpD));
ScEd = 0;

```

#### % #10: Endothelial celss (cEd) Mito

```

KcEdMito_aEp = 0;
KcEdMito_imEp = 0;
KcEdMito_cEp = 0;
KcEdMito_cEpMito = 0;
KcEdMito_cEpLyso = 0;
KcEdMito_int = 0;
KcEdMito_sm = 0;
KcEdMito_imInt = 0;
KcEdMito_cEd = AcEdMito/VcEdMito*(Pn*(fcEdN)+Pd*NcEdMito/(exp(NcEdMito)-1)*(fcEdD)) ;
KcEdMito_cEdMito = AcEdMito/VcEdMito*(Pn*(-fcEdMitoN)+Pd*NcEdMito/(exp(NcEdMito)-1)*(-fcEdMitoD)*exp(NcEdMito));
KcEdMito_cEdLyso = 0;
KcEdMito_p = 0 ;
ScEdMito = 0;

```

#### % #11: Endothelial celss (cEd) Lyso

```

KcEdLyso_aEp = 0;
KcEdLyso_imEp = 0;
KcEdLyso_cEp = 0;
KcEdLyso_cEpMito = 0;
KcEdLyso_cEpLyso = 0;
KcEdLyso_int = 0 ;
KcEdLyso_sm = 0;
KcEdLyso_imInt = 0;

```

```

KcEdLyso_cEd = AcEdLyso/VcEdLyso*(Pn*(fcEdN)+Pd*NcEdLyso/(exp(NcEdLyso)-1)*(fcEdD)) ;
KcEdLyso_cEdMito = 0;
KcEdLyso_cEdLyso = AcEdLyso/VcEdLyso*(Pn*(-fcEdLysoN)+Pd*NcEdLyso/(exp(NcEdLyso)-1)*(-
fcEdLysoD)*exp(NcEdLyso));
KcEdLyso_p = 0;
ScEdLyso = 0;

% #12: plasma(p)
Kp_aEp = 0;
Kp_imEp = 0;
Kp_cEp = 0;
Kp_cEpMito = 0;
Kp_cEpLyso = 0;
Kp_int = 0;
Kp_sm = 0;
Kp_imInt = 0;
Kp_cEd = -AaEd/Vp*(Pn*(-fcEdN)+Pd*NaEd/(exp(NaEd)-1)*(-fcEdD)*exp(NaEd));
Kp_cEdMito = 0;
Kp_cEdLyso = 0;
Kp_p = -AaEd/Vp*(Pn*(fpN)+Pd*NaEd/(exp(NaEd)-1)*(fpD));
Sp = 0;

M =
[KaEp_aEp,KaEp_imEp,KaEp_cEp,KaEp_cEpMito,KaEp_cEpLyso,KaEp_int,KaEp_sm,KaEp_imInt,KaEp_cEd,K
aEp_cEdMito,KaEp_cEdLyso,KaEp_p;...

KimEp_aEp,KimEp_imEp,KimEp_cEp,KimEp_cEpMito,KimEp_cEpLyso,KimEp_int,KimEp_sm,KimEp_imInt,K
imEp_cEd,KimEp_cEdMito,KimEp_cEdLyso,KimEp_p;...

KcEp_aEp,KcEp_imEp,KcEp_cEp,KcEp_cEpMito,KcEp_cEpLyso,KcEp_int,KcEp_sm,KcEp_imInt,KcEp_cEd,Kc
Ep_cEdMito,KcEp_cEdLyso,KcEp_p;...

KcEpMito_aEp,KcEpMito_imEp,KcEpMito_cEp,KcEpMito_cEpMito,KcEpMito_cEpLyso,KcEpMito_int,KcEpMi
to_sm,KcEpMito_imInt,KcEpMito_cEd,KcEpMito_cEdMito,KcEpMito_cEdLyso,KcEpMito_p;...

KcEpLyso_aEp,KcEpLyso_imEp,KcEpLyso_cEp,KcEpLyso_cEpMito,KcEpLyso_cEpLyso,KcEpLyso_int,KcEpL
yso_sm,KcEpLyso_imInt,KcEpLyso_cEd,KcEpLyso_cEdMito,KcEpLyso_cEdLyso,KcEpLyso_p;...

Kint_aEp,Kint_imEp,Kint_cEp,Kint_cEpMito,Kint_cEpLyso,Kint_int,Kint_sm,Kint_imInt,Kint_cEd,Kint_cEdMit
o,Kint_cEdLyso,Kint_p;...

Ksm_aEp,Ksm_imEp,Ksm_cEp,Ksm_cEpMito,Ksm_cEpLyso,Ksm_int,Ksm_sm,Ksm_imInt,Ksm_cEd,Ksm_cEd
Mito,Ksm_cEdLyso,Ksm_p;...

KimInt_aEp,KimInt_imEp,KimInt_cEp,KimInt_cEpMito,KimInt_cEpLyso,KimInt_int,KimInt_sm,KimInt_imInt,K
imInt_cEd,KimInt_cEdMito,KimInt_cEdLyso,KimInt_p;...

KcEd_aEp,KcEd_imEp,KcEd_cEp,KcEd_cEpMito,KcEd_cEpLyso,KcEd_int,KcEd_sm,KcEd_imInt,KcEd_cEd,Kc
Ed_cEdMito,KcEd_cEdLyso,KcEd_p;...

KcEdMito_aEp,KcEdMito_imEp,KcEdMito_cEp,KcEdMito_cEpMito,KcEdMito_cEpLyso,KcEdMito_int,KcEdMi
to_sm,KcEdMito_imInt,KcEdMito_cEd,KcEdMito_cEdMito,KcEdMito_cEdLyso,KcEdMito_p;...

```

KcEdLyso\_aEp,KcEdLyso\_imEp,KcEdLyso\_cEp,KcEdLyso\_cEpMito,KcEdLyso\_cEpLyso,KcEdLyso\_int,KcEdLyso\_sm,KcEdLyso\_imInt,KcEdLyso\_cEd,KcEdLyso\_cEdMito,KcEdLyso\_cEdLyso,KcEdLyso\_p;...

Kp\_aEp,Kp\_imEp,Kp\_cEp,Kp\_cEpMito,Kp\_cEpLyso,Kp\_int,Kp\_sm,Kp\_imInt,Kp\_cEd,Kp\_cEdMito,Kp\_cEdLyso,Kp\_p];

G = [SaEp,SimEp,ScEp,ScEpMito,ScEpLyso,Sint,Ssm,SimInt,ScEd,ScEdMito,ScEdLyso,Sp]';

```

% By J YU @ 5/5/2010
% This is the generic PBPK model of rat
% The blood con is fixed, so systemic PK is a constant in this model
#####

% Virtual Lung (with Mito and Lyso in cEp and cEd) - PBPK
% Six big compartment model: arterial blood, lung, venous blood, liver, brain, and rest

function [dConc] = Local_lung_PBPK(t,Conc,pKa,logPN,fup,B2P)
%%call lung model
[LungM, LungG, M_v, Vp] = Lung_AL(pKa,logPN); % get the coefficients for the Alveolar Region
[LungM_Airways, LungG_Airways, M_v_Airways, Vp_Airways] = Lung_AW(pKa,logPN); % get the coefficients
for the airways

% Body weight (kg)
BW = 0.25 ;
V_VEN = 0.0544*BW*1000 ;
% From PATRICK POULIN, FRANK-PETER. THEILPrediction of Pharmacokinetics prior to In Vivo Studies.
% II. Generic Physiologically Based Pharmacokinetic Models of Drug Disposition
% Blood flow rate (mL/min)
Q_tot = 0.235*BW^0.75*1000 ; % Total cardiac output = 0.235 * body weight (kg)^0.75 (L/min)
Q_LUN = Q_tot ;
Q_BRA = 0.02*Q_tot ;
Q_LIV = 0.175*Q_tot ;
Q_Airways = 0.01*Q_tot;
Q_RES = Q_tot - Q_BRA - Q_LIV - Q_Airways;

% Volume of each organ (mL)= fraction of total body volume (L/kg)*BW*1000
V_ART = 0.0272*BW*1000 ;
V_LUN = trace(M_v)*10^6 ;
V_LUNp = Vp*10^(6) ; % plasma volume in the lung,
V_LUNb = 519*10^(-3)*V_LUN ; % total blood volume in the lung = 519uL/g
V_LUN_Airways = trace(M_v_Airways)*10^6 ;
V_LUNp_Airways = Vp_Airways*10^(6) ;
V_LUNb_Airways = 519*10^(-3)*V_LUN_Airways ;
V_VEN = 0.0544*BW*1000 ;
V_BRA = 0.0057*BW*1000 ;
V_LIV = 0.0366*BW*1000 ;
V_RES = BW*1000 - V_ART - V_LUN - V_LUNp - V_LUNb - V_LUN_Airways - V_LUNp_Airways -
V_LUNb_Airways - V_VEN - V_BRA - V_LIV ;

% Tissue : Blood partition coefficient = K(Tissue:Plasma)/B2P
% Kp: tissue:blood partition coefficients, calculated from above
% experimental data (AUC 0-inf ratio of tissue : blood)
Kp_BRA = 0.11 ; % from exp.
Kp_LIV = 3.21 ; % from exp.
Kp_LUN = 2.55 ; % from exp.
Kp_RES = 1.2 ; % arbitrary
Kiv = 0 ;

% Mass balance
% 1 - Arterial, ART
% 2 - Lung plasma free concentration, LUN,
% Cellular compartments of the lung:
% 7 - Surface lining liquid (aEp)
% 8 - Macrophage (imEp)

```

% 9 - Epithelial cells (cEp)  
 % 10 - cEp-mito  
 % 11 - cEp-lyso  
 % 12 - Interstitium (int)  
 % 13 - Smooth muscle (sm)  
 % 14 - Immune cells (imInt)  
 % 15 - Endothelial cells (cEd)  
 % 16 - cEd - mito  
 % 17 - cEd -lyso  
 % 3 - Venous, VEN  
 % 4 - Brain, BRA  
 % 5 - Liver, atenolol is mainly cleared by kidney  
 % 6 - Rest of the body, RES

dConc(1) = 0; % ART, arterial blood  
 dConc(2) = 0 ; % 2 -Lung total blood concentration was fixed at 1

$$\begin{aligned} \text{dConc}(7) = & \text{LungM}(1,1)*\text{Conc}(7) + \text{LungM}(1,2)*\text{Conc}(8) + \text{LungM}(1,3)*\text{Conc}(9) + \text{LungM}(1,4)*\text{Conc}(10) + \\ & \text{LungM}(1,5)*\text{Conc}(11)... \\ & + \text{LungM}(1,6)*\text{Conc}(12) + \text{LungM}(1,7)*\text{Conc}(13) + \text{LungM}(1,8)*\text{Conc}(14) + \text{LungM}(1,9)*\text{Conc}(15) + \\ & \text{LungM}(1,10)*\text{Conc}(16)... \\ & + \text{LungM}(1,11)*\text{Conc}(17) + \text{LungM}(1,12)*\text{Conc}(2)*\text{fup}/\text{B2P} + \text{LungG}(1); \end{aligned}$$
 % 7 -  
 SurfaConce lining liquid (aEp)

$$\begin{aligned} \text{dConc}(8) = & \text{LungM}(2,1)*\text{Conc}(7) + \text{LungM}(2,2)*\text{Conc}(8) + \text{LungM}(2,3)*\text{Conc}(9) + \text{LungM}(2,4)*\text{Conc}(10) + \\ & \text{LungM}(2,5)*\text{Conc}(11)... \\ & + \text{LungM}(2,6)*\text{Conc}(12) + \text{LungM}(2,7)*\text{Conc}(13) + \text{LungM}(2,8)*\text{Conc}(14) + \text{LungM}(2,9)*\text{Conc}(15) + \\ & \text{LungM}(2,10)*\text{Conc}(16)... \\ & + \text{LungM}(2,11)*\text{Conc}(17) + \text{LungM}(2,12)*\text{Conc}(2)*\text{fup}/\text{B2P} + \text{LungG}(2); \end{aligned}$$
 % 8 -  
 Macrophage (imEp)

$$\begin{aligned} \text{dConc}(9) = & \text{LungM}(3,1)*\text{Conc}(7) + \text{LungM}(3,2)*\text{Conc}(8) + \text{LungM}(3,3)*\text{Conc}(9) + \text{LungM}(3,4)*\text{Conc}(10) + \\ & \text{LungM}(3,5)*\text{Conc}(11)... \\ & + \text{LungM}(3,6)*\text{Conc}(12) + \text{LungM}(3,7)*\text{Conc}(13) + \text{LungM}(3,8)*\text{Conc}(14) + \text{LungM}(3,9)*\text{Conc}(15) + \\ & \text{LungM}(3,10)*\text{Conc}(16)... \\ & + \text{LungM}(3,11)*\text{Conc}(17) + \text{LungM}(3,12)*\text{Conc}(2)*\text{fup}/\text{B2P} + \text{LungG}(3); \end{aligned}$$
 % 9 -  
 Epithelial cells (cEp)

$$\begin{aligned} \text{dConc}(10) = & \text{LungM}(4,1)*\text{Conc}(7) + \text{LungM}(4,2)*\text{Conc}(8) + \text{LungM}(4,3)*\text{Conc}(9) + \text{LungM}(4,4)*\text{Conc}(10) + \\ & \text{LungM}(4,5)*\text{Conc}(11)... \\ & + \text{LungM}(4,6)*\text{Conc}(12) + \text{LungM}(4,7)*\text{Conc}(13) + \text{LungM}(4,8)*\text{Conc}(14) + \text{LungM}(4,9)*\text{Conc}(15) + \\ & \text{LungM}(4,10)*\text{Conc}(16)... \\ & + \text{LungM}(4,11)*\text{Conc}(17) + \text{LungM}(4,12)*\text{Conc}(2)*\text{fup}/\text{B2P} + \text{LungG}(4); \end{aligned}$$
 % 10 -  
 Epithelial cells (cEpMito)

$$\begin{aligned} \text{dConc}(11) = & \text{LungM}(5,1)*\text{Conc}(7) + \text{LungM}(5,2)*\text{Conc}(8) + \text{LungM}(5,3)*\text{Conc}(9) + \text{LungM}(5,4)*\text{Conc}(10) + \\ & \text{LungM}(5,5)*\text{Conc}(11)... \\ & + \text{LungM}(5,6)*\text{Conc}(12) + \text{LungM}(5,7)*\text{Conc}(13) + \text{LungM}(5,8)*\text{Conc}(14) + \text{LungM}(5,9)*\text{Conc}(15) + \\ & \text{LungM}(5,10)*\text{Conc}(16)... \\ & + \text{LungM}(5,11)*\text{Conc}(17) + \text{LungM}(5,12)*\text{Conc}(2)*\text{fup}/\text{B2P} + \text{LungG}(5); \end{aligned}$$
 % 11 -  
 Epithelial cells (cEpLyso)

$$\text{dConc}(12) = \text{LungM}(6,1)*\text{Conc}(7) + \text{LungM}(6,2)*\text{Conc}(8) + \text{LungM}(6,3)*\text{Conc}(9) + \text{LungM}(6,4)*\text{Conc}(10) + \text{LungM}(6,5)*\text{Conc}(11)...$$

+ LungM(6,6)\*Conc(12) + LungM(6,7)\*Conc(13) + LungM(6,8)\*Conc(14) + LungM(6,9)\*Conc(15) + LungM(6,10)\*Conc(16)...

+ LungM(6,11)\*Conc(17) + LungM(6,12)\*Conc(2)\*fup/B2P + LungG(6); % 12 -

Interstitialium (int)

dConc(13) = LungM(7,1)\*Conc(7) + LungM(7,2)\*Conc(8) + LungM(7,3)\*Conc(9) + LungM(7,4)\*Conc(10) + LungM(7,5)\*Conc(11)...

+ LungM(7,6)\*Conc(12) + LungM(7,7)\*Conc(13) + LungM(7,8)\*Conc(14) + LungM(7,9)\*Conc(15) + LungM(7,10)\*Conc(16)...

+ LungM(7,11)\*Conc(17) + LungM(7,12)\*Conc(2)\*fup/B2P + LungG(7); % 13-

Smooth muscle (sm)

dConc(14) = LungM(8,1)\*Conc(7) + LungM(8,2)\*Conc(8) + LungM(8,3)\*Conc(9) + LungM(8,4)\*Conc(10) + LungM(8,5)\*Conc(11)...

+ LungM(8,6)\*Conc(12) + LungM(8,7)\*Conc(13) + LungM(8,8)\*Conc(14) + LungM(8,9)\*Conc(15) + LungM(8,10)\*Conc(16)...

+ LungM(8,11)\*Conc(17) + LungM(8,12)\*Conc(2)\*fup/B2P + LungG(8); % 14 -

Immune cells (imInt)

dConc(15) = LungM(9,1)\*Conc(7) + LungM(9,2)\*Conc(8) + LungM(9,3)\*Conc(9) + LungM(9,4)\*Conc(10) + LungM(9,5)\*Conc(11)...

+ LungM(9,6)\*Conc(12) + LungM(9,7)\*Conc(13) + LungM(9,8)\*Conc(14) + LungM(9,9)\*Conc(15) + LungM(9,10)\*Conc(16)...

+ LungM(9,11)\*Conc(17) + LungM(9,12)\*Conc(2)\*fup/B2P + LungG(9); % 15 -

Endothelial cells (cEd)

dConc(16) = LungM(10,1)\*Conc(7) + LungM(10,2)\*Conc(8) + LungM(10,3)\*Conc(9) + LungM(10,4)\*Conc(10) + LungM(10,5)\*Conc(11)...

+ LungM(10,6)\*Conc(12) + LungM(10,7)\*Conc(13) + LungM(10,8)\*Conc(14) + LungM(10,9)\*Conc(15) + LungM(10,10)\*Conc(16)...

+ LungM(10,11)\*Conc(17) + LungM(10,12)\*Conc(2)\*fup/B2P + LungG(10); % 16-

Endothelial cells (cEdMito)

dConc(17) = LungM(11,1)\*Conc(7) + LungM(11,2)\*Conc(8) + LungM(11,3)\*Conc(9) + LungM(11,4)\*Conc(10) + LungM(11,5)\*Conc(11)...

+ LungM(11,6)\*Conc(12) + LungM(11,7)\*Conc(13) + LungM(11,8)\*Conc(14) + LungM(11,9)\*Conc(15) + LungM(11,10)\*Conc(16)...

+ LungM(11,11)\*Conc(17) + LungM(11,12)\*Conc(2)\*fup/B2P + LungG(11); % 17 -

Endothelial cells (cEdLyso)

CL = 0 ; % systemic CL was fixed at 0, blood concentration was fixed at initial value given

dConc(3) = 0; % Venous blood

dConc(4) = 0; % Brain

dConc(5) = 0; % Liver

dConc(6) = 0; % others

dConc(18) = 0 ; % 18 -Lung airways blood concentration was fixed at 1

dConc(19) = LungM\_Airways(1,1)\*Conc(19) + LungM\_Airways(1,2)\*Conc(20) + LungM\_Airways(1,3)\*Conc(21) + LungM\_Airways(1,4)\*Conc(22) + LungM\_Airways(1,5)\*Conc(23)...

+ LungM\_Airways(1,6)\*Conc(24) + LungM\_Airways(1,7)\*Conc(25) + LungM\_Airways(1,8)\*Conc(26) + LungM\_Airways(1,9)\*Conc(27) + LungM\_Airways(1,10)\*Conc(28)...

+ LungM\_Airways(1,11)\*Conc(29)+ LungM\_Airways(1,12)\*Conc(30)+  
LungM\_Airways(1,13)\*Conc(31) ...  
+ LungM\_Airways(1,14)\*Conc(18)\*fup/B2P + LungG\_Airways(1); % 19 -  
SurfaConce lining liquid (aEp)

dConc(20) = LungM\_Airways(2,1)\*Conc(19) + LungM\_Airways(2,2)\*Conc(20) +  
LungM\_Airways(2,3)\*Conc(21) + LungM\_Airways(2,4)\*Conc(22) + LungM\_Airways(2,5)\*Conc(23)...  
+ LungM\_Airways(2,6)\*Conc(24) + LungM\_Airways(2,7)\*Conc(25) + LungM\_Airways(2,8)\*Conc(26) +  
LungM\_Airways(2,9)\*Conc(27) + LungM\_Airways(2,10)\*Conc(28)...  
+ LungM\_Airways(2,11)\*Conc(29)+ LungM\_Airways(2,12)\*Conc(30)+  
LungM\_Airways(2,13)\*Conc(31) ...  
+ LungM\_Airways(2,14)\*Conc(18)\*fup/B2P + LungG\_Airways(2); % 20 -  
Macrophage (imEp)

dConc(21) = LungM\_Airways(3,1)\*Conc(19) + LungM\_Airways(3,2)\*Conc(20) +  
LungM\_Airways(3,3)\*Conc(21) + LungM\_Airways(3,4)\*Conc(22) + LungM\_Airways(3,5)\*Conc(23)...  
+ LungM\_Airways(3,6)\*Conc(24) + LungM\_Airways(3,7)\*Conc(25) + LungM\_Airways(3,8)\*Conc(26) +  
LungM\_Airways(3,9)\*Conc(27) + LungM\_Airways(3,10)\*Conc(28)...  
+ LungM\_Airways(3,11)\*Conc(29)+ LungM\_Airways(3,12)\*Conc(30)+  
LungM\_Airways(3,13)\*Conc(31) ...  
+LungM\_Airways(3,14)\*Conc(18)\*fup/B2P + LungG\_Airways(3); % 21 - Epithelial  
cells (cEp)

dConc(22) = LungM\_Airways(4,1)\*Conc(19) + LungM\_Airways(4,2)\*Conc(20) +  
LungM\_Airways(4,3)\*Conc(21) + LungM\_Airways(4,4)\*Conc(22) + LungM\_Airways(4,5)\*Conc(23)...  
+ LungM\_Airways(4,6)\*Conc(24) + LungM\_Airways(4,7)\*Conc(25) + LungM\_Airways(4,8)\*Conc(26) +  
LungM\_Airways(4,9)\*Conc(27) + LungM\_Airways(4,10)\*Conc(28)...  
+ LungM\_Airways(4,11)\*Conc(29)+ LungM\_Airways(4,12)\*Conc(30)+  
LungM\_Airways(4,13)\*Conc(31) ...  
+ LungM\_Airways(4,14)\*Conc(18)\*fup/B2P + LungG\_Airways(4); % 22 - Epithelial  
cells (cEpMito)

dConc(23) = LungM\_Airways(5,1)\*Conc(19) + LungM\_Airways(5,2)\*Conc(20) +  
LungM\_Airways(5,3)\*Conc(21) + LungM\_Airways(5,4)\*Conc(22) + LungM\_Airways(5,5)\*Conc(23)...  
+ LungM\_Airways(5,6)\*Conc(24) + LungM\_Airways(5,7)\*Conc(25) + LungM\_Airways(5,8)\*Conc(26) +  
LungM\_Airways(5,9)\*Conc(27) + LungM\_Airways(5,10)\*Conc(28)...  
+ LungM\_Airways(5,11)\*Conc(29)+ LungM\_Airways(5,12)\*Conc(30)+  
LungM\_Airways(5,13)\*Conc(31) ...  
+ LungM\_Airways(5,14)\*Conc(18)\*fup/B2P + LungG\_Airways(5); % 23 - Epithelial  
cells (cEpLyso)

dConc(24) = LungM\_Airways(6,1)\*Conc(19) + LungM\_Airways(6,2)\*Conc(20) +  
LungM\_Airways(6,3)\*Conc(21) + LungM\_Airways(6,4)\*Conc(22) + LungM\_Airways(6,5)\*Conc(23)...  
+ LungM\_Airways(6,6)\*Conc(24) + LungM\_Airways(6,7)\*Conc(25) + LungM\_Airways(6,8)\*Conc(26) +  
LungM\_Airways(6,9)\*Conc(27) + LungM\_Airways(6,10)\*Conc(28)...  
+ LungM\_Airways(6,11)\*Conc(29)+ LungM\_Airways(6,12)\*Conc(30)+  
LungM\_Airways(6,13)\*Conc(31) ...  
+ LungM\_Airways(6,14)\*Conc(18)\*fup/B2P + LungG\_Airways(6); % 24 -  
Interstitial (int)

dConc(25) = LungM\_Airways(7,1)\*Conc(19) + LungM\_Airways(7,2)\*Conc(20) +  
LungM\_Airways(7,3)\*Conc(21) + LungM\_Airways(7,4)\*Conc(22) + LungM\_Airways(7,5)\*Conc(23)...  
+ LungM\_Airways(7,6)\*Conc(24) + LungM\_Airways(7,7)\*Conc(25) + LungM\_Airways(7,8)\*Conc(26) +  
LungM\_Airways(7,9)\*Conc(27) + LungM\_Airways(7,10)\*Conc(28)...  
+ LungM\_Airways(7,14)\*Conc(29)+ LungM\_Airways(7,12)\*Conc(30)+  
LungM\_Airways(7,13)\*Conc(31) ...

+ LungM\_Airways(7,12)\*Conc(18)\*fup/B2P + LungG\_Airways(7); % 25 - Smooth  
muscle (sm)

dConc(26) = LungM\_Airways(8,1)\*Conc(19) + LungM\_Airways(8,2)\*Conc(20) +  
LungM\_Airways(8,3)\*Conc(21) + LungM\_Airways(8,4)\*Conc(22) + LungM\_Airways(8,5)\*Conc(23)...  
+ LungM\_Airways(8,6)\*Conc(24) + LungM\_Airways(8,7)\*Conc(25) + LungM\_Airways(8,8)\*Conc(26) +  
LungM\_Airways(8,9)\*Conc(27) + LungM\_Airways(8,10)\*Conc(28)...  
+ LungM\_Airways(8,11)\*Conc(29) + LungM\_Airways(8,12)\*Conc(30)+  
LungM\_Airways(8,13)\*Conc(31) ...  
+ LungM\_Airways(8,14)\*Conc(18)\*fup/B2P + LungG\_Airways(8); % 26 - Smooth  
muscle (smMito)

dConc(27) = LungM\_Airways(9,1)\*Conc(19) + LungM\_Airways(9,2)\*Conc(20) +  
LungM\_Airways(9,3)\*Conc(21) + LungM\_Airways(9,4)\*Conc(22) + LungM\_Airways(9,5)\*Conc(23)...  
+ LungM\_Airways(9,6)\*Conc(24) + LungM\_Airways(9,7)\*Conc(25) + LungM\_Airways(9,8)\*Conc(26) +  
LungM\_Airways(9,9)\*Conc(27) + LungM\_Airways(9,10)\*Conc(28)...  
+ LungM\_Airways(9,11)\*Conc(29) + LungM\_Airways(9,12)\*Conc(30)+  
LungM\_Airways(9,13)\*Conc(31) ...  
+ LungM\_Airways(9,14)\*Conc(18)\*fup/B2P + LungG\_Airways(9); % 27 - Smooth  
muscle (smLyso)

dConc(28) = LungM\_Airways(10,1)\*Conc(19) + LungM\_Airways(10,2)\*Conc(20) +  
LungM\_Airways(10,3)\*Conc(21) + LungM\_Airways(10,4)\*Conc(22) + LungM\_Airways(10,5)\*Conc(23)...  
+ LungM\_Airways(10,6)\*Conc(24) + LungM\_Airways(10,7)\*Conc(25) +  
LungM\_Airways(10,8)\*Conc(26) + LungM\_Airways(10,9)\*Conc(27) + LungM\_Airways(10,10)\*Conc(28)...  
+ LungM\_Airways(10,11)\*Conc(29) + LungM\_Airways(10,12)\*Conc(30)+  
LungM\_Airways(10,13)\*Conc(31) ...  
+ LungM\_Airways(10,14)\*Conc(18)\*fup/B2P + LungG\_Airways(10); % 28 - Immune  
cells (imInt)

dConc(29) = LungM\_Airways(11,1)\*Conc(19) + LungM\_Airways(11,2)\*Conc(20) +  
LungM\_Airways(11,3)\*Conc(21) + LungM\_Airways(11,4)\*Conc(22) + LungM\_Airways(11,5)\*Conc(23)...  
+ LungM\_Airways(11,6)\*Conc(24) + LungM\_Airways(11,7)\*Conc(25) +  
LungM\_Airways(11,8)\*Conc(26) + LungM\_Airways(11,9)\*Conc(27) + LungM\_Airways(11,10)\*Conc(28)...  
+ LungM\_Airways(11,11)\*Conc(29) + LungM\_Airways(11,12)\*Conc(30)+  
LungM\_Airways(11,13)\*Conc(31) ...  
+ LungM\_Airways(11,14)\*Conc(18)\*fup/B2P + LungG\_Airways(11); % 29 -  
Endothelial cells

dConc(30) = LungM\_Airways(12,1)\*Conc(19) + LungM\_Airways(12,2)\*Conc(20) +  
LungM\_Airways(12,3)\*Conc(21) + LungM\_Airways(12,4)\*Conc(22) + LungM\_Airways(12,5)\*Conc(23)...  
+ LungM\_Airways(12,6)\*Conc(24) + LungM\_Airways(12,7)\*Conc(25) +  
LungM\_Airways(12,8)\*Conc(26) + LungM\_Airways(12,9)\*Conc(27) + LungM\_Airways(12,10)\*Conc(28)...  
+ LungM\_Airways(12,11)\*Conc(29) + LungM\_Airways(12,12)\*Conc(30)+  
LungM\_Airways(12,13)\*Conc(31) ...  
+ LungM\_Airways(12,14)\*Conc(18)\*fup/B2P + LungG\_Airways(12); % 28 -  
Endothelial cells (cEdMito)

dConc(31) = LungM\_Airways(13,1)\*Conc(19) + LungM\_Airways(13,2)\*Conc(20) +  
LungM\_Airways(13,3)\*Conc(21) + LungM\_Airways(13,4)\*Conc(22) + LungM\_Airways(13,5)\*Conc(23)...  
+ LungM\_Airways(13,6)\*Conc(24) + LungM\_Airways(13,7)\*Conc(25) +  
LungM\_Airways(13,8)\*Conc(26) + LungM\_Airways(13,9)\*Conc(27) + LungM\_Airways(13,10)\*Conc(28)...  
+ LungM\_Airways(13,11)\*Conc(29) + LungM\_Airways(13,12)\*Conc(30)+  
LungM\_Airways(13,13)\*Conc(31) ...

```

+ LungM_Airways(13,14)*Conc(18)*fup/B2P + LungG_Airways(13);
Endothelial cells (cEdLyso) % 29 -

```

```

Vtot = diag([V_ART V_LUNb V_VEN V_BRA V_LIV V_RES diag(M_v)*10^6 V_LUNb_Airways
diag(M_v_Airways)*10^6]) ;

```

```

dConc = [dConc(1), dConc(2), dConc(3), dConc(4), dConc(5), dConc(6), dConc(7), dConc(8), dConc(9),
dConc(10),...
dConc(11), dConc(12), dConc(13), dConc(14), dConc(15), dConc(16), dConc(17),...
dConc(18), dConc(19), dConc(20), dConc(21), dConc(22), dConc(23), dConc(24),...
dConc(25), dConc(26), dConc(27), dConc(28), dConc(29), dConc(30), dConc(31)]' ;

```

```

%%%%%%%%%%%%%%%%%%%%%%%%%%%%%%%%%%%%%%%%%%%%%%%%%%%%%%%%%%%%%%%%%%%%%%%%
%%%%%%%%%%%%%%%%%%%%%%%%%%%%%%%%%%%%%%%%%%%%%%%%%%%%%%%%%%%%%%%%%%%%%%%%
%%%%%%%%%%%%%%%%%%%%%%%%%%%%%%%%%%%%%%%%%%%%%%%%%%%%%%%%%%%%%%%%%%%%%%%%

```

```

%      IV simulation

```

```

%%%%%%%%%%%%%%%%%%%%%%%%%%%%%%%%%%%%%%%%%%%%%%%%%%%%%%%%%%%%%%%%%%%%%%%%
%%%%%%%%%%%%%%%%%%%%%%%%%%%%%%%%%%%%%%%%%%%%%%%%%%%%%%%%%%%%%%%%%%%%%%%%
%%%%%%%%%%%%%%%%%%%%%%%%%%%%%%%%%%%%%%%%%%%%%%%%%%%%%%%%%%%%%%%%%%%%%%%%

```

```

function [Kpu,Kpu_al,Kpu_aw,M_lung,M_al,M_aw,Mass_t_al,Mass_t_aw,Mass_t_lung,Mass_s_al,Mass_s_aw] =
Local_lung_Kpu_fun(pKa,logPN,fup,B2P)

```

```

tic ;

```

```

BW = 0.25;

```

```

%call functions for airways and alveoli dynamics parameter

```

```

[M, G, M_v, Vp] = Lung_AL(pKa,logPN);%alveolar region

```

```

[M_Airways, G_Airways, M_v_Airways, Vp_Airways] = Lung_AW(pKa,logPN);%airway

```

```

BW = 0.25 ; %kg from experiment

```

```

V_VEN = 0.0544*BW*1000 ;

```

```

Y0 = zeros(31,1) ;

```

```

dose = 1*BW ; %mg inhalation

```

```

Y0(2) = 1 ; %mg/ml fixed blood

```

```

Y0(18) = 1 ; %mg/ml, fixed blood

```

```

Yopt = 1e-13 * ones(1,31) ;

```

```

options = odeset('RelTol',1e-13,'AbsTol',Yopt);

```

```

[T,Y] = ode15s(@Local_lung_PBPk,[0 100*60],Y0,options,pKa,logPN,fup,B2P);

```

```

% lumped volume of total lung, airways and alveoli

```

```

V_lung_total = (trace(M_v) + trace(M_v_Airways))*10^6;

```

```

V_al = trace(M_v)*10^6;

```

```

V_aw = trace(M_v_Airways)*10^6;

```

```

Mass_al = sum(Y(:,7:17)*M_v*10^6,2);%mg

```

```

Mass_aw = sum(Y(:,19:31)*M_v_Airways*10^6,2);%mg

```

```

Mass_lung = Mass_al + Mass_aw;%mg

```

```

index = sum(Mass_lung>dose/2);

```

```

%t_half = T(index)

```

```

Mass_surf_al = Y(:,7)*M_v(1,1)*10^6;%mg

```

```

Mass_surf_aw = Y(:,19)*M_v_Airways(1,1)*10^6;%mg

```

```

Mass_tissue_al = Mass_al - Mass_surf_al;%mg

```

```

Mass_tissue_aw = Mass_aw - Mass_surf_aw;%mg

```

```

Mass_tissue_lung = Mass_tissue_al + Mass_tissue_aw;%mg

```

```

% compute the mito mass/concentration

```

```

M_al = Y(:,7:17)*M_v*10^6;%mg

```

```

M_aw = Y(:,19:31)*M_v_Airways*10^6;%mg

```

```

M_mito_al = M_al(:,4)+M_al(:,10);

```

```

M_mito_aw = M_aw(:,4)+M_aw(:,8)+M_aw(:,12);

```

```

C_mito_al = M_mito_al(end)/((M_v(4,4)+M_v(10,10))*10^6);

```

```

C_mito_aw = M_mito_aw(end)/((M_v_Airways(4,4)+M_v_Airways(8,8)+M_v_Airways(12,12))*10^6);

```

```

C_mito_all =

```

```

(M_mito_al(end)+M_mito_aw(end))/((M_v(4,4)+M_v(10,10)+M_v_Airways(4,4)+M_v_Airways(8,8)+M_v_Airways(12,12))*10^6);

```

```

% total lung, airways, and alveoli concentration

```

```

C_lung = Mass_lung/(V_lung_total);%mg/ml

```

```

Kpu = C_lung(end)/(1*fup/B2P);

```

```
Kpu_al = (Mass_al(end)/V_al)/(1*fup/B2P);  
Kpu_aw = (Mass_aw(end)/V_aw)/(1*fup/B2P);  
K_mass_al_aw = Mass_al(end)/Mass_aw(end);
```

```
%mass in tissue,cellular tissue  
M_lung = Mass_lung(end);  
M_al = Mass_al(end);  
M_aw = Mass_aw(end);  
Mass_t_al=Mass_tissue_al(end);  
Mass_t_aw=Mass_tissue_aw(end);  
Mass_t_lung=Mass_tissue_lung(end);  
Mass_s_al = Mass_surf_al(end);  
Mass_s_aw = Mass_surf_aw(end);
```

```
toc ;
```

```

% Main function: Calculate mass in airways and alveoli, and ratio
%%%%%%%%%%%%%%%%%%%%%%%%%%%%%%%%%%%%%%%%%%%%%%%%%%%%%%%%%%%%%%%%%%%%%%%%%IV injection steady
%%%%%%%%%%%%%%%%%%%%%%%%%%%%%%%%%%%%%%%%%%%%%%%%%%%%%%%%%%%%%%%%%%%%%%%%%

clear
clc
close all;
i = 1;
for logP = [-2:0.4:4]
    j = 1;
    for pKa = [5:0.4:14,14]
        [Kpu_pred_all(i,j),Kpu_al(i,j),Kpu_aw(i,j),M_lung(i,j),M_al(i,j),M_aw(i,j),...
            Mass_t_al(i,j),Mass_t_aw(i,j),Mass_t_lung(i,j),Mass_s_al(i,j),Mass_s_aw(i,j)] ...
            = Local_lung_Kpu_fun(pKa,logP,1,1);
        Mat_logP(i,j) = logP;
        Mat_pKa(i,j) = pKa;
        j = j + 1;
    end
    i = i + 1;
end
save('logP_pKa_Mass_al_aw');

K = M_al./M_aw;
P_al = M_al./M_lung*100;
P_aw = M_aw./M_lung*100;

subplot(1,3,1);
%v=[2:5:20,50:50:100,500,1000:1000:6000];
v1=[0:5:100];
[C1,H1]=contour(Mat_logP,Mat_pKa,P_al,v1,'LineWidth',3,...
    'LineColor',[0 0 0]);
%clabel(C,H,'manual');
clabel(C1,H1,'manual','FontSize',22);

subplot(1,3,2);
v2=[0:5:100];
[C2,H2]=contour(Mat_logP,Mat_pKa,P_aw,v2,'LineWidth',3,...
    'LineColor',[0 0 0]);
%clabel(C,H,'manual');
clabel(C2,H2,'manual','FontSize',22);

subplot(1,3,3);
v3=[1,3,5,10,20:10:50];
[C3,H3]=contour(Mat_logP,Mat_pKa,K,v3,'LineWidth',3,...
    'LineColor',[0 0 0]);
%clabel(C,H,'manual');
clabel(C3,H3,'manual','FontSize',22);

```
